# Supplementary material for: The gas-phase ozonolysis of β-caryophyllene (C15H24). Part II: A theoretical study
Source: Royal Society of Chemistry journal article supplement (doi:10.1039/b817913a), 2009-01-01
Supplement: b817913a.pdf [file b817913a.pdf]

# The Gas-Phase Ozonolysis of $\beta$ -Caryophyllene ( $C_{15}H_{24}$ ): A Theoretical Study

## \*\*\* Supporting Information \*\*\*

T. L. Nguyen,<sup>a</sup> R. Winterhalter,<sup>b</sup> G. Moortgat,<sup>b</sup> B. Kanawati,<sup>b</sup> J. Peeters,<sup>a</sup> and L. Vereecken<sup>a,\*</sup>

*a) Department of Chemistry, University of Leuven, Celestijnenlaan 200F, B-3001 Leuven, Belgium.*

*b) Max-Planck Institute, Atmospheric Chemistry Division, P.O. Box 3060, D-55020 Mainz, Germany*

*\* Email: Luc.Vereecken@chem.kuleuven.be, Fax: +32-16-327992*

### Table of contents:

|               |                                                                                               |
|---------------|-----------------------------------------------------------------------------------------------|
| Page 2        | : Tables S1-S2: Energetics of ozone addition onto $\alpha$ - and $\beta$ -pinene              |
| Page 3        | : Tables S3-S5: Simplified analogues of $\beta$ -caryophyllene + O <sub>3</sub> intermediates |
| Page 4        | : Table S6: Computed thermal unimolecular reaction rates of CIs                               |
| Page 5        | : Table S7: Computed relative energies for TS and intermediates                               |
| Page 6 - 7    | : Figures S1-S2: Triplet bis(oxy) biradical decomposition                                     |
| Page 8 - 10   | : PES and product distribution of the O <sub>3</sub> -addition at the exocyclic double bond   |
| Page 11 - 13  | : Ball and stick models of selected stationary points                                         |
| Page 14 - 129 | : Cartesian coordinates, energetics and rovibrational data of all intermediates and TSs       |

Figures 1-6 and Table 1 can be found in the main text.

## Energetics of $\alpha$ - and $\beta$ -pinene ozonolysis

**Table S1:** Calculated ZPE-corrected relative energies (kcal/mol) relative to the primary ozonides for selected structures in the  $\alpha$ -pinene + O<sub>3</sub> reaction, at different levels of theory.

| Structure                         | B3LYP <sup>a)</sup> | MPW1B95 <sup>b)</sup> | CBS-QB3 | Adapted B3LYP <sup>c)</sup> |
|-----------------------------------|---------------------|-----------------------|---------|-----------------------------|
| $\alpha$ -pinene + O <sub>3</sub> | 51.3                | 61.3                  | 61.2    | 61.2                        |
| POZ-1                             | 0.0                 | 0.0                   | 0.0     | 0.0                         |
| POZ-2                             | 1.2                 | 1.3                   | 0.1     | 1.2                         |
| TS1 (POZ-1 $\rightarrow$ CI-1a)   | 15.6                | 21.6                  | 16.7    | 15.6                        |
| TS2 (POZ-2 $\rightarrow$ CI-1b)   | 19.2                | 24.7                  | 20.4    | 19.2                        |
| TS3 (POZ-1 $\rightarrow$ CI-2a)   | 16.2                | 22.1                  | 17.4    | 16.2                        |
| TS4 (POZ-2 $\rightarrow$ CI-2b)   | 17.3                | 23.1                  | 17.9    | 17.3                        |

a) B3LYP/6-311++G(3df,3pd) // B3LYP/6-311G(d,p)

b) MPW1B95/6-311++G(3df,3pd) // MPW1B95/6-31+G(d,p)

c) B3LYP data with the energy for the singlet open-shell O<sub>3</sub> reactant shifted upwards by 9.9 kcal/mol; this matches the relative energy of the reactants with its CBS-QB3 value of 61.2 kcal/mol (see main text).

**Table S2:** Calculated ZPE-corrected relative energies (kcal/mol) relative to the initial reactants for selected structures in the  $\beta$ -pinene + O<sub>3</sub> reaction, at different levels of theory.

| Structure                                               | B3LYP <sup>a)</sup> | MPW1B95 <sup>b)</sup> | CBS-QB3 | Adapted B3LYP <sup>c)</sup> |
|---------------------------------------------------------|---------------------|-----------------------|---------|-----------------------------|
| $\beta$ -pinene + O <sub>3</sub>                        | 48.2                | 58.5                  | 57.0    | 57.0                        |
| POZ-1                                                   | 0.2                 | 1.1                   | 0.6     | 0.2                         |
| POZ-2                                                   | 0.0                 | 0.0                   | 0.0     | 0.0                         |
| TS1 (POZ-1 $\rightarrow$ HCHO + C <sub>9</sub> CI)      | 13.5                | 18.7                  | 14.3    | 13.5                        |
| TS2 (POZ-2 $\rightarrow$ HCHO + C <sub>9</sub> CI)      | 12.9                | 18.0                  | 13.5    | 12.9                        |
| TS3 (POZ-1 $\rightarrow$ H <sub>2</sub> COO + nopinone) | 17.9                | 24.5                  | 19.1    | 17.9                        |
| TS4 (POZ-2 $\rightarrow$ H <sub>2</sub> COO + nopinone) | 17.9                | 24.7                  | 19.1    | 17.9                        |

a) B3LYP/6-311++G(3df,3pd) // B3LYP/6-311G(d,p)

b) MPW1B95/6-311++G(3df,3pd) // MPW1B95/6-31+G(d,p)

c) B3LYP data with the energy for the singlet open-shell O<sub>3</sub> reactant shifted upwards by 8.8 kcal/mol; this matches the relative energy of the reactants with its CBS-QB3 value of 57.0 kcal/mol (see main text).

## Energetics of simplified analogues of $\beta$ -caryophyllene + O<sub>3</sub> intermediates

**Table S3:** Relative energies of various structures in the reaction of acetaldehyde carbonyl oxide (CH<sub>3</sub>CHOO), at different levels of theory. The transition states correspond to the following CH<sub>3</sub>CHOO isomerisation reactions:

|                                                                                            |                                              |
|--------------------------------------------------------------------------------------------|----------------------------------------------|
| syn-CH <sub>3</sub> CHOO $\leftrightarrow$ TS1 $\leftrightarrow$ anti-CH <sub>3</sub> CHOO | (O-rotation out of the plane of symmetry)    |
| syn-CH <sub>3</sub> CHOO $\leftrightarrow$ TS2 $\leftrightarrow$ anti-CH <sub>3</sub> CHOO | (O-pseudo-rotation in the plane of symmetry) |
| syn-CH <sub>3</sub> CHOO $\leftrightarrow$ TS3 $\leftrightarrow$ CH <sub>2</sub> CHOOH     | (1,4-H-shift)                                |
| syn-CH <sub>3</sub> CHOO $\leftrightarrow$ TS4 $\leftrightarrow$ dioxirane                 | (ring closure/breaking)                      |
| anti-CH <sub>3</sub> CHOO $\leftrightarrow$ TS5 $\leftrightarrow$ dioxirane                | (ring closure/breaking)                      |

| Structure                 | B3LYP <sup>a)</sup> | CIPT2+Q <sup>b)</sup> | CCSD(T) <sup>c)</sup> | MRCI+Q <sup>d)</sup> |
|---------------------------|---------------------|-----------------------|-----------------------|----------------------|
| Syn-CH <sub>3</sub> CHOO  | 0.0                 | 0.0                   | 0.0                   | 0.0                  |
| Anti-CH <sub>3</sub> CHOO | 3.0                 | 4.1                   | 3.7                   | 2.2                  |
| TS1 <sup>e)</sup>         | 29.4                | 34.3                  | 32.6                  | 30.5; 33.0           |
| TS2                       | 37.0                | 40.8                  | 41.3                  |                      |
| TS3                       | 15.6                | 12.6                  | 15.7                  | 21.2                 |
| TS4                       | 24.3                | 23.2                  | 23.3                  | 28.4                 |
| TS5                       | 19.7                | 20.8                  | 19.2                  | 22.8                 |

a) B3LYP/cc-pVTZ

b) CIPT2+Q/cc-pVTZ // B3LYP/cc-pVTZ

c) CCSD(T)/cc-pVTZ // B3LYP/cc-pVTZ

d) From Anglada et al., *J. Am. Chem. Soc.* **1996**, *118*, 4636.

e) Geometry optimized using UB3LYP, to accommodate singlet biradical character of TS1.

**Table S4:** O–O bond dissociation energy (kcal/mol) in  $\alpha$ -unsaturated hydroperoxides:  $>C=C(OOH)- \rightarrow \cdot OH + >C^{\cdot}-C(=O)-$ . The structures correspond to the hydroperoxide intermediates found in the  $\beta$ -caryophyllene ozonolysis, but with large alkyl substituents replaced by methyl substituents.

| Species                                                    | B3LYP <sup>a)</sup> | MPW1B95 <sup>b)</sup> | CBS-QB3 |
|------------------------------------------------------------|---------------------|-----------------------|---------|
| <b>ROOH-1a</b> , CH <sub>3</sub> CH=C(CH <sub>3</sub> )OOH | 9.2                 | 13.6                  | 16.7    |
| <b>ROOH-1b</b> , CH <sub>2</sub> =C(CH <sub>3</sub> )OOH   | 14.0                | 18.4                  | 20.5    |
| <b>ROOH-2b</b> , trans-CH <sub>3</sub> CH=CHOOH            | 10.5                | 14.5                  | 17.5    |
| <b>ROOH-2b</b> , cis-CH <sub>3</sub> CH=CHOOH              | 7.0                 | 10.6                  | 13.7    |

a) B3LYP/6-311++G(3df,3pd) // B3LYP/6-311G(d,p)

b) MPW1B95/6-311++G(3df,3pd) // MPW1B95/6-31+G(d,p)

**Table S5:** Calculated barrier height (kcal/mol) for the CH<sub>3</sub>C(O)OCH<sub>3</sub>  $\rightarrow$  C<sub>2</sub>H<sub>6</sub> + CO<sub>2</sub> decomposition using B3LYP/cc-pVDZ and CBS-QB3 levels of theory

| Structure                                  | B3LYP | CBS-QB3 |
|--------------------------------------------|-------|---------|
| Ester CH <sub>3</sub> C(O)OCH <sub>3</sub> | 0.0   | 0.0     |
| TS of CO <sub>2</sub> -elimination         | 98.8  | 96.7    |

**Table S6:** Calculated thermal unimolecular rate coefficients at 298 K of the Criegee intermediates for formation of secondary ozonides (SOZ) or via the ester and hydroperoxide (HP) channels.

| Species      | Rate to SOZ                      | Rate via ester/HP channels |
|--------------|----------------------------------|----------------------------|
| <b>CI-2a</b> | $1.1 \times 10^4 \text{ s}^{-1}$ | $5.3 \text{ s}^{-1}$       |
| <b>CI-1b</b> | $486 \text{ s}^{-1}$             | $42 \text{ s}^{-1}$        |
| <b>CI-1a</b> | $5.3 \text{ s}^{-1}$             | $0.57 \text{ s}^{-1}$      |
| <b>CI-2b</b> | $7.4 \text{ s}^{-1}$             | $1.6 \text{ s}^{-1}$       |

## Relative energies of $\beta$ -caryophyllene + O<sub>3</sub> intermediates and TS

**Table S7:** Calculated ZPE-corrected relative potential energies (kcal/mol) for various structures in the  $\beta$ -caryophyllene ozonolysis, at different levels of theory.

| Structure                               | B3LYP <sup>a)</sup> | MPW1B95 <sup>b)</sup> | Adapted B3LYP <sup>c)</sup> |
|-----------------------------------------|---------------------|-----------------------|-----------------------------|
| O <sub>3</sub> + $\beta$ -caryophyllene | 0.0                 | 0.0                   | 0.0                         |
| POZ-1                                   | -55.5               | -64.2                 | -64.2                       |
| POZ-2                                   | -54.7               | -63.3                 | -63.4                       |
| POZ-3                                   | -48.7               | -59.2                 | -57.4                       |
| POZ-4                                   | -47.3               | -57.7                 | -56.0                       |
| CI-1a                                   | -87.1               |                       | -95.8                       |
| CI-2a                                   | -80.7               |                       | -89.4                       |
| CI-1b                                   | -85.9               |                       | -94.6                       |
| CI-2b                                   | -83.1               |                       | -91.8                       |
| Dioxirane-1                             | -102.4              |                       | -111.1                      |
| Dioxirane-2                             | -99.9               |                       | -108.6                      |
| ROOH-1a                                 | -97.8               |                       | -106.5                      |
| ROOH-1b                                 | -100.4              |                       | -109.1                      |
| ROOH-2b                                 | -103.3              |                       | -112.0                      |
| Rad-1a + OH                             | -93.9               |                       | -102.6                      |
| Rad-1b + OH                             | -84.0               |                       | -92.7                       |
| Rad-2b + OH                             | -91.1               |                       | -99.8                       |
| Acid                                    | -194.5              |                       | -203.2                      |
| Ester                                   | -182.6              |                       | -191.3                      |
| SOZ-1                                   | -106.1              |                       | -114.8                      |
| SOZ-2                                   | -106.8              |                       | -115.5                      |
| TS1                                     |                     |                       | -1.2                        |
| TS2                                     |                     |                       | -0.4                        |
| TS3                                     |                     |                       | 0.4                         |
| TS4                                     |                     |                       | 0.6                         |
| TS5                                     | -36.9               |                       | -45.6                       |
| TS6                                     | -37.2               |                       | -45.9                       |
| TS7                                     | -37.1               |                       | -45.8                       |
| TS8                                     | -33.0               |                       | -41.7                       |
| TS9                                     | -68.5               |                       | -77.2                       |
| TS10                                    | -69.3               |                       | -78.0                       |
| TS11                                    | -64.4               |                       | -73.1                       |
| TS12                                    | -64.5               |                       | -73.2                       |
| TS13                                    | -64.7               |                       | -73.4                       |
| TS14                                    | -64.8               |                       | -73.5                       |
| TS15                                    | -59.1               |                       | -67.8                       |
| TS16                                    | -47.7               |                       | -56.4                       |
| TS17                                    | -76.4               |                       | -85.1                       |
| TS18                                    | -53.1               |                       | -61.8                       |
| TS19                                    | -77.9               |                       | -86.6                       |
| TS20                                    | -74.8               |                       | -83.5                       |
| TS21                                    | -75.3               |                       | -84.0                       |
| TS22                                    | -72.6               |                       | -81.3                       |
| TS23                                    | -69.8               |                       | -78.5                       |

a) B3LYP/6-311++G(3df,3pd) // B3LYP/6-311G(d,p)

b) MPW1B95/6-311++G(3df,3pd) // MPW1B95/6-31+G(d,p)

c) Relative energies based on the B3LYP values<sup>a)</sup>, after correcting the energy for O<sub>3</sub> by 8.7 kcal/mol, to bring the addition energies of **POZ-1** and **POZ-2** in line with the MPW1B95 values. (see main text). TS1, TS2, TS3 and TS4 are the B3LYP<sup>a)</sup> energies at the position of the kinetic bottleneck along the barrierless O<sub>3</sub> addition path, at 300K.

## Triplet bis(oxy) biradical decomposition

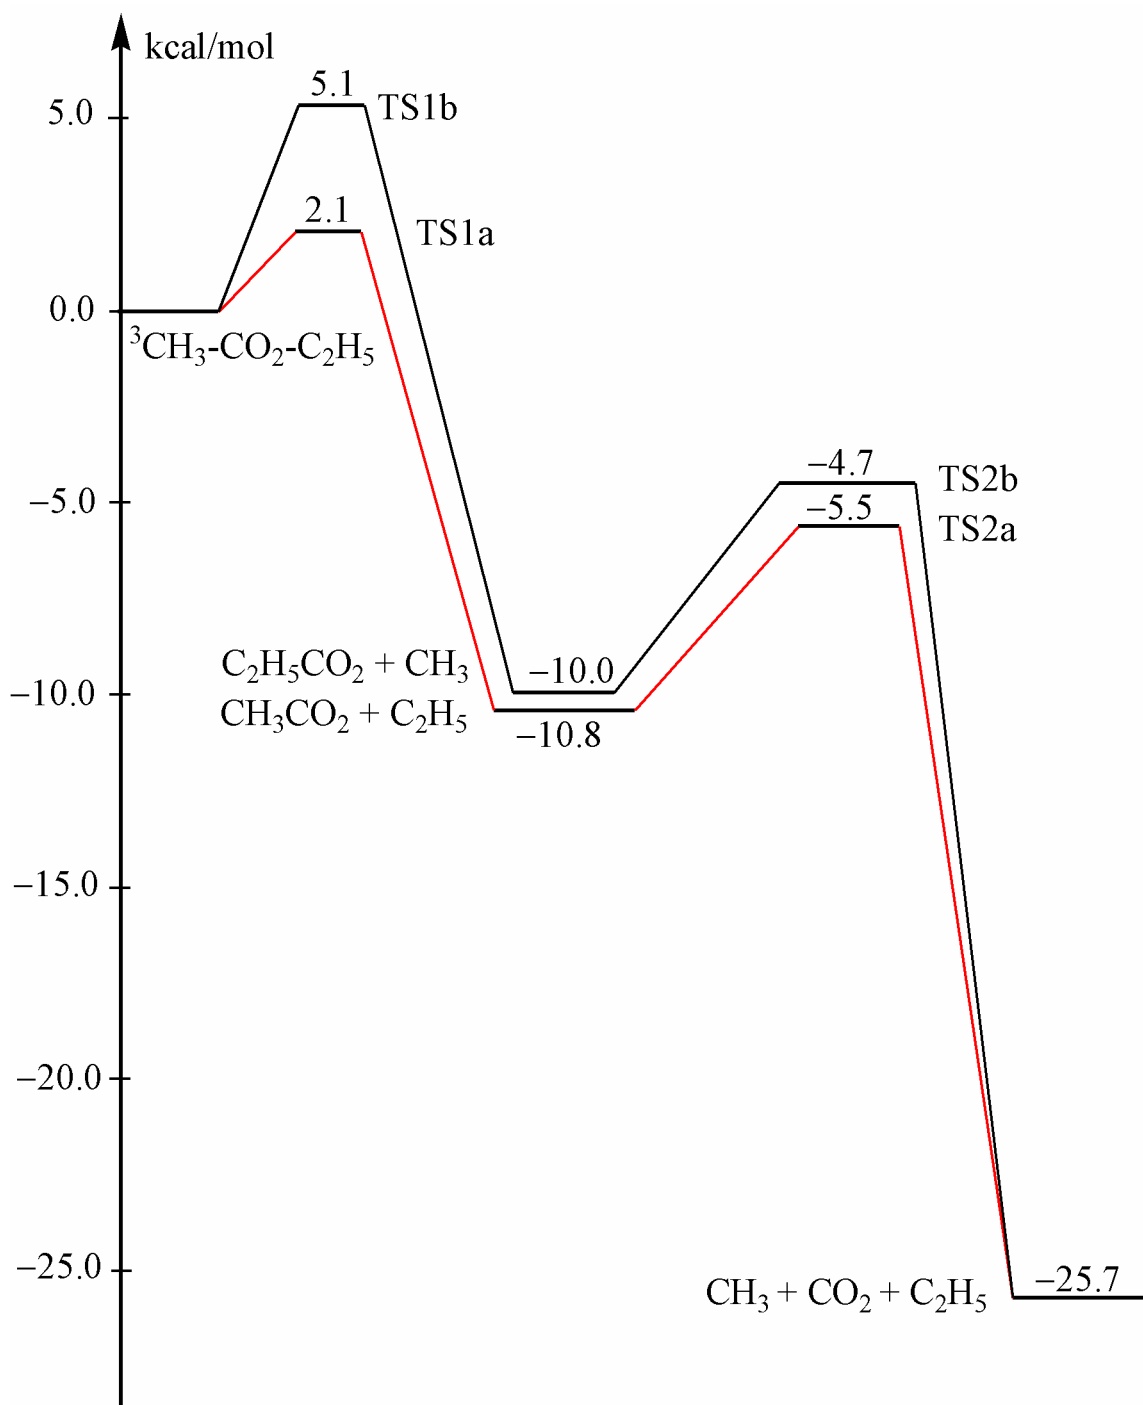

**Figure S1:** Triplet PES for decomposition of triplet methyl ethyl bis(oxy) computed at the CBS-QB3 level of theory.

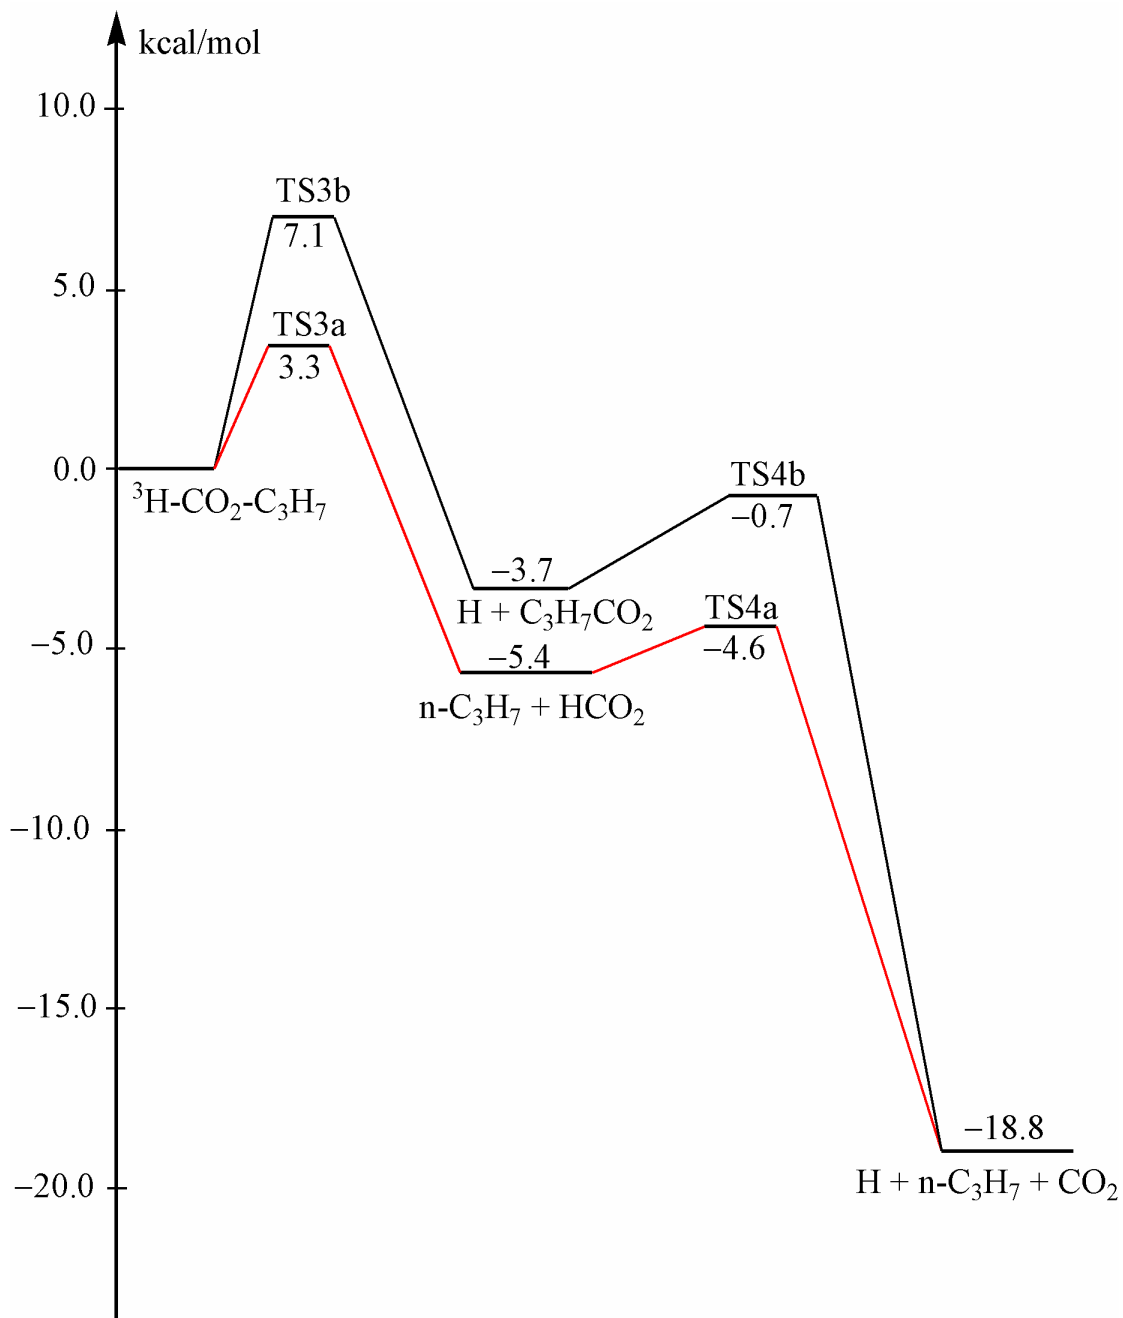

**Figure S2:** Triplet PES for decomposition of triplet n-propyl bis(oxy) computed at the CBS-QB3 level of theory.

## Ozonolysis of $\beta$ -caryophyllene initiated at the exocyclic double bond

### *Potential energy surface*

The O<sub>3</sub> attack on the exocyclic double bond in  $\beta$ -caryophyllene proceeds primarily on one side of the double bond, with a low barrier of  $\sim 0.5$  kcal/mol. Addition on the other side of the molecular plane shows a barrier of about 5 kcal/mol, and is hence not competitive at any relevant reaction conditions. The more favorable O<sub>3</sub>-addition proceeds through two distinct channels, **TS3** and **TS4**, leading to the primary ozonides **POZ-3** and **POZ-4**, respectively (see Fig. S3); these ozonides correspond to the *syn* and *anti* conformers. The conformers, with relative energies 56 to 57 kcal/mol below the initial reactants, interconvert rapidly over a low barrier of *ca.* 2 kcal/mol. The POZs can either be thermalized by collisions with air molecules, or undergo a ring-opening reaction leading to Criegee intermediates **CI-3** or **CI-4** + HCHO, or to  $\beta$ -nocaryophyllone + H<sub>2</sub>COO. The pathways to CI + HCHO are energetically favored by *ca.* 4 kcal/mol compared to those of the  $\beta$ -nocaryophyllone + H<sub>2</sub>COO channel. Thermalized POZ will undergo the same ring opening reaction, on a timescale of a few seconds, leading to thermalized **CI-3/CI-4**.

Chemically activated Criegee intermediates react promptly via the so-called hydroperoxide or ester channels, in competition with collisional stabilization. The lowest exit channel for **CI-3** is the hydroperoxide channel, with a barrier of 20.3 kcal/mol above **CI-3**, ultimately leading to an  $\cdot$ OH radical and a vinyloxy resonance stabilized radical. The barrier to formation of a dioxirane in the ester channel for **CI-3** has a barrier of 23.3 kcal/mol. As no hydrogen atoms are geometrically accessible in **CI-4** for a 1,4-H-shift, only the ester channel is viable in **CI-4**, with a rate-limiting barrier to dioxirane formation of 24.7 kcal/mol above **CI-4**.

Thermalized Criegee intermediates do not readily undergo unimolecular reactions; their atmospheric fate is usually determined by bimolecular reactions with specific co-reactants present, *i.e.*, H<sub>2</sub>O-vapor, aldehydes, carboxylic acids, olefins, ozone, and so on.

### *Product distribution*

The primary product branching ratios as obtained in RRKM/ME analyses are displayed in Fig. S4: 33.5% stabilized POZs, 46.5% **CI-3** plus HCHO, 4.6% **CI-4** plus HCHO, and 15.4%  $\beta$ -nocaryophyllone + H<sub>2</sub>COO. HCHO and  $\beta$ -nocaryophyllone are stable species and will be thermalized. The stabilized POZs dissociate thermally to the same products, but at a longer timescale and without sufficient internal energy to undergo further unimolecular reactions. Incorporating these thermal reactions we then obtain yields of 15%  $\beta$ -nocaryophyllone, 51% HCHO, 34% thermalized CI, 15% chemically activated H<sub>2</sub>COO, and 51% chemically activated CI (84% CI total). The nascent energy distribution of the chemically activated H<sub>2</sub>COO\*, **CI-3\*** and **CI-4\*** intermediates depends on the distribution of the initial internal energy over the molecular degrees of freedom of the Criegee intermediate, the closed-shell co-product, and the degrees of freedom for their relative motion. As the O<sub>3</sub> addition on the exocyclic double bond has only a minor contribution in the total  $\beta$ -



caryophyllene ozonolysis, and in view of the uncertainties involved in such an energy redistribution analysis due to the error margins on the barrier heights, the (absolute) rigidities of the structures involved, and potential impact of dynamic effects, we opted to cease the product distribution analysis at this point.

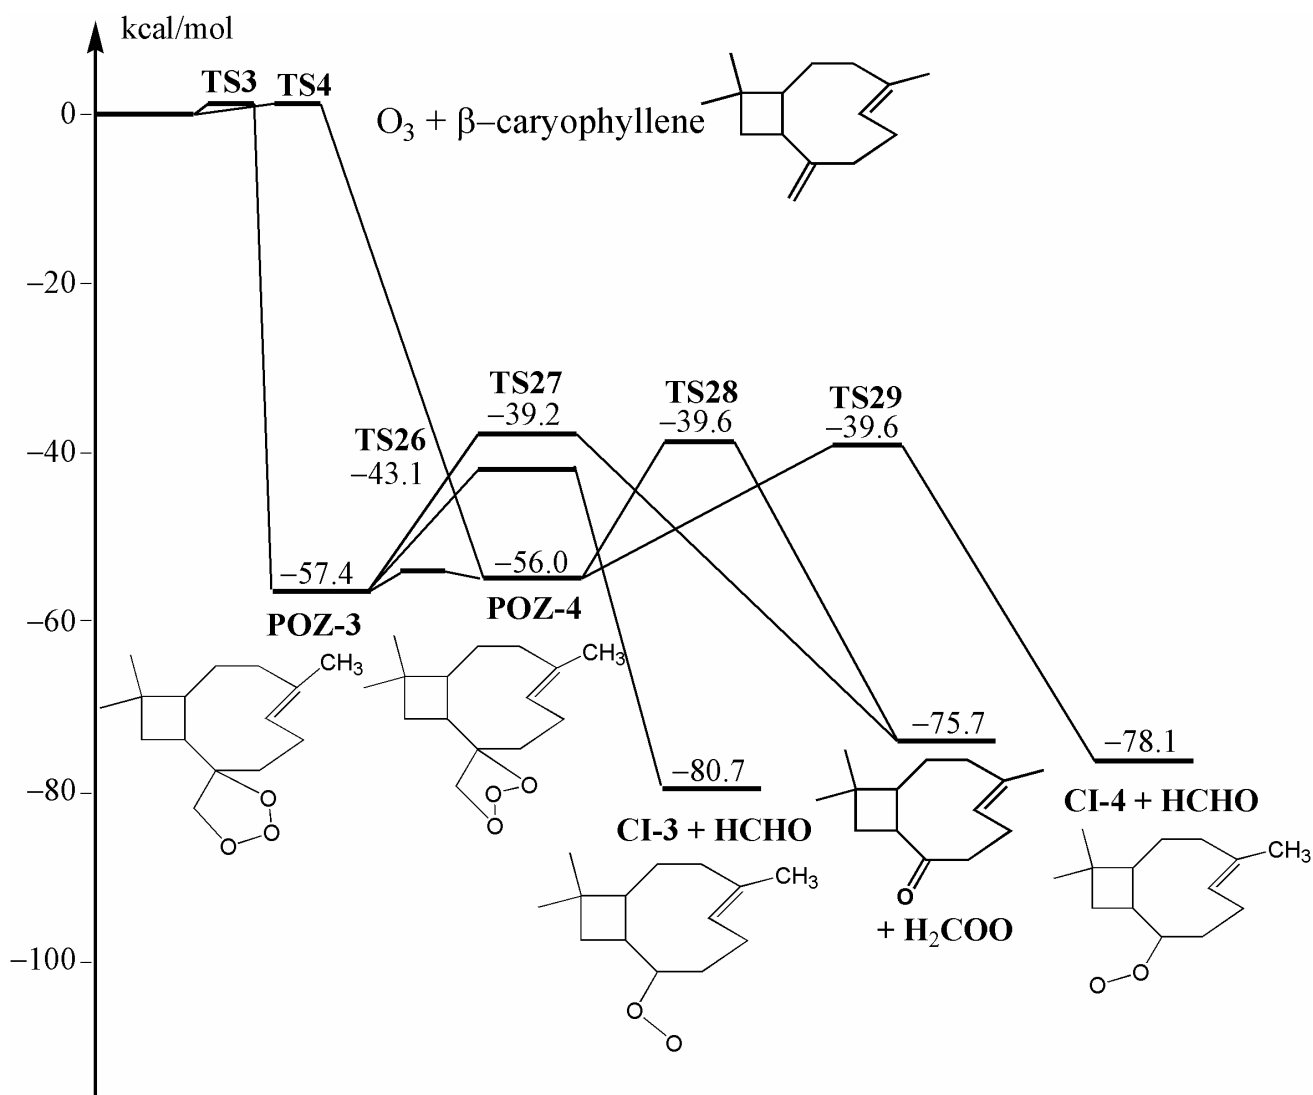

**Figure S3:** Schematic profile of the lowest-lying singlet potential energy surface for the ozonolysis of  $\beta$ -caryophyllene initiated at the exocyclic  $>C=C<$  bond.

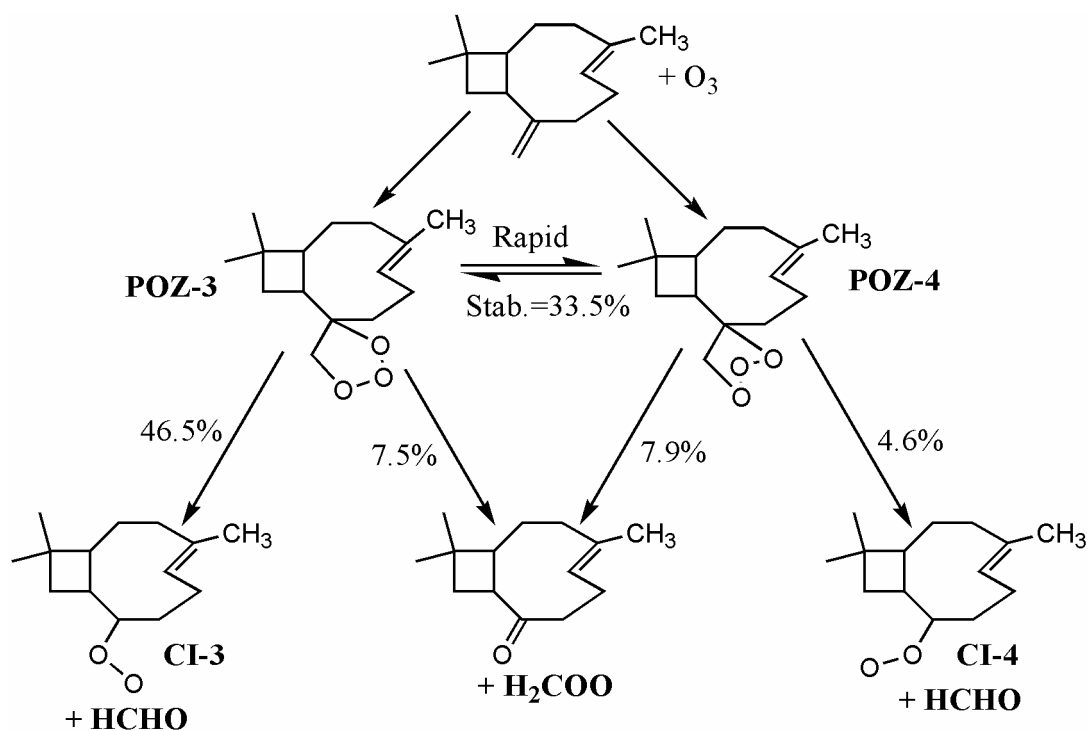

**Figure S4:** Schematic reaction mechanism and first generation product distribution from the chemically activated reactions following the ozonolysis of  $\beta$ -caryophyllene at the exocyclic  $>C=C<$  bond. 'Stab' indicates the yield of collisionally stabilized intermediates.

**Ball and Stick models of B3LYP geometries of selected stationary points**

|                                                                                                                       |                                                                                                                       |                                                                                                                       |
|-----------------------------------------------------------------------------------------------------------------------|-----------------------------------------------------------------------------------------------------------------------|-----------------------------------------------------------------------------------------------------------------------|
| 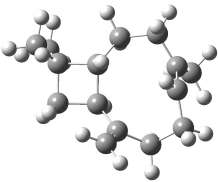 <p><b>b-caryophyllene</b></p>       |  <p><b>POZ-1 (<i>syn</i>)</b></p>    |  <p><b>POZ-2 (<i>anti</i>)</b></p>  |
|  <p><b>POZ-3</b></p>                 |  <p><b>POZ-4</b></p>                 |  <p><b>CI-1a (<i>syn</i>)</b></p>   |
|  <p><b>CI-2a (<i>anti</i>)</b></p> |  <p><b>CI-1b (<i>anti</i>)</b></p> |  <p><b>CI-2b (<i>syn</i>)</b></p> |
|  <p><b>Dioxirane-1a</b></p>        |  <p><b>Dioxirane-2a</b></p>        |  <p><b>Dioxirane-1b</b></p>       |
|  <p><b>Dioxirane-2b</b></p>        |                                                                                                                       |                                                                                                                       |

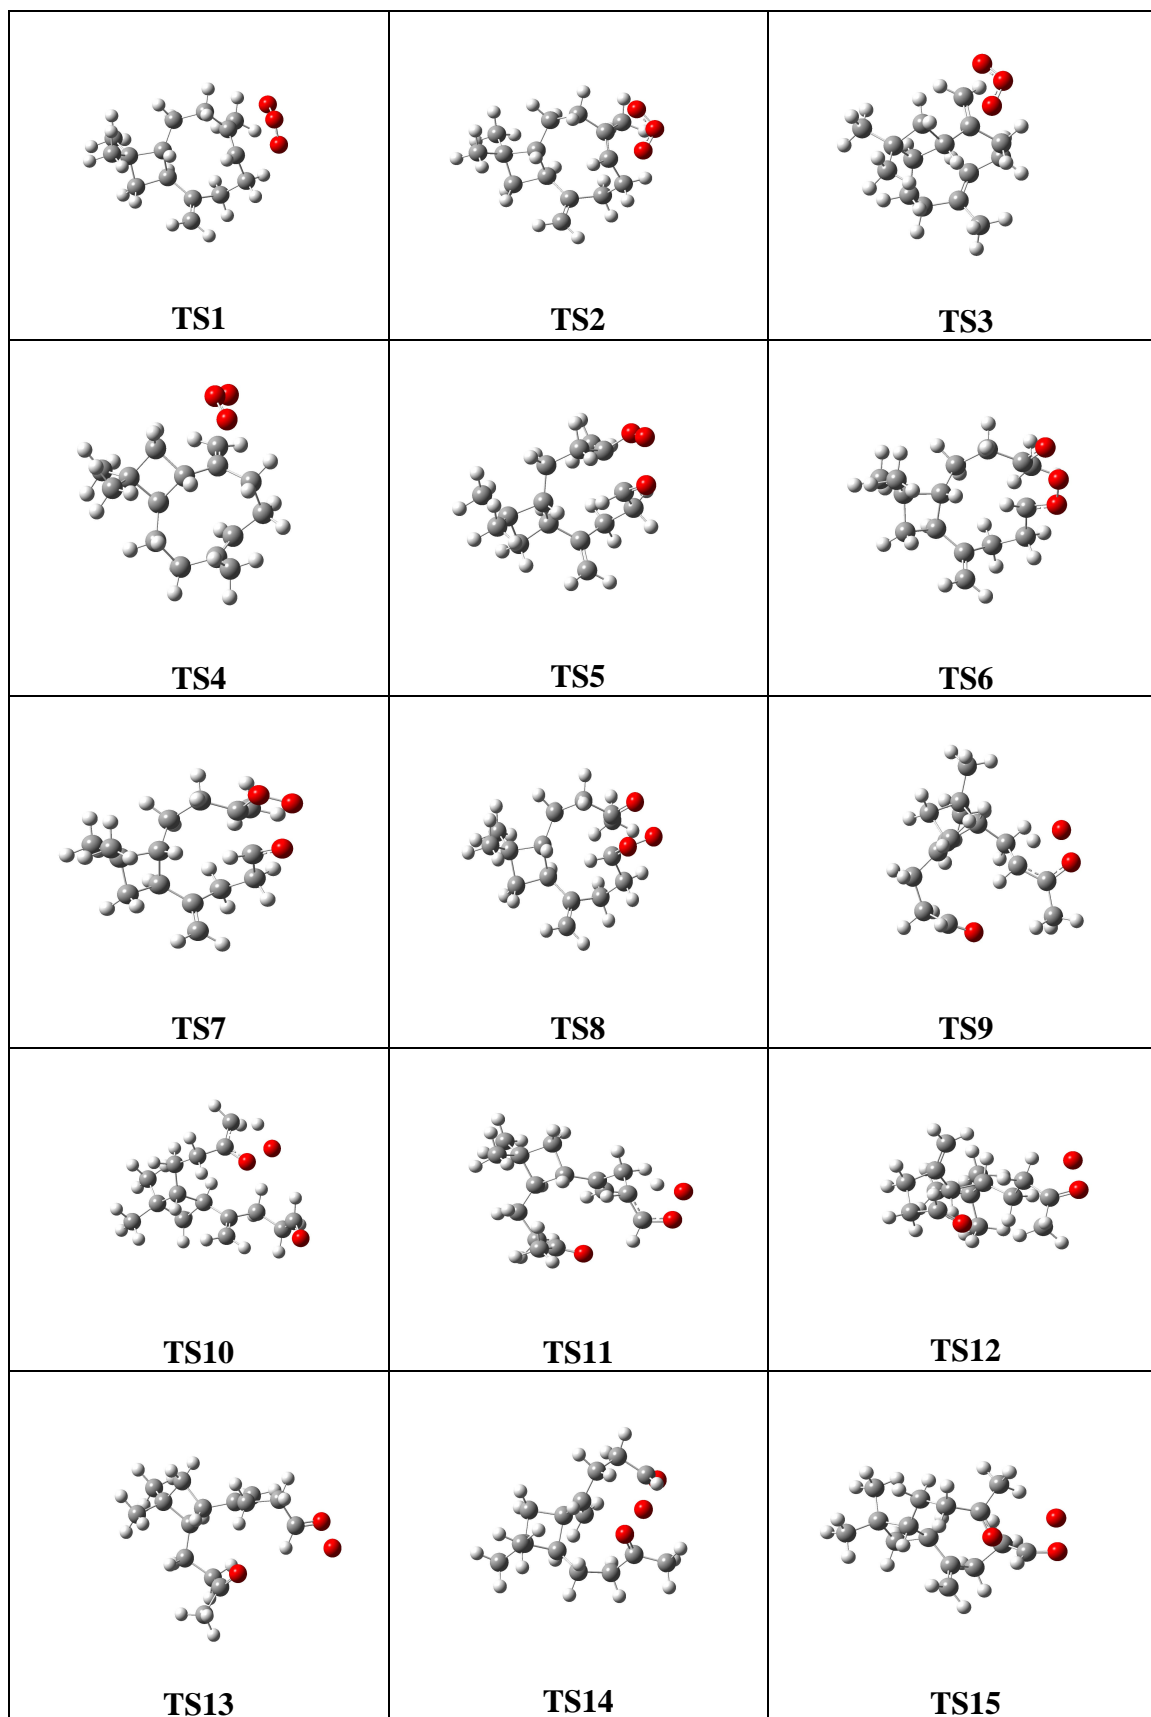

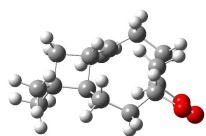

**TS16**

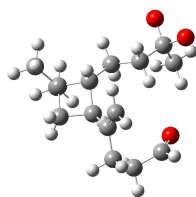

**TS17**

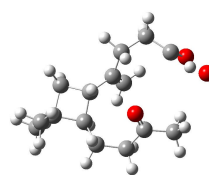

**TS18**

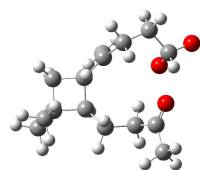

**TS19**

## Cartesian coordinates, energetics and rovibrational data

**b-caryophyllene:** B3LYP/6-311G(d,p)

-----  
E(RB+HF-LYP/6-311G(d,p)) (Hartree): -586.140759656

Electronic state : 1-A

Cartesian coordinates (Angs):

|   |           |           |           |
|---|-----------|-----------|-----------|
| C | -0.491052 | 0.813851  | 0.578064  |
| C | -0.977309 | -0.361284 | -0.372040 |
| C | -1.964368 | 1.305912  | 0.629723  |
| C | -2.458953 | -0.054986 | 0.067256  |
| C | -2.987768 | -0.962502 | 1.185156  |
| C | -3.471807 | 0.018206  | -1.074365 |
| C | 0.588591  | 1.810074  | 0.177983  |
| C | 1.990277  | 1.640018  | 0.762808  |
| C | 2.988373  | 0.935545  | -0.202911 |
| C | 0.347758  | 2.835410  | -0.643670 |
| C | 2.283531  | -0.210845 | -0.871918 |
| C | 1.973041  | -1.389365 | -0.324561 |
| C | 0.834822  | -2.184072 | -0.917250 |
| C | -0.502980 | -1.814772 | -0.229708 |
| C | 2.552893  | -1.910528 | 0.965585  |
| H | -0.217072 | 0.383513  | 1.546653  |
| H | -0.849323 | -0.036309 | -1.410690 |
| H | -2.154356 | 2.124351  | -0.066113 |
| H | -2.340285 | 1.600240  | 1.613248  |
| H | -3.932933 | -0.563665 | 1.567762  |
| H | -2.294825 | -1.027074 | 2.028532  |
| H | -3.178527 | -1.979536 | 0.830118  |
| H | -4.441382 | 0.384015  | -0.718783 |
| H | -3.636033 | -0.968043 | -1.522989 |
| H | -3.129001 | 0.691835  | -1.865141 |
| H | 1.924112  | 1.049704  | 1.681739  |
| H | 2.390317  | 2.619394  | 1.043781  |
| H | 3.873051  | 0.621869  | 0.359358  |
| H | 3.329384  | 1.652977  | -0.954569 |
| H | 1.128817  | 3.545154  | -0.897699 |
| H | -0.619114 | 3.010423  | -1.100030 |
| H | 1.792886  | 0.042442  | -1.808666 |
| H | 0.998901  | -3.262884 | -0.808607 |
| H | 0.752565  | -1.977664 | -1.989258 |
| H | -1.283412 | -2.458181 | -0.655758 |
| H | -0.448375 | -2.080244 | 0.831754  |
| H | 1.785976  | -2.012374 | 1.742226  |
| H | 3.344882  | -1.272632 | 1.359712  |
| H | 2.973454  | -2.911279 | 0.812524  |

Rotational constants (GHz): 0.8435600 0.4928600 0.3696000

Vibrational harmonic frequencies (cm-1):

|          |          |          |
|----------|----------|----------|
| 44.3928  | 55.3890  | 83.4793  |
| 118.2324 | 162.7221 | 174.0759 |
| 204.7348 | 215.9773 | 232.8778 |
| 243.2627 | 268.8709 | 285.9296 |
| 299.2491 | 303.0388 | 329.7872 |
| 352.0091 | 394.9096 | 408.8014 |
| 432.7248 | 447.9046 | 485.5876 |
| 507.0626 | 551.4403 | 560.7500 |
| 587.1501 | 633.5021 | 721.2542 |
| 742.8165 | 750.1914 | 814.0212 |

|           |           |           |
|-----------|-----------|-----------|
| 823.9777  | 843.7885  | 872.7255  |
| 895.9345  | 903.9761  | 917.0185  |
| 920.2959  | 943.0069  | 952.8388  |
| 964.7672  | 978.5417  | 991.8637  |
| 999.5162  | 1009.7776 | 1015.5198 |
| 1036.2536 | 1041.3174 | 1061.6741 |
| 1078.4770 | 1100.3021 | 1133.4624 |
| 1156.8279 | 1164.0170 | 1195.6661 |
| 1200.6260 | 1207.7368 | 1226.2138 |
| 1243.0890 | 1252.4238 | 1255.3129 |
| 1263.2912 | 1280.3376 | 1306.8319 |
| 1328.7680 | 1334.0801 | 1353.3997 |
| 1361.5758 | 1376.6960 | 1388.9856 |
| 1398.9760 | 1403.4819 | 1420.3273 |
| 1421.6347 | 1447.3605 | 1477.0661 |
| 1481.8027 | 1486.1785 | 1487.2196 |
| 1492.2224 | 1494.9771 | 1496.0938 |
| 1499.4788 | 1504.0401 | 1507.4602 |
| 1509.9935 | 1692.4067 | 1733.3033 |
| 3000.8110 | 3007.5066 | 3009.4402 |
| 3015.0482 | 3018.3441 | 3021.4332 |
| 3024.3108 | 3030.7699 | 3033.9740 |
| 3040.1025 | 3046.6973 | 3049.5636 |
| 3057.3415 | 3059.7695 | 3064.4713 |
| 3075.0141 | 3076.4180 | 3078.6266 |
| 3087.7334 | 3103.2781 | 3111.1700 |
| 3131.5758 | 3132.1967 | 3207.4425 |

Zero-point correction (Hartree): 0.353640

$\beta$ -caryophyllene: MPW1B95/6-31+G(d,p)

-----  
E(RmPW+HF-B95/6-31+G(d,p)) (Hartree): -585.701402547

Electronic state : 1-A

Cartesian coordinates (Angs):

|   |           |           |           |
|---|-----------|-----------|-----------|
| C | -0.435587 | 0.786082  | 0.572033  |
| C | -0.980590 | -0.318871 | -0.397678 |
| C | -1.866858 | 1.354005  | 0.629451  |
| C | -2.424037 | 0.035116  | 0.067765  |
| C | -2.936610 | -0.858571 | 1.189015  |
| C | -3.458071 | 0.142790  | -1.035489 |
| C | 0.680148  | 1.727997  | 0.182797  |
| C | 2.056909  | 1.511328  | 0.780361  |
| C | 3.016802  | 0.825554  | -0.210760 |
| C | 0.493013  | 2.738902  | -0.668886 |
| C | 2.274216  | -0.281094 | -0.892556 |
| C | 1.860531  | -1.409755 | -0.311383 |
| C | 0.741119  | -2.182487 | -0.939631 |
| C | -0.592006 | -1.786921 | -0.294266 |
| C | 2.304925  | -1.861864 | 1.046387  |
| H | -0.179688 | 0.314901  | 1.527637  |
| H | -0.838214 | 0.034234  | -1.426465 |
| H | -2.001927 | 2.177394  | -0.072504 |
| H | -2.230447 | 1.673885  | 1.608608  |
| H | -3.862881 | -0.445269 | 1.595989  |
| H | -2.221071 | -0.932402 | 2.011477  |
| H | -3.149577 | -1.871122 | 0.838094  |
| H | -4.406857 | 0.527850  | -0.651845 |
| H | -3.655351 | -0.835136 | -1.484487 |
| H | -3.117734 | 0.812910  | -1.828048 |
| H | 1.964221  | 0.884246  | 1.671201  |

|   |           |           |           |
|---|-----------|-----------|-----------|
| H | 2.477765  | 2.466543  | 1.105222  |
| H | 3.905751  | 0.472669  | 0.319624  |
| H | 3.357203  | 1.554261  | -0.948709 |
| H | 1.306329  | 3.408382  | -0.926405 |
| H | -0.457535 | 2.934026  | -1.149182 |
| H | 1.862233  | -0.047769 | -1.870666 |
| H | 0.884833  | -3.262502 | -0.831722 |
| H | 0.698087  | -1.964112 | -2.010298 |
| H | -1.390521 | -2.373252 | -0.764280 |
| H | -0.591015 | -2.082368 | 0.759968  |
| H | 1.502732  | -1.758845 | 1.784867  |
| H | 3.164022  | -1.300809 | 1.412368  |
| H | 2.576213  | -2.920992 | 1.026586  |

Rotational constants (GHz): 0.8745300 0.5053800 0.3850900

Vibrational harmonic frequencies (cm-1):

|           |           |           |
|-----------|-----------|-----------|
| 59.2397   | 64.3701   | 108.6975  |
| 119.9403  | 146.6194  | 166.4571  |
| 207.9209  | 219.4659  | 239.4263  |
| 245.8877  | 281.1602  | 306.9692  |
| 314.1783  | 315.6785  | 327.9290  |
| 351.8707  | 392.5700  | 408.0980  |
| 434.8154  | 443.8206  | 485.1381  |
| 512.8489  | 554.1117  | 565.9412  |
| 587.9450  | 642.6484  | 727.4438  |
| 761.0562  | 770.1417  | 823.9302  |
| 833.4705  | 869.6626  | 887.3557  |
| 906.0681  | 916.6752  | 926.5340  |
| 935.6302  | 959.8575  | 960.1959  |
| 980.9933  | 1003.3518 | 1008.0020 |
| 1020.2444 | 1023.3475 | 1029.3099 |
| 1048.0271 | 1056.9513 | 1061.3350 |
| 1101.2451 | 1132.2130 | 1143.7981 |
| 1173.1803 | 1176.7641 | 1200.3214 |
| 1216.0357 | 1230.4491 | 1235.0635 |
| 1249.8923 | 1259.8669 | 1263.4419 |
| 1274.1246 | 1304.3615 | 1324.3039 |
| 1335.1332 | 1348.3733 | 1365.5376 |
| 1373.6284 | 1382.7397 | 1398.4507 |
| 1405.1090 | 1416.7277 | 1426.1328 |
| 1431.3000 | 1452.1490 | 1473.5668 |
| 1481.6780 | 1485.7284 | 1489.2175 |
| 1493.3403 | 1495.3441 | 1501.3242 |
| 1504.6239 | 1513.1651 | 1513.4060 |
| 1518.8016 | 1731.3730 | 1775.2089 |
| 3047.5273 | 3052.0107 | 3056.0174 |
| 3056.8753 | 3062.9692 | 3065.0025 |
| 3067.7176 | 3076.2567 | 3083.3243 |
| 3095.6457 | 3096.9575 | 3115.9303 |
| 3118.6828 | 3121.3873 | 3131.8782 |
| 3138.1213 | 3141.7758 | 3144.4032 |
| 3146.2147 | 3159.5106 | 3170.4399 |
| 3185.4329 | 3186.9204 | 3270.8840 |

Zero-point correction (Hartree): 0.358589

**O3:** UB3LYP/6-311G(d,p)

-----  
E(UB+HF-LYP/6-311G(d,p)) (Hartree): -225.473809652

Point group : C2V

Cartesian coordinates (Angs):

|   |          |          |           |
|---|----------|----------|-----------|
| O | 0.000000 | 1.088099 | -0.225319 |
| O | 0.000000 | 0.000000 | 0.450637  |



O 0.000000 -1.088099 -0.225319  
 Rotational constants (GHz): 103.7265200 13.3434700 11.8226000  
 Vibrational harmonic frequencies (cm-1):  
 709.9044 1020.3796 1048.2558  
 Zero-point correction (Hartree): 0.006330

O3: UMPW1B95/6-31+G(d,p)

-----  
 E(UmPW+HF-B95/6-31+G(d,p)) (Hartree): -225.345928869  
 Point group : C2V  
 Cartesian coordinates (Angs):  
 O 0.000000 1.075328 -0.223535  
 O 0.000000 0.000000 0.447070  
 O 0.000000 -1.075328 -0.223535  
 Rotational constants (GHz): 105.3884400 13.6622900 12.0944000  
 Vibrational harmonic frequencies (cm-1):  
 725.1136 1094.2254 1193.9475  
 Zero-point correction (Hartree): 0.006865

POZ-1

-----  
 E(RB+HF-LYP/6-311G(d,p)) (Hartree): -811.711688887  
 Electronic state : 1-A  
 Cartesian coordinates (Angs):  
 C -1.689347 0.946944 0.457349  
 C -1.414705 -0.490135 -0.120975  
 C -3.089047 0.882388 -0.197137  
 C -2.973680 -0.669677 -0.253442  
 C -3.631453 -1.328367 0.965197  
 C -3.448057 -1.343392 -1.539008  
 C -0.746070 2.093906 0.207315  
 C 0.519168 2.117153 1.057344  
 C 1.825924 1.810971 0.300520  
 C -0.997024 3.070140 -0.667121  
 C 1.849259 0.475472 -0.432116  
 C 0.828848 -1.853999 0.102136  
 C -0.587721 -1.543843 0.631337  
 C 2.315217 -0.747412 1.867778  
 H -1.803647 0.846138 1.544021  
 H -1.027946 -0.377353 -1.139345  
 H -3.090271 1.307905 -1.203150  
 H -3.923047 1.308293 0.366016  
 H -4.719308 -1.225990 0.900759  
 H -3.314255 -0.874276 1.907787  
 H -3.406054 -2.397744 1.017193  
 H -4.538029 -1.289850 -1.632628  
 H -3.168254 -2.402615 -1.556868  
 H -3.011710 -0.866750 -2.421421  
 H 0.403095 1.422552 1.892896  
 H 0.628194 3.109075 1.506021  
 H 2.675566 1.870832 0.985200  
 H 1.981186 2.584549 -0.457412  
 H -0.307838 3.897889 -0.802445  
 H -1.893484 3.088950 -1.274587  
 H 0.981393 0.397245 -1.090972  
 H 1.144414 -2.812522 0.526533  
 H 0.785587 -2.000230 -0.982033  
 H -1.133488 -2.491914 0.570867  
 H -0.553224 -1.305837 1.700360  
 H 1.465771 -0.382186 2.445426

|                                          |           |           |           |
|------------------------------------------|-----------|-----------|-----------|
| H                                        | 3.164302  | -0.081027 | 2.020471  |
| H                                        | 2.586210  | -1.731377 | 2.257812  |
| C                                        | 1.982867  | -0.874040 | 0.383696  |
| O                                        | 3.189622  | -1.451640 | -0.189476 |
| O                                        | 3.232690  | -0.900917 | -1.518081 |
| O                                        | 3.028909  | 0.493755  | -1.249662 |
| Rotational constants (GHz):              | 0.6413000 | 0.3035500 | 0.2532200 |
| Vibrational harmonic frequencies (cm-1): |           |           |           |
| 42.7129                                  | 59.2519   |           | 87.0877   |
| 99.0175                                  | 150.6236  |           | 156.1678  |
| 188.9906                                 | 209.4754  |           | 216.5239  |
| 228.8946                                 | 235.0528  |           | 238.5675  |
| 266.1297                                 | 287.7700  |           | 306.1364  |
| 313.1316                                 | 340.4441  |           | 342.2071  |
| 356.2961                                 | 396.3746  |           | 410.5649  |
| 426.0338                                 | 449.9143  |           | 468.5208  |
| 481.5341                                 | 523.4108  |           | 553.2881  |
| 561.6918                                 | 598.0468  |           | 640.3627  |
| 698.1976                                 | 712.4943  |           | 731.4631  |
| 731.6512                                 | 759.9367  |           | 813.7295  |
| 825.3014                                 | 849.3276  |           | 866.1305  |
| 889.8470                                 | 897.8299  |           | 920.1388  |
| 926.3434                                 | 927.8142  |           | 932.1230  |
| 950.6162                                 | 959.5222  |           | 990.6024  |
| 1001.6070                                | 1005.1840 |           | 1018.6578 |
| 1020.1427                                | 1025.9995 |           | 1038.8616 |
| 1061.5450                                | 1094.6627 |           | 1103.6466 |
| 1116.6555                                | 1142.4826 |           | 1160.3788 |
| 1165.6531                                | 1184.2747 |           | 1199.2333 |
| 1215.0309                                | 1225.5537 |           | 1240.1774 |
| 1251.7264                                | 1263.0783 |           | 1274.0029 |
| 1281.1335                                | 1307.6558 |           | 1318.5256 |
| 1344.8125                                | 1351.5667 |           | 1368.6252 |
| 1379.7429                                | 1383.4154 |           | 1392.8275 |
| 1398.2603                                | 1407.4243 |           | 1408.9131 |
| 1418.4104                                | 1421.5293 |           | 1452.0264 |
| 1478.3276                                | 1483.5235 |           | 1485.6719 |
| 1488.9253                                | 1490.8304 |           | 1493.8150 |
| 1498.5072                                | 1507.1047 |           | 1508.3166 |
| 1509.0885                                | 1514.2257 |           | 1701.5421 |
| 3002.0447                                | 3009.6133 |           | 3015.4083 |
| 3022.7100                                | 3025.3077 |           | 3028.5830 |
| 3038.2587                                | 3044.3402 |           | 3046.1299 |
| 3047.7663                                | 3051.5333 |           | 3062.5670 |
| 3066.8610                                | 3070.0595 |           | 3075.0122 |
| 3078.5287                                | 3081.0699 |           | 3089.5809 |
| 3089.8232                                | 3096.2530 |           | 3114.2310 |
| 3132.9056                                | 3135.0560 |           | 3212.7466 |
| Zero-point correction (Hartree):         | 0.367370  |           |           |

**POZ-1**

-----  
E(RmPW+HF-B95/6-31+G(d,p)) (Hartree): -811.158513398

Electronic state : 1-A

Cartesian coordinates (Angs):

|   |           |           |           |
|---|-----------|-----------|-----------|
| C | -1.689671 | 0.961344  | 0.426259  |
| C | -1.403153 | -0.468152 | -0.111288 |
| C | -3.044211 | 0.888584  | -0.284109 |
| C | -2.942693 | -0.651366 | -0.251516 |
| C | -3.596235 | -1.231138 | 0.995034  |
| C | -3.406218 | -1.399356 | -1.485294 |

|   |           |           |           |
|---|-----------|-----------|-----------|
| C | -0.718405 | 2.073946  | 0.204518  |
| C | 0.502726  | 2.055808  | 1.098236  |
| C | 1.814780  | 1.775281  | 0.368711  |
| C | -0.900165 | 3.035903  | -0.700652 |
| C | 1.816747  | 0.472872  | -0.398737 |
| C | 0.803736  | -1.837135 | 0.116569  |
| C | -0.583038 | -1.491788 | 0.666485  |
| C | 2.352639  | -0.790307 | 1.833879  |
| H | -1.852871 | 0.874573  | 1.507330  |
| H | -1.013594 | -0.371335 | -1.131152 |
| H | -2.976397 | 1.251052  | -1.312337 |
| H | -3.900465 | 1.357899  | 0.204030  |
| H | -4.681223 | -1.117937 | 0.934960  |
| H | -3.262022 | -0.735898 | 1.909143  |
| H | -3.383236 | -2.297869 | 1.098125  |
| H | -4.494091 | -1.359209 | -1.584786 |
| H | -3.118848 | -2.453588 | -1.435328 |
| H | -2.968578 | -0.974137 | -2.390989 |
| H | 0.352979  | 1.318535  | 1.890524  |
| H | 0.598662  | 3.020475  | 1.602273  |
| H | 2.651371  | 1.800236  | 1.068848  |
| H | 1.988969  | 2.571096  | -0.359709 |
| H | -0.178591 | 3.835639  | -0.827175 |
| H | -1.772119 | 3.064564  | -1.341326 |
| H | 0.927568  | 0.417795  | -1.031983 |
| H | 1.112650  | -2.799356 | 0.533361  |
| H | 0.736287  | -1.978193 | -0.966795 |
| H | -1.146723 | -2.430081 | 0.665750  |
| H | -0.522037 | -1.201077 | 1.721082  |
| H | 1.532485  | -0.416246 | 2.444636  |
| H | 3.219941  | -0.145964 | 1.968675  |
| H | 2.611378  | -1.785817 | 2.197094  |
| C | 1.968226  | -0.881389 | 0.371003  |
| O | 3.134200  | -1.443801 | -0.261423 |
| O | 3.115029  | -0.869335 | -1.555155 |
| O | 2.961785  | 0.497662  | -1.240776 |

Rotational constants (GHz): 0.6524000 0.3113400 0.2607800

Vibrational harmonic frequencies (cm<sup>-1</sup>):

|           |           |           |
|-----------|-----------|-----------|
| 47.9234   | 62.7174   | 96.4050   |
| 103.0818  | 139.8231  | 144.1465  |
| 181.7641  | 195.5721  | 204.6486  |
| 224.6940  | 240.1884  | 246.5087  |
| 276.8529  | 301.0998  | 304.0613  |
| 320.6445  | 342.7071  | 348.1815  |
| 360.9325  | 394.5349  | 408.9353  |
| 429.9091  | 460.6789  | 475.7935  |
| 493.1462  | 527.5707  | 561.1842  |
| 563.0923  | 612.0641  | 647.2770  |
| 719.0438  | 734.2038  | 739.4227  |
| 749.6693  | 823.2752  | 839.9427  |
| 848.6725  | 866.8641  | 888.7897  |
| 906.8047  | 916.0068  | 931.7073  |
| 936.2507  | 945.0791  | 958.3829  |
| 977.0793  | 992.7604  | 1012.1074 |
| 1019.4367 | 1026.8941 | 1033.2822 |
| 1042.5911 | 1054.5044 | 1071.7917 |
| 1083.7651 | 1120.5030 | 1130.5321 |
| 1145.4742 | 1165.5681 | 1173.0113 |
| 1182.6414 | 1195.9521 | 1218.6528 |
| 1233.4645 | 1234.9867 | 1254.5467 |
| 1265.3817 | 1267.8390 | 1285.0789 |

|           |           |           |
|-----------|-----------|-----------|
| 1306.8722 | 1325.9072 | 1330.6126 |
| 1340.5839 | 1350.0876 | 1370.5655 |
| 1387.1061 | 1390.1216 | 1405.9221 |
| 1409.1508 | 1414.0036 | 1425.0237 |
| 1427.1220 | 1432.4018 | 1465.6993 |
| 1477.6331 | 1483.3884 | 1487.7398 |
| 1491.1447 | 1494.8117 | 1496.0965 |
| 1501.7287 | 1507.2587 | 1512.8968 |
| 1515.5571 | 1519.2257 | 1743.5164 |
| 3048.0772 | 3057.0228 | 3058.8733 |
| 3065.2551 | 3069.4447 | 3071.8240 |
| 3084.7121 | 3092.8317 | 3095.9085 |
| 3099.0434 | 3100.7130 | 3111.4718 |
| 3125.1019 | 3129.5708 | 3135.0572 |
| 3144.6121 | 3147.5065 | 3149.2705 |
| 3152.5290 | 3153.0012 | 3179.3586 |
| 3188.6048 | 3198.3555 | 3276.0088 |

Zero-point correction (Hartree): 0.372832

### POZ-2

-----

E(RB+HF-LYP/6-311G(d,p)) (Hartree): -811.710771569

Electronic state : 1-A

Cartesian coordinates (Angs):

|   |           |           |           |
|---|-----------|-----------|-----------|
| C | -1.682086 | 0.938787  | 0.491937  |
| C | -1.461615 | -0.479761 | -0.152411 |
| C | -3.101818 | 0.935061  | -0.121660 |
| C | -3.027751 | -0.615125 | -0.247418 |
| C | -3.666944 | -1.310204 | 0.960818  |
| C | -3.554917 | -1.220281 | -1.546377 |
| C | -0.718767 | 2.073039  | 0.256598  |
| C | 0.556928  | 2.053177  | 1.090992  |
| C | 1.846446  | 1.725360  | 0.310520  |
| C | -0.959159 | 3.071689  | -0.595507 |
| C | 1.823215  | 0.436390  | -0.510389 |
| C | 0.743240  | -1.900710 | -0.070870 |
| C | -0.643335 | -1.588662 | 0.526885  |
| C | 2.248179  | -0.874518 | 1.730624  |
| H | -1.766672 | 0.797125  | 1.576515  |
| H | -1.099622 | -0.333423 | -1.175906 |
| H | -3.122530 | 1.403461  | -1.108141 |
| H | -3.907447 | 1.356601  | 0.484353  |
| H | -4.753360 | -1.180098 | 0.931938  |
| H | -3.313051 | -0.903752 | 1.912102  |
| H | -3.466189 | -2.385771 | 0.961474  |
| H | -4.645481 | -1.137464 | -1.605091 |
| H | -3.301781 | -2.283844 | -1.618777 |
| H | -3.132723 | -0.714883 | -2.419704 |
| H | 0.429731  | 1.353910  | 1.920639  |
| H | 0.696535  | 3.036775  | 1.549695  |
| H | 2.700835  | 1.717064  | 0.992321  |
| H | 2.029774  | 2.529965  | -0.407041 |
| H | -0.253918 | 3.887286  | -0.721338 |
| H | -1.861263 | 3.122574  | -1.192716 |
| H | 0.956774  | 0.439726  | -1.173447 |
| H | 1.051325  | -2.891540 | 0.279542  |
| H | 0.663958  | -1.973988 | -1.160180 |
| H | -1.216014 | -2.518371 | 0.440992  |
| H | -0.563905 | -1.401680 | 1.603205  |
| H | 1.469838  | -0.387696 | 2.318611  |
| H | 3.184384  | -0.335411 | 1.877618  |

|   |          |           |           |
|---|----------|-----------|-----------|
| H | 2.377623 | -1.889105 | 2.113727  |
| C | 1.911237 | -0.953026 | 0.241756  |
| O | 3.039550 | -1.577724 | -0.428917 |
| O | 3.881432 | -0.463885 | -0.733140 |
| O | 2.949777 | 0.409764  | -1.409614 |

Rotational constants (GHz): 0.6737700 0.2973100 0.2466800

Vibrational harmonic frequencies (cm-1):

|           |           |           |
|-----------|-----------|-----------|
| 40.0914   | 62.5914   | 89.5300   |
| 92.7304   | 149.4088  | 161.9971  |
| 189.6502  | 208.7208  | 224.5272  |
| 227.5486  | 238.7982  | 255.4927  |
| 273.6146  | 288.5563  | 300.1517  |
| 311.0577  | 328.2192  | 343.8228  |
| 350.2267  | 394.4042  | 417.3315  |
| 439.2599  | 456.0711  | 467.5624  |
| 514.4656  | 516.7333  | 540.9494  |
| 563.8148  | 600.0739  | 647.0574  |
| 689.3673  | 727.2836  | 730.5076  |
| 738.7988  | 756.1884  | 817.2301  |
| 832.6482  | 850.1144  | 865.4823  |
| 892.0710  | 900.2231  | 920.9358  |
| 925.6208  | 933.4947  | 935.8620  |
| 952.5092  | 961.7317  | 988.2019  |
| 990.4943  | 999.6019  | 1011.1961 |
| 1019.8354 | 1028.5719 | 1032.4632 |
| 1058.0156 | 1088.9543 | 1092.5303 |
| 1111.2995 | 1136.7878 | 1152.2571 |
| 1164.3242 | 1180.0519 | 1200.2886 |
| 1214.3973 | 1227.7890 | 1240.4927 |
| 1254.6087 | 1260.2945 | 1274.4636 |
| 1280.4587 | 1305.9431 | 1317.9080 |
| 1332.0102 | 1349.7670 | 1359.2230 |
| 1374.2441 | 1384.0936 | 1393.3818 |
| 1398.6545 | 1403.4364 | 1408.3037 |
| 1412.9465 | 1421.9670 | 1450.1008 |
| 1480.4343 | 1484.0943 | 1486.4816 |
| 1489.5971 | 1493.1380 | 1496.6723 |
| 1499.6754 | 1507.8278 | 1508.7599 |
| 1509.9912 | 1512.3993 | 1700.4302 |
| 3004.8570 | 3009.5177 | 3017.6056 |
| 3022.9449 | 3024.4816 | 3028.5845 |
| 3038.4065 | 3046.2797 | 3046.5486 |
| 3051.1655 | 3052.7656 | 3066.6874 |
| 3067.6113 | 3073.7982 | 3079.1278 |
| 3080.9541 | 3085.7286 | 3089.8881 |
| 3095.3438 | 3096.5066 | 3117.1565 |
| 3132.6810 | 3132.8606 | 3212.2751 |

Zero-point correction (Hartree): 0.367439

## POZ-2

-----  
E(RmPW+HF-B95/6-31+G(d,p)) (Hartree): -811.157482794

Electronic state : 1-A

Cartesian coordinates (Angs):

|   |           |           |           |
|---|-----------|-----------|-----------|
| C | -1.693042 | 0.954049  | 0.461101  |
| C | -1.451620 | -0.458351 | -0.138830 |
| C | -3.067239 | 0.938469  | -0.215039 |
| C | -2.997811 | -0.603014 | -0.250901 |
| C | -3.635266 | -1.222613 | 0.984692  |
| C | -3.505142 | -1.286813 | -1.504590 |
| C | -0.702275 | 2.052663  | 0.253655  |

|                                          |           |           |           |
|------------------------------------------|-----------|-----------|-----------|
| C                                        | 0.532132  | 1.982736  | 1.125910  |
| C                                        | 1.826081  | 1.686434  | 0.367545  |
| C                                        | -0.876926 | 3.042164  | -0.622988 |
| C                                        | 1.789169  | 0.435388  | -0.489089 |
| C                                        | 0.715623  | -1.883203 | -0.047145 |
| C                                        | -0.637813 | -1.533482 | 0.573973  |
| C                                        | 2.287734  | -0.894303 | 1.690123  |
| H                                        | -1.830114 | 0.830093  | 1.542061  |
| H                                        | -1.082030 | -0.327497 | -1.162441 |
| H                                        | -3.021571 | 1.343972  | -1.228177 |
| H                                        | -3.899659 | 1.402513  | 0.317273  |
| H                                        | -4.718610 | -1.084687 | 0.954523  |
| H                                        | -3.270339 | -0.773299 | 1.910704  |
| H                                        | -3.443064 | -2.296930 | 1.037529  |
| H                                        | -4.593830 | -1.219367 | -1.576536 |
| H                                        | -3.240047 | -2.348046 | -1.507027 |
| H                                        | -3.079064 | -0.831512 | -2.401149 |
| H                                        | 0.369344  | 1.236339  | 1.906768  |
| H                                        | 0.661578  | 2.934169  | 1.647687  |
| H                                        | 2.668669  | 1.640147  | 1.060662  |
| H                                        | 2.025284  | 2.514981  | -0.315746 |
| H                                        | -0.139093 | 3.828486  | -0.738924 |
| H                                        | -1.757756 | 3.108773  | -1.248508 |
| H                                        | 0.908898  | 0.460597  | -1.134502 |
| H                                        | 1.019311  | -2.872355 | 0.306654  |
| H                                        | 0.606158  | -1.964883 | -1.132462 |
| H                                        | -1.225717 | -2.456195 | 0.557634  |
| H                                        | -0.526020 | -1.285630 | 1.634921  |
| H                                        | 1.564734  | -0.362520 | 2.306295  |
| H                                        | 3.255957  | -0.404417 | 1.790072  |
| H                                        | 2.378225  | -1.911858 | 2.071705  |
| C                                        | 1.891622  | -0.953566 | 0.225682  |
| O                                        | 2.981978  | -1.558296 | -0.491399 |
| O                                        | 3.812344  | -0.452829 | -0.752356 |
| O                                        | 2.895353  | 0.423596  | -1.391697 |
| Rotational constants (GHz):              |           |           |           |
|                                          | 0.6877100 | 0.3040800 | 0.2531400 |
| Vibrational harmonic frequencies (cm-1): |           |           |           |
| 51.0886                                  | 75.0916   | 95.2452   |           |
| 99.0175                                  | 148.1856  | 166.4656  |           |
| 187.9677                                 | 208.8193  | 230.7629  |           |
| 236.8145                                 | 246.9443  | 270.7269  |           |
| 280.6995                                 | 300.1594  | 302.4295  |           |
| 327.1267                                 | 338.0486  | 348.6549  |           |
| 365.2394                                 | 391.3873  | 410.5987  |           |
| 446.5513                                 | 461.4506  | 477.6451  |           |
| 516.0595                                 | 529.5876  | 548.2910  |           |
| 564.1241                                 | 614.3087  | 654.5245  |           |
| 715.3914                                 | 734.8267  | 749.2548  |           |
| 764.0460                                 | 820.9986  | 831.1139  |           |
| 851.2186                                 | 873.0320  | 885.3990  |           |
| 913.3987                                 | 918.6509  | 933.9178  |           |
| 948.2785                                 | 957.2891  | 958.7041  |           |
| 978.1033                                 | 987.1827  | 1009.8159 |           |
| 1017.4741                                | 1026.1770 | 1031.9767 |           |
| 1035.4799                                | 1052.5695 | 1060.6102 |           |
| 1072.8282                                | 1114.4287 | 1120.3815 |           |
| 1143.3031                                | 1160.5038 | 1166.1154 |           |
| 1178.8182                                | 1190.0563 | 1219.2430 |           |
| 1229.5590                                | 1234.8006 | 1256.1323 |           |
| 1261.0743                                | 1266.5304 | 1285.7774 |           |
| 1305.4850                                | 1323.1792 | 1329.0637 |           |

|           |           |           |
|-----------|-----------|-----------|
| 1336.1614 | 1348.3054 | 1364.4703 |
| 1384.2221 | 1395.9874 | 1405.1396 |
| 1408.5178 | 1413.5429 | 1421.2792 |
| 1424.4270 | 1433.4595 | 1459.1414 |
| 1483.4775 | 1485.4291 | 1487.6808 |
| 1490.9735 | 1496.1722 | 1501.3225 |
| 1503.8462 | 1511.1275 | 1513.8168 |
| 1519.2458 | 1529.1008 | 1742.4861 |
| 3048.7027 | 3058.1866 | 3061.7959 |
| 3065.1581 | 3070.2348 | 3074.3721 |
| 3085.0692 | 3091.6959 | 3094.9545 |
| 3100.2376 | 3104.7801 | 3125.3186 |
| 3126.8778 | 3132.6513 | 3134.8351 |
| 3145.2295 | 3146.4617 | 3150.0335 |
| 3150.6480 | 3152.1285 | 3180.5356 |
| 3188.0880 | 3198.1881 | 3275.1238 |

Zero-point correction (Hartree): 0.373225

### POZ-3

-----

E(RB+HF-LYP/6-311G(d,p)) (Hartree): -811.702006790

Electronic state : 1-A

Cartesian coordinates (Angs):

|   |           |           |           |
|---|-----------|-----------|-----------|
| C | -0.001914 | -0.569175 | -0.613977 |
| C | -1.279829 | -0.542823 | 0.317551  |
| C | -0.065222 | -2.120616 | -0.576685 |
| C | -1.516578 | -2.061872 | -0.034465 |
| C | -2.536067 | -2.300888 | -1.155200 |
| C | -1.827727 | -2.960636 | 1.160899  |
| C | 1.400610  | 0.012039  | -0.279787 |
| C | 1.692655  | 1.487324  | -0.656456 |
| C | 1.333060  | 2.599216  | 0.360274  |
| C | -0.034344 | 2.362874  | 0.930628  |
| C | -1.197257 | 2.537274  | 0.296976  |
| C | -2.403896 | 1.780275  | 0.786396  |
| C | -2.473113 | 0.399070  | 0.092332  |
| C | -1.358590 | 3.290187  | -0.998060 |
| H | -0.271601 | -0.200030 | -1.608346 |
| H | -0.972485 | -0.482381 | 1.367479  |
| H | 0.637134  | -2.537234 | 0.148210  |
| H | 0.090783  | -2.636200 | -1.525499 |
| H | -2.484997 | -3.345121 | -1.479047 |
| H | -2.340072 | -1.677426 | -2.031696 |
| H | -3.561573 | -2.107435 | -0.827733 |
| H | -1.826942 | -4.016155 | 0.869212  |
| H | -2.814290 | -2.735193 | 1.581006  |
| H | -1.087806 | -2.835984 | 1.957141  |
| H | 1.175128  | 1.686539  | -1.599176 |
| H | 2.764825  | 1.536350  | -0.867392 |
| H | 1.405898  | 3.561047  | -0.155756 |
| H | 2.076409  | 2.634105  | 1.161338  |
| H | -0.061358 | 1.814969  | 1.871249  |
| H | -3.333511 | 2.325543  | 0.587627  |
| H | -2.342407 | 1.632025  | 1.869406  |
| H | -3.369664 | -0.112548 | 0.462108  |
| H | -2.633770 | 0.538967  | -0.981886 |
| H | -1.693825 | 2.632698  | -1.808174 |
| H | -0.439327 | 3.778403  | -1.322062 |
| H | -2.128062 | 4.062774  | -0.887987 |
| C | 1.944927  | -0.363246 | 1.139711  |
| H | 1.198739  | -0.838465 | 1.775937  |

|                                          |           |           |           |  |
|------------------------------------------|-----------|-----------|-----------|--|
| H                                        | 2.371149  | 0.506289  | 1.643902  |  |
| O                                        | 2.954889  | -1.342193 | 0.909258  |  |
| O                                        | 3.474269  | -0.923431 | -0.373121 |  |
| O                                        | 2.268509  | -0.794323 | -1.138722 |  |
| Rotational constants (GHz):              | 0.4729000 | 0.4306000 | 0.2679900 |  |
| Vibrational harmonic frequencies (cm-1): |           |           |           |  |
| 49.6717                                  | 67.0118   |           | 74.1908   |  |
| 84.8075                                  | 124.7504  |           | 158.5074  |  |
| 159.3900                                 | 202.4858  |           | 205.7186  |  |
| 217.5783                                 | 228.6730  |           | 255.2328  |  |
| 265.2988                                 | 277.2205  |           | 303.2539  |  |
| 314.0231                                 | 328.9515  |           | 360.1061  |  |
| 375.8858                                 | 393.0966  |           | 403.0911  |  |
| 419.7996                                 | 447.9317  |           | 489.8540  |  |
| 511.8749                                 | 523.4431  |           | 554.1080  |  |
| 572.5026                                 | 599.8054  |           | 650.1467  |  |
| 705.1307                                 | 722.3207  |           | 741.0813  |  |
| 780.9365                                 | 805.7038  |           | 811.4873  |  |
| 836.6624                                 | 866.0575  |           | 888.9024  |  |
| 901.7586                                 | 914.1101  |           | 922.5283  |  |
| 926.7511                                 | 949.7008  |           | 951.1028  |  |
| 967.3616                                 | 974.6090  |           | 987.8263  |  |
| 992.9721                                 | 1002.5335 |           | 1011.0733 |  |
| 1013.7220                                | 1036.5232 |           | 1054.7914 |  |
| 1064.1386                                | 1075.0483 |           | 1092.0813 |  |
| 1112.8777                                | 1141.7526 |           | 1156.3128 |  |
| 1169.0863                                | 1188.0676 |           | 1208.1634 |  |
| 1221.8029                                | 1229.3562 |           | 1242.3346 |  |
| 1254.1500                                | 1261.2750 |           | 1270.5341 |  |
| 1281.5765                                | 1302.0214 |           | 1308.6501 |  |
| 1325.8645                                | 1346.3073 |           | 1357.3322 |  |
| 1364.5427                                | 1366.9006 |           | 1380.8913 |  |
| 1387.6060                                | 1400.9896 |           | 1403.4642 |  |
| 1419.7388                                | 1420.7570 |           | 1478.1413 |  |
| 1480.5648                                | 1485.6759 |           | 1488.0582 |  |
| 1489.3792                                | 1493.0406 |           | 1496.8645 |  |
| 1497.8500                                | 1507.2688 |           | 1509.5447 |  |
| 1511.2264                                | 1516.0502 |           | 1733.0645 |  |
| 3009.0026                                | 3009.6654 |           | 3013.9729 |  |
| 3019.4458                                | 3021.7624 |           | 3024.5324 |  |
| 3035.2980                                | 3038.8877 |           | 3041.2771 |  |
| 3045.6849                                | 3054.1225 |           | 3058.7759 |  |
| 3059.9078                                | 3063.0955 |           | 3064.8780 |  |
| 3067.9705                                | 3077.5561 |           | 3080.9029 |  |
| 3084.2171                                | 3090.0293 |           | 3105.8019 |  |
| 3109.7070                                | 3115.1873 |           | 3127.0921 |  |
| Zero-point correction (Hartree):         | 0.367339  |           |           |  |

**POZ-3**

-----  
E(RmPW+HF-B95/6-31+G(d,p)) (Hartree): -811.150854279

Electronic state : 1-A

Cartesian coordinates (Angs):

|   |           |           |           |
|---|-----------|-----------|-----------|
| C | -0.153593 | -0.519655 | -0.616665 |
| C | -1.360645 | -0.217054 | 0.329111  |
| C | -0.555141 | -2.005096 | -0.561719 |
| C | -1.943941 | -1.615299 | -0.035683 |
| C | -2.957797 | -1.573824 | -1.171369 |
| C | -2.484840 | -2.418431 | 1.130222  |
| C | 1.335855  | -0.295683 | -0.288969 |
| C | 1.981800  | 1.043665  | -0.678996 |



|                                                       |           |           |           |
|-------------------------------------------------------|-----------|-----------|-----------|
| C                                                     | 1.928794  | 2.184067  | 0.345939  |
| C                                                     | 0.562645  | 2.270436  | 0.943032  |
| C                                                     | -0.532995 | 2.670428  | 0.292429  |
| C                                                     | -1.874118 | 2.269578  | 0.818434  |
| C                                                     | -2.305666 | 0.963327  | 0.142655  |
| C                                                     | -0.511228 | 3.305255  | -1.064343 |
| H                                                     | -0.348325 | -0.092309 | -1.606234 |
| H                                                     | -1.025156 | -0.241346 | 1.373416  |
| H                                                     | 0.037121  | -2.540105 | 0.185537  |
| H                                                     | -0.507010 | -2.569081 | -1.493696 |
| H                                                     | -3.164438 | -2.590080 | -1.515217 |
| H                                                     | -2.585962 | -1.007195 | -2.028582 |
| H                                                     | -3.905866 | -1.129370 | -0.860005 |
| H                                                     | -2.747662 | -3.433101 | 0.820111  |
| H                                                     | -3.385152 | -1.955324 | 1.544692  |
| H                                                     | -1.746263 | -2.494926 | 1.931860  |
| H                                                     | 1.506942  | 1.368791  | -1.608270 |
| H                                                     | 3.024896  | 0.818992  | -0.916430 |
| H                                                     | 2.212115  | 3.111253  | -0.158929 |
| H                                                     | 2.677345  | 2.031803  | 1.125645  |
| H                                                     | 0.422673  | 1.801023  | 1.915443  |
| H                                                     | -2.630003 | 3.040023  | 0.639522  |
| H                                                     | -1.817963 | 2.109071  | 1.898763  |
| H                                                     | -3.279715 | 0.670898  | 0.550060  |
| H                                                     | -2.470386 | 1.135800  | -0.925628 |
| H                                                     | -0.810846 | 2.591271  | -1.839238 |
| H                                                     | 0.472813  | 3.686916  | -1.333526 |
| H                                                     | -1.220728 | 4.135112  | -1.110496 |
| C                                                     | 1.747268  | -0.767102 | 1.131184  |
| H                                                     | 0.899748  | -1.062986 | 1.749389  |
| H                                                     | 2.341096  | -0.011708 | 1.647659  |
| O                                                     | 2.512803  | -1.936078 | 0.915391  |
| O                                                     | 3.109245  | -1.655498 | -0.343863 |
| O                                                     | 1.976995  | -1.301061 | -1.106205 |
| Rotational constants (GHz):                           |           |           |           |
|                                                       | 0.4894800 | 0.4437100 | 0.2789500 |
| Vibrational harmonic frequencies (cm <sup>-1</sup> ): |           |           |           |
| 59.9188                                               | 86.2945   | 98.5839   |           |
| 107.0408                                              | 139.0108  | 160.0403  |           |
| 196.5364                                              | 210.5302  | 221.9273  |           |
| 225.9476                                              | 240.8515  | 264.5720  |           |
| 275.3542                                              | 294.9888  | 314.3186  |           |
| 323.7801                                              | 344.5892  | 362.1297  |           |
| 389.9687                                              | 398.2016  | 404.8229  |           |
| 425.1336                                              | 451.8529  | 495.1736  |           |
| 529.0615                                              | 529.5431  | 562.4366  |           |
| 576.2107                                              | 611.0772  | 668.2410  |           |
| 735.1360                                              | 754.9382  | 789.2798  |           |
| 815.9425                                              | 818.9513  | 829.0557  |           |
| 856.5836                                              | 877.6325  | 899.1428  |           |
| 920.2465                                              | 935.5102  | 948.3664  |           |
| 959.8226                                              | 971.1308  | 981.4224  |           |
| 991.3966                                              | 993.2143  | 1008.5560 |           |
| 1017.1307                                             | 1021.1627 | 1027.1136 |           |
| 1048.6905                                             | 1059.8186 | 1061.4474 |           |
| 1091.0267                                             | 1101.0053 | 1127.8073 |           |
| 1135.3618                                             | 1147.3983 | 1158.8363 |           |
| 1185.3383                                             | 1204.8519 | 1227.5005 |           |
| 1233.2622                                             | 1239.8112 | 1249.4773 |           |
| 1256.0399                                             | 1265.0745 | 1280.8505 |           |
| 1303.1005                                             | 1315.1124 | 1325.3270 |           |
| 1336.3461                                             | 1351.4258 | 1360.2579 |           |

|           |           |           |
|-----------|-----------|-----------|
| 1369.0025 | 1374.8527 | 1385.1131 |
| 1393.4256 | 1407.1935 | 1414.0091 |
| 1424.1632 | 1431.3088 | 1474.7900 |
| 1483.6150 | 1488.4531 | 1490.4975 |
| 1493.1182 | 1497.0061 | 1498.7106 |
| 1504.8299 | 1514.1547 | 1516.0398 |
| 1519.7590 | 1527.6257 | 1773.5012 |
| 3053.5772 | 3055.0518 | 3056.3720 |
| 3058.2272 | 3066.4689 | 3070.1286 |
| 3079.3880 | 3083.4413 | 3090.7235 |
| 3096.5485 | 3104.7916 | 3110.8099 |
| 3120.5739 | 3124.0578 | 3126.8879 |
| 3132.7058 | 3141.3334 | 3143.1517 |
| 3145.3118 | 3148.5536 | 3157.0273 |
| 3167.8204 | 3172.8291 | 3175.7012 |

Zero-point correction (Hartree): 0.373273

#### POZ-4

-----  
E(RB+HF-LYP/6-311G(d,p)) (Hartree): -811.699665973

Electronic state : 1-A

Cartesian coordinates (Angs):

|   |           |           |           |
|---|-----------|-----------|-----------|
| C | -0.208311 | 0.497530  | -0.607661 |
| C | 0.945711  | 0.982284  | 0.361280  |
| C | -0.738226 | 1.957699  | -0.641535 |
| C | 0.589605  | 2.471235  | -0.025372 |
| C | 1.496324  | 3.089980  | -1.096837 |
| C | 0.451844  | 3.425776  | 1.159976  |
| C | -1.293096 | -0.578077 | -0.306045 |
| C | -0.984360 | -2.036159 | -0.745010 |
| C | -0.223697 | -2.945318 | 0.252667  |
| C | 0.922464  | -2.205600 | 0.876917  |
| C | 2.082393  | -1.893352 | 0.293103  |
| C | 2.873499  | -0.737893 | 0.849410  |
| C | 2.418447  | 0.580375  | 0.179710  |
| C | 2.570951  | -2.479086 | -1.006146 |
| H | 0.226008  | 0.239187  | -1.578209 |
| H | 0.656485  | 0.819845  | 1.405749  |
| H | -1.591834 | 2.109548  | 0.020047  |
| H | -1.007138 | 2.345050  | -1.625863 |
| H | 1.060863  | 4.033238  | -1.441476 |
| H | 1.603871  | 2.441819  | -1.970894 |
| H | 2.497497  | 3.309492  | -0.714849 |
| H | 0.048580  | 4.392625  | 0.840376  |
| H | 1.421933  | 3.612592  | 1.634273  |
| H | -0.221100 | 3.021671  | 1.922198  |
| H | -0.421856 | -1.985383 | -1.681826 |
| H | -1.947001 | -2.495362 | -0.981164 |
| H | 0.105281  | -3.836749 | -0.288892 |
| H | -0.909784 | -3.303390 | 1.025912  |
| H | 0.703818  | -1.716549 | 1.824541  |
| H | 3.949394  | -0.866454 | 0.685080  |
| H | 2.719416  | -0.661260 | 1.930593  |
| H | 3.031139  | 1.390286  | 0.593477  |
| H | 2.657092  | 0.545256  | -0.888621 |
| H | 2.620922  | -1.721435 | -1.796610 |
| H | 1.943216  | -3.295187 | -1.365505 |
| H | 3.588376  | -2.867204 | -0.883182 |
| C | -1.914723 | -0.479952 | 1.120189  |
| H | -1.599908 | 0.431415  | 1.633990  |
| H | -1.716324 | -1.350719 | 1.741284  |

|   |           |           |           |
|---|-----------|-----------|-----------|
| O | -3.320025 | -0.465040 | 0.900719  |
| O | -3.403605 | 0.383029  | -0.253604 |
| O | -2.445356 | -0.229111 | -1.150652 |

Rotational constants (GHz): 0.4712000 0.4347000 0.2688900

Vibrational harmonic frequencies (cm-1):

|           |           |           |
|-----------|-----------|-----------|
| 47.7155   | 60.5682   | 74.7303   |
| 84.9456   | 116.5585  | 159.6127  |
| 168.9789  | 192.1509  | 203.7933  |
| 215.6777  | 230.7148  | 254.8414  |
| 267.5379  | 270.2415  | 294.1488  |
| 316.8960  | 320.5279  | 356.8145  |
| 383.1637  | 397.9468  | 406.3408  |
| 413.6265  | 438.6656  | 479.1037  |
| 495.9757  | 527.4507  | 553.1757  |
| 576.6917  | 600.0341  | 651.5640  |
| 709.5067  | 722.5586  | 745.0610  |
| 775.3470  | 795.5586  | 816.2481  |
| 840.2891  | 869.5872  | 878.7002  |
| 896.4129  | 907.5026  | 918.2261  |
| 925.2252  | 950.5971  | 961.6762  |
| 966.3355  | 978.0010  | 986.1029  |
| 1000.8119 | 1007.7154 | 1012.6559 |
| 1016.4744 | 1037.9656 | 1051.3995 |
| 1063.0813 | 1074.6204 | 1090.7106 |
| 1116.7364 | 1138.7587 | 1157.5523 |
| 1175.2404 | 1185.0536 | 1206.5553 |
| 1225.1170 | 1232.0802 | 1250.4388 |
| 1255.3706 | 1264.0949 | 1270.2536 |
| 1279.1909 | 1284.2847 | 1311.9474 |
| 1328.8186 | 1345.1177 | 1355.4395 |
| 1364.3717 | 1367.5309 | 1381.3082 |
| 1389.5435 | 1402.6692 | 1404.7427 |
| 1421.7577 | 1424.6283 | 1479.5504 |
| 1483.0706 | 1484.9444 | 1488.0339 |
| 1489.8096 | 1494.4000 | 1495.5100 |
| 1498.6029 | 1504.8967 | 1508.7743 |
| 1510.4312 | 1515.7640 | 1735.9353 |
| 3007.8776 | 3009.2335 | 3013.3392 |
| 3017.5667 | 3020.1570 | 3023.0167 |
| 3034.3774 | 3038.0008 | 3043.3286 |
| 3046.0293 | 3054.1551 | 3055.4285 |
| 3062.1785 | 3063.4287 | 3063.8300 |
| 3066.9467 | 3076.2178 | 3079.3244 |
| 3088.0576 | 3088.9199 | 3110.4363 |
| 3113.3764 | 3116.2036 | 3147.7040 |

Zero-point correction (Hartree): 0.367300

**POZ-4**

-----

E(RmPW+HF-B95/6-31+G(d,p)) (Hartree): -811.148305986

Electronic state : 1-A

Cartesian coordinates (Angs):

|   |           |           |           |
|---|-----------|-----------|-----------|
| C | -0.129017 | -0.505002 | -0.606472 |
| C | -1.322936 | -0.252704 | 0.372063  |
| C | -0.510239 | -1.996593 | -0.607846 |
| C | -1.889232 | -1.649868 | -0.026670 |
| C | -2.939828 | -1.594845 | -1.127626 |
| C | -2.376296 | -2.503178 | 1.127677  |
| C | 1.364966  | -0.247080 | -0.315360 |
| C | 1.944269  | 1.105922  | -0.771379 |
| C | 1.896949  | 2.255075  | 0.243669  |

|                                          |           |           |           |
|------------------------------------------|-----------|-----------|-----------|
| C                                        | 0.553806  | 2.313116  | 0.894621  |
| C                                        | -0.580112 | 2.668819  | 0.286205  |
| C                                        | -1.880571 | 2.230598  | 0.879408  |
| C                                        | -2.302478 | 0.906986  | 0.232610  |
| C                                        | -0.638343 | 3.286097  | -1.077364 |
| H                                        | -0.356010 | -0.051921 | -1.577398 |
| H                                        | -0.970159 | -0.300759 | 1.410164  |
| H                                        | 0.096484  | -2.569145 | 0.095390  |
| H                                        | -0.484340 | -2.509554 | -1.570071 |
| H                                        | -3.137158 | -2.604901 | -1.494533 |
| H                                        | -2.606036 | -0.996939 | -1.979280 |
| H                                        | -3.886091 | -1.179091 | -0.774064 |
| H                                        | -2.626399 | -3.513083 | 0.792444  |
| H                                        | -3.273344 | -2.073459 | 1.583187  |
| H                                        | -1.612712 | -2.588135 | 1.904779  |
| H                                        | 1.409000  | 1.402683  | -1.677099 |
| H                                        | 2.979377  | 0.920607  | -1.063285 |
| H                                        | 2.137012  | 3.184279  | -0.279618 |
| H                                        | 2.681146  | 2.127321  | 0.992919  |
| H                                        | 0.463411  | 1.861465  | 1.880669  |
| H                                        | -2.669272 | 2.974411  | 0.731440  |
| H                                        | -1.766931 | 2.082094  | 1.956902  |
| H                                        | -3.248419 | 0.590090  | 0.685874  |
| H                                        | -2.522603 | 1.070985  | -0.826889 |
| H                                        | -0.955403 | 2.555914  | -1.829723 |
| H                                        | 0.322118  | 3.689590  | -1.395932 |
| H                                        | -1.370729 | 4.096872  | -1.098842 |
| C                                        | 1.796509  | -0.663232 | 1.108088  |
| H                                        | 1.013415  | -1.236452 | 1.610555  |
| H                                        | 2.114401  | 0.166956  | 1.733277  |
| O                                        | 2.933807  | -1.471490 | 0.900672  |
| O                                        | 2.505370  | -2.225536 | -0.214285 |
| O                                        | 2.103893  | -1.206035 | -1.121464 |
| Rotational constants (GHz):              |           |           |           |
|                                          | 0.4841800 | 0.4507000 | 0.2799500 |
| Vibrational harmonic frequencies (cm-1): |           |           |           |
| 46.9159                                  | 71.5923   | 93.7625   |           |
| 98.8517                                  | 134.2435  | 159.8339  |           |
| 193.9550                                 | 201.2864  | 218.9526  |           |
| 228.1516                                 | 232.4709  | 264.9939  |           |
| 280.6813                                 | 292.3575  | 308.9339  |           |
| 324.1894                                 | 347.7413  | 357.9116  |           |
| 394.0404                                 | 402.9265  | 409.7088  |           |
| 423.3774                                 | 450.1078  | 483.8848  |           |
| 502.2340                                 | 537.6902  | 556.7285  |           |
| 574.8674                                 | 612.2282  | 667.2272  |           |
| 727.6353                                 | 765.5278  | 789.3026  |           |
| 809.3054                                 | 819.7912  | 828.3426  |           |
| 858.1830                                 | 880.6212  | 894.9523  |           |
| 918.2925                                 | 926.9981  | 936.9314  |           |
| 958.8372                                 | 971.8390  | 977.9929  |           |
| 989.6331                                 | 1000.4793 | 1007.9502 |           |
| 1018.3863                                | 1023.2736 | 1038.5567 |           |
| 1049.8465                                | 1057.7585 | 1058.9404 |           |
| 1081.9858                                | 1099.8665 | 1127.6486 |           |
| 1137.4888                                | 1145.4330 | 1158.6628 |           |
| 1185.3058                                | 1204.3048 | 1229.3224 |           |
| 1233.7234                                | 1236.9095 | 1254.7301 |           |
| 1258.4474                                | 1261.1331 | 1277.5118 |           |
| 1296.1795                                | 1305.3761 | 1326.8233 |           |
| 1335.4724                                | 1357.6334 | 1361.5787 |           |
| 1366.1513                                | 1374.3781 | 1393.0389 |           |

|           |           |           |
|-----------|-----------|-----------|
| 1397.7474 | 1408.6994 | 1413.8333 |
| 1423.8401 | 1435.3232 | 1476.4020 |
| 1484.8423 | 1488.2743 | 1489.2451 |
| 1491.9331 | 1497.0049 | 1499.9364 |
| 1511.8810 | 1512.0772 | 1515.3717 |
| 1518.4492 | 1532.1459 | 1775.7136 |
| 3050.0730 | 3054.9812 | 3055.9954 |
| 3057.6373 | 3065.7479 | 3069.5402 |
| 3078.2159 | 3087.5196 | 3092.4019 |
| 3093.1512 | 3105.0298 | 3108.3108 |
| 3120.8864 | 3123.8707 | 3126.9234 |
| 3133.2259 | 3140.2914 | 3144.1529 |
| 3148.5161 | 3148.9572 | 3164.6357 |
| 3165.4432 | 3175.0516 | 3198.3329 |

Zero-point correction (Hartree): 0.373100

### CI-1a

-----  
E(RB+HF-LYP/6-311G(d,p)) (Hartree): -811.753966943

Electronic state : 1-A

Cartesian coordinates (Angs):

|   |           |           |           |
|---|-----------|-----------|-----------|
| C | -1.518477 | 0.415702  | -0.077246 |
| C | -0.317300 | 1.341308  | 0.261877  |
| C | -2.407490 | 1.695059  | -0.215309 |
| C | -1.112116 | 2.553814  | -0.352494 |
| C | -0.775675 | 2.839138  | -1.820104 |
| C | -1.069691 | 3.843387  | 0.463493  |
| C | -1.987910 | -0.682852 | 0.843296  |
| C | -2.927840 | -1.703438 | 0.227149  |
| C | -2.240574 | -2.639503 | -0.801187 |
| C | -1.643900 | -0.773146 | 2.129779  |
| C | -1.128235 | -3.444556 | -0.175815 |
| C | 1.655565  | -0.259364 | 0.460651  |
| C | 1.067623  | 0.979081  | -0.264770 |
| C | 3.211862  | -1.794041 | -0.977358 |
| H | -1.357218 | -0.003187 | -1.076597 |
| H | -0.257615 | 1.497173  | 1.343813  |
| H | -2.938691 | 1.904381  | 0.716600  |
| H | -3.117072 | 1.728515  | -1.046208 |
| H | -1.485632 | 3.563147  | -2.232571 |
| H | -0.826351 | 1.940249  | -2.441000 |
| H | 0.228053  | 3.261488  | -1.923811 |
| H | -1.773119 | 4.583614  | 0.067054  |
| H | -0.069880 | 4.289366  | 0.441035  |
| H | -1.331152 | 3.659210  | 1.509513  |
| H | -3.750732 | -1.192881 | -0.285826 |
| H | -3.379875 | -2.308851 | 1.018619  |
| H | -1.828714 | -2.082557 | -1.644995 |
| H | -2.990133 | -3.340960 | -1.188644 |
| H | -2.036531 | -1.561511 | 2.763652  |
| H | -0.966573 | -0.071472 | 2.600928  |
| H | -1.445546 | -4.133622 | 0.638426  |
| H | 1.808266  | 0.006025  | 1.512554  |
| H | 0.983593  | -1.113661 | 0.375453  |
| H | 1.762313  | 1.809545  | -0.118330 |
| H | 1.013375  | 0.774979  | -1.339659 |
| H | 2.863364  | -2.713936 | -0.497345 |
| H | 4.265603  | -1.880717 | -1.240940 |
| H | 2.613402  | -1.682621 | -1.888425 |
| C | 2.985198  | -0.632009 | -0.076020 |
| O | 4.012638  | 0.052657  | 0.218777  |

|                                          |           |           |           |
|------------------------------------------|-----------|-----------|-----------|
| O                                        | 3.861806  | 1.149184  | 1.046854  |
| O                                        | 0.034383  | -3.372241 | -0.493001 |
| Rotational constants (GHz):              | 0.3894000 | 0.3398100 | 0.2128900 |
| Vibrational harmonic frequencies (cm-1): |           |           |           |
| 15.7656                                  | 31.3529   | 43.3190   |           |
| 49.3355                                  | 61.5925   | 73.2592   |           |
| 76.6501                                  | 106.9057  | 119.1595  |           |
| 135.3457                                 | 159.4296  | 173.1435  |           |
| 201.0960                                 | 212.4870  | 234.9456  |           |
| 241.6571                                 | 271.8048  | 278.1704  |           |
| 295.6209                                 | 319.6232  | 339.4930  |           |
| 347.8885                                 | 376.3049  | 377.6482  |           |
| 390.2928                                 | 457.8409  | 484.6173  |           |
| 497.5492                                 | 504.7623  | 558.4607  |           |
| 584.0231                                 | 617.3378  | 648.9459  |           |
| 721.6203                                 | 740.9614  | 778.7494  |           |
| 794.0281                                 | 814.1398  | 863.7356  |           |
| 877.7835                                 | 883.2604  | 893.9584  |           |
| 916.7295                                 | 923.8671  | 932.2066  |           |
| 950.3115                                 | 956.2583  | 978.6905  |           |
| 994.7559                                 | 1001.2429 | 1010.5403 |           |
| 1019.5832                                | 1033.5043 | 1042.8345 |           |
| 1045.3028                                | 1056.9705 | 1078.3142 |           |
| 1113.8096                                | 1124.6120 | 1179.1059 |           |
| 1187.6236                                | 1204.9246 | 1209.3298 |           |
| 1220.6056                                | 1224.5191 | 1253.1074 |           |
| 1260.6122                                | 1268.3860 | 1284.9177 |           |
| 1301.3001                                | 1326.6453 | 1337.0977 |           |
| 1340.8102                                | 1354.9749 | 1373.7353 |           |
| 1380.7754                                | 1401.0667 | 1413.4110 |           |
| 1416.6669                                | 1419.8355 | 1422.3363 |           |
| 1451.4948                                | 1454.0431 | 1461.2203 |           |
| 1467.4689                                | 1470.7379 | 1484.5686 |           |
| 1486.0840                                | 1489.3582 | 1495.6203 |           |
| 1501.1394                                | 1507.6953 | 1507.9555 |           |
| 1553.6898                                | 1701.1865 | 1802.2248 |           |
| 2868.2509                                | 3010.8806 | 3016.8273 |           |
| 3017.3917                                | 3021.2570 | 3023.1422 |           |
| 3024.7747                                | 3026.8106 | 3034.4201 |           |
| 3038.6957                                | 3044.0711 | 3062.3723 |           |
| 3071.1366                                | 3072.6095 | 3079.4724 |           |
| 3080.0465                                | 3083.5414 | 3087.8456 |           |
| 3092.7571                                | 3098.5785 | 3124.0683 |           |
| 3135.4919                                | 3136.5307 | 3215.8306 |           |

Zero-point correction (Hartree): 0.362039

### CI-2a

-----  
E(RB+HF-LYP/6-311G(d,p)) (Hartree): -811.742362370

Electronic state : 1-A

Cartesian coordinates (Angs):

|   |           |           |           |
|---|-----------|-----------|-----------|
| C | 0.989561  | -0.732129 | 0.556775  |
| C | 1.826391  | -0.166414 | -0.633758 |
| C | 2.099867  | -1.814644 | 0.748204  |
| C | 3.081305  | -0.958141 | -0.106173 |
| C | 4.020132  | -0.130554 | 0.778569  |
| C | 3.880341  | -1.708393 | -1.170184 |
| C | -0.440002 | -1.193742 | 0.352877  |
| C | -1.366521 | -0.907648 | 1.516403  |
| C | -2.860534 | -1.202815 | 1.307483  |
| C | -0.828194 | -1.838379 | -0.749686 |

|                                          |           |           |           |
|------------------------------------------|-----------|-----------|-----------|
| C                                        | -3.473430 | -0.357798 | 0.245216  |
| C                                        | 0.577456  | 2.032288  | -1.207892 |
| C                                        | 1.928267  | 1.336008  | -0.894625 |
| C                                        | 0.504229  | 3.593930  | 0.870698  |
| H                                        | 1.021495  | -0.030288 | 1.396456  |
| H                                        | 1.487295  | -0.650195 | -1.554973 |
| H                                        | 1.826039  | -2.745666 | 0.247417  |
| H                                        | 2.403227  | -2.039844 | 1.773856  |
| H                                        | 4.748424  | -0.787610 | 1.264146  |
| H                                        | 3.484198  | 0.402528  | 1.569146  |
| H                                        | 4.579281  | 0.607550  | 0.195246  |
| H                                        | 4.619179  | -2.373388 | -0.710462 |
| H                                        | 4.422217  | -1.014536 | -1.822220 |
| H                                        | 3.227342  | -2.319462 | -1.799937 |
| H                                        | -1.259108 | 0.148114  | 1.785730  |
| H                                        | -1.020008 | -1.474865 | 2.389876  |
| H                                        | -3.379397 | -0.988199 | 2.252679  |
| H                                        | -3.049380 | -2.255598 | 1.082345  |
| H                                        | -1.839066 | -2.194791 | -0.896852 |
| H                                        | -0.140504 | -2.038930 | -1.563569 |
| H                                        | -3.223049 | 0.689546  | 0.088834  |
| H                                        | 0.774120  | 2.910896  | -1.833663 |
| H                                        | -0.087650 | 1.369007  | -1.763270 |
| H                                        | 2.596882  | 1.483517  | -1.749538 |
| H                                        | 2.412187  | 1.837839  | -0.051701 |
| H                                        | 1.187590  | 3.114016  | 1.578907  |
| H                                        | -0.253707 | 4.129411  | 1.441652  |
| H                                        | 1.093341  | 4.292175  | 0.272032  |
| C                                        | -0.171651 | 2.530882  | 0.018148  |
| O                                        | -1.270180 | 2.111423  | 0.320026  |
| O                                        | -4.927050 | -0.105050 | -1.476553 |
| O                                        | -4.332049 | -0.877115 | -0.516531 |
| Rotational constants (GHz):              | 0.5645800 | 0.2487900 | 0.2040000 |
| Vibrational harmonic frequencies (cm-1): |           |           |           |
| 18.8147                                  | 29.3899   |           | 33.8864   |
| 51.2236                                  | 56.2775   |           | 68.6513   |
| 77.3610                                  | 99.7308   |           | 108.6326  |
| 119.8182                                 | 150.0736  |           | 187.1273  |
| 214.7955                                 | 216.1077  |           | 230.5191  |
| 247.6210                                 | 264.2120  |           | 286.8694  |
| 290.6515                                 | 308.0789  |           | 333.2896  |
| 356.2965                                 | 372.0329  |           | 405.7607  |
| 438.7427                                 | 456.9028  |           | 484.3040  |
| 512.3410                                 | 526.1055  |           | 540.8158  |
| 567.7819                                 | 590.8618  |           | 609.1256  |
| 709.6354                                 | 735.4906  |           | 758.3107  |
| 792.4556                                 | 815.5631  |           | 868.7306  |
| 879.6398                                 | 885.7331  |           | 893.9366  |
| 906.6397                                 | 924.9533  |           | 933.9855  |
| 939.7079                                 | 951.9739  |           | 971.7422  |
| 986.2569                                 | 992.1734  |           | 993.4338  |
| 1015.9131                                | 1025.1652 |           | 1045.5463 |
| 1046.8511                                | 1051.1524 |           | 1108.4986 |
| 1115.6015                                | 1124.5597 |           | 1162.1747 |
| 1179.0208                                | 1202.4364 |           | 1209.0608 |
| 1222.5237                                | 1227.4177 |           | 1239.8840 |
| 1253.3504                                | 1258.6967 |           | 1274.4059 |
| 1282.0287                                | 1312.1266 |           | 1325.4166 |
| 1346.7080                                | 1356.7322 |           | 1373.7542 |
| 1378.9843                                | 1385.2535 |           | 1398.8292 |
| 1401.0563                                | 1412.5566 |           | 1419.4109 |

|           |           |           |
|-----------|-----------|-----------|
| 1454.7590 | 1467.1766 | 1469.7386 |
| 1471.6993 | 1477.8558 | 1483.6041 |
| 1487.3381 | 1488.0618 | 1496.5004 |
| 1500.2077 | 1508.8415 | 1511.0071 |
| 1552.0572 | 1702.9618 | 1775.0346 |
| 2992.3478 | 3010.2550 | 3012.3802 |
| 3017.9146 | 3019.3061 | 3027.8763 |
| 3030.5411 | 3036.1492 | 3040.6418 |
| 3043.9188 | 3052.2147 | 3066.5352 |
| 3069.6096 | 3079.0082 | 3079.6776 |
| 3080.6704 | 3083.6024 | 3095.4366 |
| 3097.0674 | 3102.3459 | 3138.1505 |
| 3149.3138 | 3159.7668 | 3225.9551 |

Zero-point correction (Hartree): 0.362017

### CI-1b

-----  
E(RB+HF-LYP/6-311G(d,p)) (Hartree): -811.753484593

Electronic state : 1-A

Cartesian coordinates (Angs):

|   |           |           |           |
|---|-----------|-----------|-----------|
| C | -0.795085 | -0.726178 | -0.451661 |
| C | -1.801603 | -0.141158 | 0.584520  |
| C | -1.876947 | -1.792198 | -0.825926 |
| C | -2.967903 | -0.926977 | -0.126175 |
| C | -3.761393 | -0.098011 | -1.142459 |
| C | -3.918329 | -1.671173 | 0.809702  |
| C | 0.573429  | -1.232551 | -0.043549 |
| C | 1.598309  | -1.196403 | -1.159229 |
| C | 2.984311  | -1.777175 | -0.848442 |
| C | 0.831499  | -1.713073 | 1.174785  |
| C | 3.797548  | -0.944307 | 0.125573  |
| C | -0.655509 | 2.068897  | 1.330111  |
| C | -1.933002 | 1.367466  | 0.791501  |
| C | 0.083893  | 3.361455  | -0.838033 |
| H | -0.678298 | -0.026566 | -1.287221 |
| H | -1.626351 | -0.606569 | 1.559050  |
| H | -1.695226 | -2.731567 | -0.299348 |
| H | -2.022121 | -2.002770 | -1.888306 |
| H | -4.412947 | -0.754565 | -1.727218 |
| H | -3.111064 | 0.426146  | -1.848671 |
| H | -4.397581 | 0.645881  | -0.652454 |
| H | -4.586737 | -2.331398 | 0.246916  |
| H | -4.544646 | -0.973470 | 1.376568  |
| H | -3.367743 | -2.287360 | 1.526064  |
| H | 1.723120  | -0.152054 | -1.473179 |
| H | 1.178115  | -1.720494 | -2.027662 |
| H | 3.560230  | -1.787750 | -1.784211 |
| H | 2.940312  | -2.806598 | -0.483795 |
| H | 1.801607  | -2.105610 | 1.449606  |
| H | 0.078346  | -1.732431 | 1.954478  |
| H | 3.766100  | 0.149039  | -0.058150 |
| H | -0.952587 | 3.011820  | 1.805562  |
| H | -0.161073 | 1.454177  | 2.084296  |
| H | -2.737057 | 1.549157  | 1.512616  |
| H | -2.245467 | 1.856439  | -0.136027 |
| H | 0.173739  | 2.840981  | -1.797705 |
| H | 0.899989  | 4.092261  | -0.846113 |
| H | -0.887382 | 3.845037  | -0.747284 |
| C | 0.332562  | 2.408455  | 0.264147  |
| O | 1.459684  | 1.835095  | 0.339049  |
| O | 2.384712  | 2.108571  | -0.657129 |



|                                          |           |           |           |  |
|------------------------------------------|-----------|-----------|-----------|--|
| O                                        | 4.449859  | -1.415434 | 1.027203  |  |
| Rotational constants (GHz):              | 0.5372700 | 0.2926800 | 0.2214800 |  |
| Vibrational harmonic frequencies (cm-1): |           |           |           |  |
| 27.9819                                  | 35.9656   |           | 44.7375   |  |
| 52.4764                                  | 70.3033   |           | 84.9733   |  |
| 96.7602                                  | 111.2317  |           | 141.5473  |  |
| 161.0482                                 | 172.5486  |           | 193.8448  |  |
| 208.8839                                 | 222.4943  |           | 245.4140  |  |
| 257.1919                                 | 265.6761  |           | 285.4989  |  |
| 298.7123                                 | 319.9860  |           | 348.6069  |  |
| 358.1891                                 | 361.7035  |           | 387.6181  |  |
| 403.4496                                 | 449.8785  |           | 481.5733  |  |
| 507.7494                                 | 519.4745  |           | 541.8454  |  |
| 566.2985                                 | 602.6706  |           | 618.5889  |  |
| 717.5629                                 | 738.4314  |           | 770.9846  |  |
| 781.2610                                 | 811.5586  |           | 864.6990  |  |
| 879.7175                                 | 882.5016  |           | 894.6054  |  |
| 903.5603                                 | 910.4071  |           | 927.5460  |  |
| 943.0773                                 | 952.1547  |           | 982.9803  |  |
| 992.2933                                 | 1008.4348 |           | 1014.5761 |  |
| 1029.3471                                | 1034.6054 |           | 1044.0164 |  |
| 1048.8451                                | 1065.3322 |           | 1089.6658 |  |
| 1107.4878                                | 1118.7379 |           | 1167.9547 |  |
| 1186.0512                                | 1207.5957 |           | 1211.1860 |  |
| 1220.5617                                | 1228.6520 |           | 1243.9513 |  |
| 1256.6479                                | 1264.8548 |           | 1279.8627 |  |
| 1295.6202                                | 1311.6009 |           | 1340.6489 |  |
| 1349.0652                                | 1362.7977 |           | 1377.5607 |  |
| 1394.7685                                | 1399.3260 |           | 1403.3956 |  |
| 1412.2907                                | 1422.1567 |           | 1430.4795 |  |
| 1435.3691                                | 1451.4656 |           | 1467.6599 |  |
| 1471.8880                                | 1475.7308 |           | 1479.0587 |  |
| 1485.4221                                | 1485.9689 |           | 1495.4912 |  |
| 1499.5116                                | 1507.6178 |           | 1510.0901 |  |
| 1548.2920                                | 1702.0388 |           | 1795.9801 |  |
| 2922.0764                                | 2996.4032 |           | 3008.3831 |  |
| 3010.1096                                | 3015.0686 |           | 3015.2987 |  |
| 3018.8635                                | 3026.7719 |           | 3027.9797 |  |
| 3030.7198                                | 3040.2017 |           | 3045.7117 |  |
| 3066.3226                                | 3067.6024 |           | 3068.8872 |  |
| 3078.3793                                | 3080.8944 |           | 3081.1292 |  |
| 3083.0806                                | 3099.5044 |           | 3102.8413 |  |
| 3143.8151                                | 3144.3098 |           | 3225.4114 |  |

Zero-point correction (Hartree): 0.362087

**CI-2b**

-----  
E(RB+HF-LYP/6-311G(d,p)) (Hartree): -811.749461400

Electronic state : 1-A

Cartesian coordinates (Angs):

|   |           |           |           |
|---|-----------|-----------|-----------|
| C | -0.702590 | -0.763814 | -0.241332 |
| C | -1.901360 | -0.202783 | 0.578231  |
| C | -1.610755 | -1.966285 | -0.667582 |
| C | -2.868383 | -1.175750 | -0.198382 |
| C | -3.596740 | -0.533362 | -1.383849 |
| C | -3.856880 | -1.946180 | 0.675303  |
| C | 0.609840  | -1.132825 | 0.406830  |
| C | 1.705559  | -1.567453 | -0.547210 |
| C | 2.514713  | -0.380766 | -1.153578 |
| C | 0.820399  | -1.140610 | 1.724469  |
| C | 3.332144  | 0.307565  | -0.133507 |

|                                          |           |           |           |
|------------------------------------------|-----------|-----------|-----------|
| C                                        | -1.089972 | 2.196832  | 1.164173  |
| C                                        | -2.220876 | 1.293311  | 0.614256  |
| C                                        | -0.574249 | 3.401779  | -1.084227 |
| H                                        | -0.509081 | -0.131140 | -1.116288 |
| H                                        | -1.825243 | -0.563046 | 1.608464  |
| H                                        | -1.418057 | -2.842924 | -0.045209 |
| H                                        | -1.585435 | -2.264898 | -1.718272 |
| H                                        | -4.086715 | -1.308332 | -1.981407 |
| H                                        | -2.914441 | 0.005339  | -2.048041 |
| H                                        | -4.369791 | 0.168177  | -1.054943 |
| H                                        | -4.367742 | -2.724961 | 0.099111  |
| H                                        | -4.625382 | -1.280690 | 1.083928  |
| H                                        | -3.350677 | -2.430107 | 1.515225  |
| H                                        | 1.276389  | -2.129922 | -1.382765 |
| H                                        | 2.420759  | -2.221217 | -0.047723 |
| H                                        | 1.856654  | 0.347372  | -1.630911 |
| H                                        | 3.212305  | -0.800061 | -1.887292 |
| H                                        | 1.767452  | -1.472269 | 2.136454  |
| H                                        | 0.071241  | -0.822112 | 2.439182  |
| H                                        | 3.091430  | 1.278532  | 0.283795  |
| H                                        | -1.541947 | 3.113682  | 1.563774  |
| H                                        | -0.551645 | 1.712331  | 1.980036  |
| H                                        | -3.106577 | 1.431628  | 1.243672  |
| H                                        | -2.510751 | 1.643654  | -0.380026 |
| H                                        | -0.945432 | 2.691138  | -1.829615 |
| H                                        | 0.247508  | 3.963923  | -1.526557 |
| H                                        | -1.401603 | 4.071191  | -0.836587 |
| C                                        | -0.064213 | 2.649876  | 0.135581  |
| O                                        | 1.123428  | 2.448139  | 0.281680  |
| O                                        | 4.765473  | -1.449544 | -0.100068 |
| O                                        | 4.384468  | -0.207657 | 0.343006  |
| Rotational constants (GHz):              |           |           |           |
|                                          | 0.5587600 | 0.2682300 | 0.2094500 |
| Vibrational harmonic frequencies (cm-1): |           |           |           |
| 25.6306                                  | 34.8241   | 46.9395   |           |
| 51.8306                                  | 63.8459   | 72.2652   |           |
| 93.8878                                  | 110.0268  | 117.4151  |           |
| 120.9375                                 | 141.7608  | 182.6549  |           |
| 197.3492                                 | 240.5583  | 247.9084  |           |
| 269.9152                                 | 290.1904  | 302.4903  |           |
| 315.5535                                 | 328.1817  | 354.0405  |           |
| 372.3591                                 | 381.8694  | 412.6166  |           |
| 452.7220                                 | 469.6459  | 496.6726  |           |
| 530.9864                                 | 539.9179  | 565.5160  |           |
| 585.7227                                 | 636.0116  | 688.4655  |           |
| 723.3725                                 | 733.4730  | 759.7464  |           |
| 789.3170                                 | 828.4207  | 859.6070  |           |
| 868.2146                                 | 881.7736  | 883.4503  |           |
| 891.0154                                 | 893.1941  | 928.4041  |           |
| 936.7260                                 | 954.9744  | 968.8742  |           |
| 976.8277                                 | 993.8458  | 1001.0305 |           |
| 1010.1859                                | 1028.7466 | 1031.4204 |           |
| 1044.6030                                | 1053.8245 | 1055.1609 |           |
| 1110.0656                                | 1122.9713 | 1170.4739 |           |
| 1175.6314                                | 1193.5051 | 1209.6398 |           |
| 1226.1736                                | 1235.8450 | 1240.4496 |           |
| 1252.4816                                | 1258.7736 | 1264.8459 |           |
| 1280.2529                                | 1312.5615 | 1337.6924 |           |
| 1340.9842                                | 1349.7133 | 1356.9847 |           |
| 1375.6292                                | 1380.9994 | 1386.5227 |           |
| 1403.7902                                | 1407.9046 | 1421.6286 |           |
| 1448.6746                                | 1452.2678 | 1467.9065 |           |

|           |           |           |
|-----------|-----------|-----------|
| 1472.5743 | 1484.2129 | 1485.3511 |
| 1489.9009 | 1495.6882 | 1502.7532 |
| 1509.1725 | 1511.8640 | 1513.2634 |
| 1552.2280 | 1701.5818 | 1779.1081 |
| 3006.6983 | 3010.3414 | 3012.2548 |
| 3018.1384 | 3028.1921 | 3030.5573 |
| 3035.5877 | 3038.1052 | 3040.2827 |
| 3044.9896 | 3068.1732 | 3072.4600 |
| 3079.4748 | 3080.9954 | 3083.1662 |
| 3094.4541 | 3097.5727 | 3098.3206 |
| 3104.0118 | 3113.0166 | 3137.6820 |
| 3138.2582 | 3207.1939 | 3214.9890 |

Zero-point correction (Hartree): 0.363080

### ROOH-1a

-----  
E(RB+HF-LYP/6-311G(d,p)) (Hartree): -811.771218297

Electronic state : 1-A

Cartesian coordinates (Angs):

|   |           |           |           |
|---|-----------|-----------|-----------|
| C | -1.131191 | -1.079697 | -0.305071 |
| C | -1.457763 | 0.232520  | 0.467300  |
| C | -2.669084 | -1.362875 | -0.389311 |
| C | -2.956220 | 0.119891  | -0.004055 |
| C | -3.297985 | 0.963635  | -1.236598 |
| C | -4.000367 | 0.332955  | 1.090619  |
| C | -0.271471 | -2.174927 | 0.281664  |
| C | 0.426572  | -3.066820 | -0.727779 |
| C | 1.760733  | -2.462250 | -1.232180 |
| C | -0.140979 | -2.395652 | 1.591615  |
| C | 2.847731  | -2.568395 | -0.189556 |
| C | 0.815774  | 1.339482  | 0.474573  |
| C | -0.656453 | 1.495924  | 0.153368  |
| C | 3.281931  | 1.832636  | 0.581662  |
| H | -0.752079 | -0.823285 | -1.300294 |
| H | -1.420879 | 0.045965  | 1.545704  |
| H | -2.980912 | -2.060222 | 0.391506  |
| H | -3.061011 | -1.707186 | -1.349966 |
| H | -4.290104 | 0.690321  | -1.610563 |
| H | -2.585978 | 0.811380  | -2.052054 |
| H | -3.312792 | 2.032466  | -1.003072 |
| H | -5.003484 | 0.070888  | 0.736799  |
| H | -4.025834 | 1.380120  | 1.411533  |
| H | -3.784590 | -0.281865 | 1.969312  |
| H | -0.227613 | -3.232863 | -1.589349 |
| H | 0.622508  | -4.051126 | -0.289461 |
| H | 1.650696  | -1.416356 | -1.525434 |
| H | 2.100225  | -3.032893 | -2.107088 |
| H | 0.443353  | -3.228273 | 1.969260  |
| H | -0.607450 | -1.761832 | 2.336590  |
| H | 3.034430  | -3.606751 | 0.171195  |
| H | 0.491123  | 4.651018  | 0.035086  |
| H | 1.102368  | 0.402641  | 0.939064  |
| H | -1.089836 | 2.331926  | 0.713890  |
| H | -0.776996 | 1.761661  | -0.899431 |
| H | 3.376938  | 0.788138  | 0.871896  |
| H | 3.655079  | 2.475713  | 1.384951  |
| H | 3.914400  | 2.002063  | -0.294544 |
| C | 1.850277  | 2.156783  | 0.254669  |
| O | 1.861582  | 3.420347  | -0.310626 |
| O | 0.536565  | 3.927272  | -0.605038 |
| O | 3.491778  | -1.650232 | 0.250538  |

Rotational constants (GHz): 0.3776900 0.3462700 0.2031700  
Vibrational harmonic frequencies (cm-1):

|           |           |           |
|-----------|-----------|-----------|
| 13.6676   | 16.6910   | 31.2794   |
| 53.8765   | 54.4987   | 64.6557   |
| 80.8568   | 89.2703   | 101.1596  |
| 139.6153  | 151.7138  | 172.2774  |
| 175.0278  | 208.4783  | 210.7184  |
| 217.3859  | 237.8238  | 252.3294  |
| 275.6531  | 286.3559  | 319.4015  |
| 340.2975  | 360.4069  | 366.2737  |
| 390.2024  | 400.1229  | 463.4069  |
| 480.6714  | 500.5147  | 519.1162  |
| 558.7026  | 572.7731  | 624.3581  |
| 662.6797  | 719.6082  | 745.1764  |
| 777.7225  | 787.7889  | 823.4594  |
| 864.5706  | 884.8381  | 890.2279  |
| 895.8645  | 899.1136  | 920.2738  |
| 937.0973  | 953.2325  | 958.4338  |
| 987.6276  | 993.0996  | 1006.0516 |
| 1013.2400 | 1022.7651 | 1033.9706 |
| 1049.2040 | 1070.8329 | 1074.9238 |
| 1087.6072 | 1113.8311 | 1120.1500 |
| 1161.5075 | 1187.4593 | 1193.5082 |
| 1209.5850 | 1219.9619 | 1222.7656 |
| 1224.5189 | 1255.8794 | 1266.3197 |
| 1276.4863 | 1307.9954 | 1318.9488 |
| 1338.4796 | 1351.9582 | 1362.5945 |
| 1378.2387 | 1397.3485 | 1402.7377 |
| 1410.9686 | 1420.0818 | 1421.7654 |
| 1423.0594 | 1451.9490 | 1466.2329 |
| 1474.1894 | 1476.9695 | 1486.1708 |
| 1487.9600 | 1495.2226 | 1496.2382 |
| 1497.1532 | 1506.9883 | 1509.4303 |
| 1700.7714 | 1737.5827 | 1813.6844 |
| 2844.3157 | 3008.4287 | 3008.8248 |
| 3016.1509 | 3018.4662 | 3023.1358 |
| 3027.1844 | 3028.3699 | 3034.7162 |
| 3039.9739 | 3062.5853 | 3065.4328 |
| 3068.3726 | 3077.3101 | 3077.9744 |
| 3078.9877 | 3088.6690 | 3094.5216 |
| 3098.1464 | 3133.7991 | 3149.4272 |
| 3170.4780 | 3210.9453 | 3768.9181 |

Zero-point correction (Hartree): 0.361251

#### ROOH-1b

-----  
E(RB+HF-LYP/6-311G(d,p)) (Hartree): -811.779468834

Electronic state : 1-A

Cartesian coordinates (Angs):

|   |           |           |           |
|---|-----------|-----------|-----------|
| C | -1.084167 | 0.792296  | 0.264585  |
| C | -1.821563 | -0.374776 | -0.447433 |
| C | -2.439881 | 1.569116  | 0.304786  |
| C | -3.191583 | 0.227967  | 0.044613  |
| C | -3.712871 | -0.383055 | 1.350255  |
| C | -4.303491 | 0.271045  | -1.001542 |
| C | 0.112861  | 1.478144  | -0.342970 |
| C | 0.812067  | 2.465121  | 0.582891  |
| C | 2.318483  | 2.662700  | 0.316563  |
| C | 0.523560  | 1.267684  | -1.594563 |
| C | 3.032553  | 1.343413  | 0.428933  |
| C | -0.113940 | -2.321584 | -0.670074 |

|                                          |           |           |           |
|------------------------------------------|-----------|-----------|-----------|
| C                                        | -1.478486 | -1.834597 | -0.145562 |
| C                                        | 1.147239  | -1.917097 | 1.518212  |
| H                                        | -0.818780 | 0.479630  | 1.279486  |
| H                                        | -1.773805 | -0.225658 | -1.531601 |
| H                                        | -2.525616 | 2.255480  | -0.541710 |
| H                                        | -2.687387 | 2.105822  | 1.224320  |
| H                                        | -4.552212 | 0.208834  | 1.729132  |
| H                                        | -2.948677 | -0.405514 | 2.132002  |
| H                                        | -4.070416 | -1.406450 | 1.201660  |
| H                                        | -5.160132 | 0.851479  | -0.642266 |
| H                                        | -4.663733 | -0.736390 | -1.237077 |
| H                                        | -3.955549 | 0.729155  | -1.931855 |
| H                                        | 0.684970  | 2.123124  | 1.616339  |
| H                                        | 0.311749  | 3.439070  | 0.534123  |
| H                                        | 2.726238  | 3.334878  | 1.082648  |
| H                                        | 2.526961  | 3.104316  | -0.658915 |
| H                                        | 1.387226  | 1.766957  | -2.015389 |
| H                                        | 0.018882  | 0.571093  | -2.251127 |
| H                                        | 2.800176  | 0.765027  | 1.346197  |
| H                                        | -0.148154 | -3.408582 | -0.806442 |
| H                                        | 0.074182  | -1.906355 | -1.664842 |
| H                                        | -2.249105 | -2.457338 | -0.615415 |
| H                                        | -1.552802 | -2.034203 | 0.926655  |
| H                                        | 2.089787  | -1.802105 | 2.030501  |
| H                                        | 3.712163  | -0.971181 | -0.218672 |
| H                                        | 0.242840  | -1.993964 | 2.103079  |
| C                                        | 1.097039  | -2.029407 | 0.190643  |
| O                                        | 2.181636  | -1.980638 | -0.650777 |
| O                                        | 3.429018  | -1.864660 | 0.069357  |
| O                                        | 3.782381  | 0.884178  | -0.404436 |
| Rotational constants (GHz):              |           |           |           |
|                                          | 0.5904900 | 0.2940300 | 0.2262300 |
| Vibrational harmonic frequencies (cm-1): |           |           |           |
| 37.0078                                  | 51.6710   | 53.4462   |           |
| 70.4517                                  | 76.2694   | 94.4876   |           |
| 120.6321                                 | 121.3916  | 138.4911  |           |
| 153.0828                                 | 186.0120  | 218.8146  |           |
| 225.8127                                 | 238.1231  | 262.0711  |           |
| 273.4776                                 | 282.7768  | 295.3123  |           |
| 301.0921                                 | 356.6044  | 358.6211  |           |
| 376.0459                                 | 397.4605  | 425.2308  |           |
| 458.2497                                 | 482.7579  | 491.7390  |           |
| 515.5330                                 | 538.0885  | 573.1239  |           |
| 583.9733                                 | 626.5941  | 670.9339  |           |
| 706.8141                                 | 745.6192  | 747.5533  |           |
| 785.5024                                 | 794.8398  | 833.9699  |           |
| 837.1420                                 | 867.6131  | 875.0024  |           |
| 886.3237                                 | 909.5372  | 915.8268  |           |
| 925.8514                                 | 927.9006  | 950.1270  |           |
| 957.4139                                 | 971.8885  | 993.4966  |           |
| 1006.4773                                | 1013.1242 | 1028.9564 |           |
| 1032.4619                                | 1054.5020 | 1058.3463 |           |
| 1091.9271                                | 1112.7937 | 1126.5815 |           |
| 1171.3350                                | 1188.6890 | 1204.3081 |           |
| 1209.4806                                | 1220.5483 | 1226.0685 |           |
| 1234.2521                                | 1248.0036 | 1262.7485 |           |
| 1270.3487                                | 1283.9295 | 1318.6449 |           |
| 1336.6800                                | 1346.8482 | 1379.6608 |           |
| 1386.3015                                | 1396.2525 | 1403.2942 |           |
| 1411.3620                                | 1415.2884 | 1420.2834 |           |
| 1438.3889                                | 1451.0245 | 1476.7800 |           |
| 1480.2068                                | 1484.3904 | 1485.6624 |           |

|           |           |           |
|-----------|-----------|-----------|
| 1487.7408 | 1492.4242 | 1495.8770 |
| 1499.0355 | 1508.8237 | 1510.2497 |
| 1703.8032 | 1706.2832 | 1788.8892 |
| 2916.8950 | 3008.9625 | 3013.8955 |
| 3015.0407 | 3018.3460 | 3023.0589 |
| 3024.3562 | 3028.8529 | 3036.5334 |
| 3038.8121 | 3045.5299 | 3056.8951 |
| 3067.0991 | 3072.1726 | 3078.3896 |
| 3079.1372 | 3086.7310 | 3091.1296 |
| 3104.0699 | 3157.1956 | 3182.8894 |
| 3229.6176 | 3273.3318 | 3530.8236 |

Zero-point correction (Hartree): 0.363907

### ROOH-2b

-----  
E(RB+HF-LYP/6-311G(d,p)) (Hartree): -811.780379366

Electronic state : 1-A

Cartesian coordinates (Angs):

|   |           |           |           |
|---|-----------|-----------|-----------|
| C | -0.515168 | 0.440073  | 0.436081  |
| C | 0.852726  | 1.181445  | 0.449682  |
| C | -1.225332 | 1.829191  | 0.366430  |
| C | 0.123251  | 2.479023  | -0.066331 |
| C | 0.190118  | 2.673060  | -1.585222 |
| C | 0.505924  | 3.772185  | 0.650890  |
| C | -0.949662 | -0.498309 | 1.530274  |
| C | -2.323886 | -1.125099 | 1.330554  |
| C | -2.334207 | -2.140211 | 0.211876  |
| C | -0.227254 | -0.766013 | 2.619881  |
| C | -2.975205 | -2.185492 | -0.955821 |
| C | 2.623876  | -0.655180 | 0.276371  |
| C | 2.026866  | 0.610113  | -0.341293 |
| C | 4.484568  | -2.437572 | 0.085044  |
| H | -0.641001 | -0.071929 | -0.524748 |
| H | 1.163665  | 1.364107  | 1.484809  |
| H | -1.543959 | 2.162462  | 1.357785  |
| H | -2.065552 | 1.920294  | -0.325687 |
| H | -0.485585 | 3.480110  | -1.887174 |
| H | -0.106718 | 1.773477  | -2.131025 |
| H | 1.197876  | 2.943918  | -1.913558 |
| H | -0.157099 | 4.594756  | 0.361130  |
| H | 1.530513  | 4.071929  | 0.404434  |
| H | 0.441350  | 3.657388  | 1.736816  |
| H | -3.059909 | -0.344901 | 1.144329  |
| H | -2.612007 | -1.631778 | 2.258029  |
| H | -1.698446 | -3.005823 | 0.379417  |
| H | -4.351880 | 0.438571  | -1.536682 |
| H | -0.599711 | -1.431302 | 3.391989  |
| H | 0.750271  | -0.330062 | 2.788200  |
| H | -2.853828 | -3.031287 | -1.626287 |
| H | 3.030991  | -0.456952 | 1.276298  |
| H | 1.846830  | -1.414339 | 0.435770  |
| H | 2.814951  | 1.367384  | -0.426052 |
| H | 1.722856  | 0.384680  | -1.366565 |
| H | 5.135281  | -2.035404 | 0.869044  |
| H | 5.097136  | -2.943496 | -0.660295 |
| H | 3.807886  | -3.150318 | 0.564964  |
| C | 3.716079  | -1.300580 | -0.566494 |
| O | 3.964316  | -0.933549 | -1.693154 |
| O | -4.133184 | -0.158488 | -0.808326 |
| O | -3.856140 | -1.354375 | -1.586828 |

Rotational constants (GHz): 0.4388600 0.2432700 0.1987800

Vibrational harmonic frequencies (cm-1):

|           |           |           |
|-----------|-----------|-----------|
| 15.0227   | 22.6970   | 38.0961   |
| 43.7594   | 52.5950   | 69.4779   |
| 75.5149   | 79.5104   | 86.7815   |
| 90.4249   | 106.7490  | 135.3391  |
| 168.4700  | 206.5717  | 208.9252  |
| 223.9243  | 237.6968  | 244.6673  |
| 274.3356  | 281.8633  | 326.2540  |
| 343.5139  | 367.9014  | 377.5514  |
| 393.5049  | 453.8760  | 466.7511  |
| 482.3500  | 502.3965  | 527.0341  |
| 564.9807  | 609.0948  | 657.1890  |
| 715.7069  | 734.3790  | 750.9846  |
| 757.8528  | 768.1696  | 808.9238  |
| 847.3710  | 859.8237  | 885.2790  |
| 900.3474  | 907.6749  | 916.0589  |
| 933.7416  | 944.7217  | 946.8519  |
| 951.1691  | 954.1335  | 977.2302  |
| 991.9783  | 998.1952  | 1020.3446 |
| 1031.4916 | 1049.8161 | 1078.1581 |
| 1103.4492 | 1112.0270 | 1133.5241 |
| 1167.9640 | 1182.2299 | 1191.7970 |
| 1209.5982 | 1211.7590 | 1221.4880 |
| 1261.4540 | 1269.7712 | 1273.4106 |
| 1300.9875 | 1306.2006 | 1309.0829 |
| 1331.0879 | 1333.5695 | 1361.7217 |
| 1382.5737 | 1390.8723 | 1393.8098 |
| 1401.7596 | 1408.4173 | 1418.7141 |
| 1435.1984 | 1444.3181 | 1453.7181 |
| 1466.9041 | 1478.0089 | 1483.3126 |
| 1486.4079 | 1486.9492 | 1491.5725 |
| 1496.4231 | 1506.4630 | 1509.2400 |
| 1696.9413 | 1732.8854 | 1793.4235 |
| 3007.7753 | 3008.4817 | 3015.0603 |
| 3018.4499 | 3022.9060 | 3027.7760 |
| 3027.8705 | 3028.3451 | 3035.7716 |
| 3040.0405 | 3065.7872 | 3075.5355 |
| 3077.7339 | 3079.8482 | 3085.2713 |
| 3087.9606 | 3092.5370 | 3120.9215 |
| 3131.3354 | 3137.2564 | 3141.1434 |
| 3173.5681 | 3209.2369 | 3791.7181 |

Zero-point correction (Hartree): 0.361332

**Dioxirane-1a**

-----  
 E(RB+HF-LYP/6-311G(d,p)) (Hartree): -811.779804836

Electronic state : 1-A

Cartesian coordinates (Angs):

|   |           |           |           |
|---|-----------|-----------|-----------|
| C | 1.596445  | 0.118822  | -0.070219 |
| C | 0.851429  | -1.180699 | 0.347824  |
| C | 2.905974  | -0.726132 | -0.203345 |
| C | 2.040687  | -2.023280 | -0.247328 |
| C | 1.808423  | -2.502665 | -1.684897 |
| C | 2.522254  | -3.180321 | 0.625307  |
| C | 1.632775  | 1.356880  | 0.790544  |
| C | 2.087131  | 2.629219  | 0.097306  |
| C | 1.064286  | 3.173572  | -0.932556 |
| C | 1.316040  | 1.370005  | 2.086957  |
| C | -0.253701 | 3.524553  | -0.285558 |
| C | -1.600136 | -0.509954 | 0.581344  |
| C | -0.576579 | -1.397658 | -0.146988 |

|                                          |           |           |           |
|------------------------------------------|-----------|-----------|-----------|
| C                                        | -3.319230 | -0.074595 | -1.311980 |
| H                                        | 1.261273  | 0.396387  | -1.075475 |
| H                                        | 0.875664  | -1.294691 | 1.436667  |
| H                                        | 3.506232  | -0.666456 | 0.707870  |
| H                                        | 3.547387  | -0.527915 | -1.066042 |
| H                                        | 2.731035  | -2.930542 | -2.090031 |
| H                                        | 1.503392  | -1.691520 | -2.351780 |
| H                                        | 1.037157  | -3.277470 | -1.727253 |
| H                                        | 3.451268  | -3.609223 | 0.234350  |
| H                                        | 1.777465  | -3.982670 | 0.661692  |
| H                                        | 2.711075  | -2.850970 | 1.651063  |
| H                                        | 3.030663  | 2.450389  | -0.430436 |
| H                                        | 2.289793  | 3.400694  | 0.846404  |
| H                                        | 0.873178  | 2.458798  | -1.734746 |
| H                                        | 1.474682  | 4.086939  | -1.381757 |
| H                                        | 1.391608  | 2.277676  | 2.676526  |
| H                                        | 0.972157  | 0.486219  | 2.610011  |
| H                                        | -0.193611 | 4.301412  | 0.509431  |
| H                                        | -1.633550 | -0.773765 | 1.641200  |
| H                                        | -1.311990 | 0.542298  | 0.508353  |
| H                                        | -0.858434 | -2.447508 | -0.004559 |
| H                                        | -0.617360 | -1.206337 | -1.224562 |
| H                                        | -3.070561 | 0.989388  | -1.332277 |
| H                                        | -4.378365 | -0.213624 | -1.526489 |
| H                                        | -2.731157 | -0.575196 | -2.085661 |
| C                                        | -3.007604 | -0.650289 | 0.044687  |
| O                                        | -3.661850 | -1.848696 | 0.369923  |
| O                                        | -4.030083 | -0.537777 | 0.997730  |
| O                                        | -1.314087 | 3.023089  | -0.567538 |
| Rotational constants (GHz):              |           |           |           |
|                                          | 0.4028800 | 0.3279000 | 0.2136600 |
| Vibrational harmonic frequencies (cm-1): |           |           |           |
| 19.5152                                  | 36.0817   | 41.0596   |           |
| 48.1892                                  | 57.2389   | 73.6740   |           |
| 81.4968                                  | 88.2957   | 114.3582  |           |
| 145.8565                                 | 169.2469  | 190.5020  |           |
| 211.2766                                 | 216.2776  | 226.4787  |           |
| 247.4697                                 | 275.9983  | 280.4805  |           |
| 322.1744                                 | 346.7354  | 372.6364  |           |
| 377.6988                                 | 382.2749  | 388.2758  |           |
| 443.2145                                 | 472.7030  | 477.6448  |           |
| 494.8335                                 | 502.7979  | 551.5007  |           |
| 578.1073                                 | 649.2855  | 717.5257  |           |
| 730.8356                                 | 746.9365  | 774.9094  |           |
| 791.4034                                 | 822.9878  | 842.3221  |           |
| 868.2249                                 | 877.3188  | 888.7014  |           |
| 894.6437                                 | 920.3160  | 933.2085  |           |
| 950.3968                                 | 955.2988  | 984.3641  |           |
| 995.8118                                 | 1002.6155 | 1017.0546 |           |
| 1026.3227                                | 1039.9812 | 1043.2887 |           |
| 1050.8083                                | 1078.7763 | 1092.7549 |           |
| 1111.3041                                | 1126.1811 | 1177.6043 |           |
| 1180.6810                                | 1201.9273 | 1209.6340 |           |
| 1222.7828                                | 1226.1050 | 1249.1237 |           |
| 1260.9411                                | 1264.6399 | 1274.5666 |           |
| 1293.6210                                | 1312.1727 | 1324.4447 |           |
| 1341.8651                                | 1355.6992 | 1367.8915 |           |
| 1389.0484                                | 1399.5817 | 1405.0665 |           |
| 1414.0897                                | 1421.0927 | 1421.7232 |           |
| 1425.8531                                | 1454.1112 | 1468.8718 |           |
| 1475.5474                                | 1485.2120 | 1486.5694 |           |
| 1488.3167                                | 1490.8659 | 1495.8333 |           |



|           |           |           |
|-----------|-----------|-----------|
| 1498.1364 | 1500.7487 | 1508.8071 |
| 1509.2874 | 1702.3756 | 1805.5870 |
| 2865.0828 | 3010.4129 | 3014.3983 |
| 3016.5773 | 3019.5338 | 3023.8564 |
| 3027.0689 | 3033.8059 | 3039.1796 |
| 3041.5863 | 3051.8168 | 3054.9853 |
| 3062.5534 | 3069.1506 | 3078.5422 |
| 3080.6786 | 3085.9464 | 3092.4945 |
| 3100.8621 | 3101.4366 | 3105.5316 |
| 3137.3576 | 3138.2715 | 3217.1338 |

Zero-point correction (Hartree): 0.362562

### Dioxirane-2a

-----  
 E(RB+HF-LYP/6-311G(d,p)) (Hartree): -811.776816832

Electronic state : 1-A

Cartesian coordinates (Angs):

|   |           |           |           |
|---|-----------|-----------|-----------|
| C | 0.905595  | -0.700523 | 0.533216  |
| C | 1.851347  | -0.194292 | -0.599436 |
| C | 1.953990  | -1.820025 | 0.833963  |
| C | 3.029479  | -1.027161 | 0.032392  |
| C | 3.942119  | -0.220911 | 0.962775  |
| C | 3.865598  | -1.837931 | -0.956131 |
| C | -0.521808 | -1.114709 | 0.231671  |
| C | -1.507965 | -0.815954 | 1.343028  |
| C | -2.992383 | -1.100785 | 1.082645  |
| C | -0.856848 | -1.738871 | -0.899405 |
| C | -3.625357 | -0.209671 | 0.043879  |
| C | 0.726140  | 2.040190  | -1.262890 |
| C | 2.029598  | 1.299336  | -0.871608 |
| C | 0.573886  | 3.516728  | 0.874871  |
| H | 0.901481  | 0.018110  | 1.359585  |
| H | 1.561159  | -0.678656 | -1.536631 |
| H | 1.678585  | -2.753939 | 0.339516  |
| H | 2.173406  | -2.026446 | 1.884683  |
| H | 4.600127  | -0.898017 | 1.516420  |
| H | 3.377624  | 0.358395  | 1.699063  |
| H | 4.577750  | 0.473774  | 0.404508  |
| H | 4.542127  | -2.520642 | -0.430770 |
| H | 4.479796  | -1.184721 | -1.585662 |
| H | 3.231025  | -2.438260 | -1.614303 |
| H | -1.400827 | 0.240477  | 1.615368  |
| H | -1.197087 | -1.378535 | 2.233662  |
| H | -3.540776 | -0.925247 | 2.015958  |
| H | -3.173308 | -2.141030 | 0.799991  |
| H | -1.869019 | -2.056756 | -1.111377 |
| H | -0.123467 | -1.953892 | -1.669028 |
| H | -3.341980 | 0.842217  | 0.064607  |
| H | 0.991968  | 2.921538  | -1.860237 |
| H | 0.080079  | 1.407266  | -1.873576 |
| H | 2.747863  | 1.410788  | -1.691179 |
| H | 2.486948  | 1.793257  | -0.009397 |
| H | 1.129685  | 2.947277  | 1.626855  |
| H | -0.190000 | 4.100388  | 1.387796  |
| H | 1.285954  | 4.177770  | 0.375397  |
| C | -0.100088 | 2.556670  | -0.094339 |
| O | -1.260439 | 2.239342  | 0.063826  |
| O | -4.964953 | -0.463072 | -0.261095 |
| O | -3.855724 | -0.717229 | -1.236361 |

Rotational constants (GHz): 0.5858000 0.2572600 0.2077100

Vibrational harmonic frequencies (cm-1):

|           |           |           |
|-----------|-----------|-----------|
| 34.0742   | 39.4839   | 46.9785   |
| 51.5294   | 64.9223   | 84.6170   |
| 91.5410   | 102.0251  | 114.3131  |
| 116.5890  | 151.5669  | 201.0924  |
| 219.9374  | 233.9337  | 255.9269  |
| 265.1770  | 282.5118  | 287.7278  |
| 304.8929  | 306.4892  | 356.8071  |
| 375.0562  | 408.8492  | 439.6208  |
| 447.1817  | 470.0777  | 497.3392  |
| 520.6050  | 529.0862  | 565.3493  |
| 585.5751  | 609.9220  | 719.7869  |
| 734.7615  | 757.7187  | 788.8773  |
| 800.0926  | 833.9830  | 864.4824  |
| 870.2121  | 882.6787  | 891.2795  |
| 897.3090  | 932.3634  | 940.0232  |
| 953.1819  | 970.1589  | 976.4443  |
| 989.1565  | 994.3839  | 1018.2382 |
| 1029.3695 | 1044.3647 | 1050.2986 |
| 1055.8355 | 1092.5438 | 1111.5485 |
| 1124.9316 | 1164.2167 | 1165.2521 |
| 1184.4367 | 1208.7462 | 1217.1433 |
| 1223.9941 | 1229.8923 | 1240.5320 |
| 1253.7217 | 1272.6247 | 1276.7953 |
| 1282.6549 | 1299.3463 | 1313.1572 |
| 1349.6926 | 1356.0525 | 1360.2495 |
| 1379.1254 | 1386.0837 | 1400.1106 |
| 1403.0096 | 1412.1159 | 1421.6198 |
| 1455.5869 | 1460.6068 | 1467.7938 |
| 1471.0277 | 1480.5683 | 1482.6936 |
| 1483.5531 | 1486.4773 | 1488.1245 |
| 1496.7760 | 1501.0893 | 1509.2152 |
| 1510.6368 | 1704.1094 | 1777.8184 |
| 3000.3130 | 3009.7557 | 3011.7582 |
| 3016.9964 | 3024.2385 | 3028.3029 |
| 3028.9088 | 3034.9898 | 3037.3942 |
| 3040.7794 | 3044.8041 | 3066.1398 |
| 3069.1128 | 3077.4226 | 3080.1549 |
| 3082.2369 | 3083.7749 | 3094.3843 |
| 3097.3052 | 3100.9483 | 3126.0087 |
| 3136.9926 | 3145.0935 | 3226.4214 |

Zero-point correction (Hartree): 0.363654

### Dioxirane-1b

-----  
E(RB+HF-LYP/6-311G(d,p)) (Hartree): -811.777375576

Electronic state : 1-A

Cartesian coordinates (Angs):

|   |           |           |           |
|---|-----------|-----------|-----------|
| C | 0.951150  | -1.220580 | 0.551244  |
| C | 1.587170  | -0.160374 | -0.409441 |
| C | 2.283645  | -2.016939 | 0.449741  |
| C | 3.006578  | -0.727514 | -0.050152 |
| C | 3.699560  | 0.017282  | 1.096560  |
| C | 3.964187  | -0.900177 | -1.227007 |
| C | -0.380007 | -1.860996 | 0.218053  |
| C | -1.484641 | -1.565871 | 1.215340  |
| C | -2.890302 | -2.072172 | 0.868091  |
| C | -0.553351 | -2.616955 | -0.868543 |
| C | -3.517706 | -1.347885 | -0.303798 |
| C | -0.164774 | 1.641997  | -0.753727 |
| C | 1.241841  | 1.312778  | -0.212848 |
| C | -0.166242 | 4.216661  | -0.392183 |

|                                          |           |           |           |
|------------------------------------------|-----------|-----------|-----------|
| H                                        | 0.883231  | -0.777481 | 1.550084  |
| H                                        | 1.360477  | -0.450721 | -1.441927 |
| H                                        | 2.238200  | -2.781691 | -0.328640 |
| H                                        | 2.654225  | -2.475221 | 1.370193  |
| H                                        | 4.580634  | -0.540941 | 1.428247  |
| H                                        | 3.046718  | 0.144911  | 1.963987  |
| H                                        | 4.036463  | 1.010168  | 0.782614  |
| H                                        | 4.858117  | -1.458228 | -0.928518 |
| H                                        | 4.295848  | 0.070011  | -1.613449 |
| H                                        | 3.489827  | -1.443748 | -2.049234 |
| H                                        | -1.526203 | -0.480641 | 1.381664  |
| H                                        | -1.186254 | -1.983724 | 2.185206  |
| H                                        | -3.543448 | -1.878631 | 1.729981  |
| H                                        | -2.915256 | -3.147037 | 0.676621  |
| H                                        | -1.505661 | -3.059924 | -1.130066 |
| H                                        | 0.265153  | -2.816293 | -1.552095 |
| H                                        | -3.411335 | -0.239527 | -0.272836 |
| H                                        | -0.130469 | 1.770772  | -1.841054 |
| H                                        | -0.847934 | 0.816053  | -0.553152 |
| H                                        | 1.990250  | 1.942032  | -0.708468 |
| H                                        | 1.288102  | 1.554720  | 0.854742  |
| H                                        | -0.719809 | 4.982059  | 0.150513  |
| H                                        | -0.196618 | 4.438734  | -1.462363 |
| H                                        | 0.878685  | 4.231960  | -0.072392 |
| C                                        | -0.782345 | 2.869094  | -0.126137 |
| O                                        | -1.288247 | 2.675087  | 1.169567  |
| O                                        | -2.180982 | 2.854024  | -0.021402 |
| O                                        | -4.112213 | -1.883824 | -1.204515 |
| Rotational constants (GHz):              |           |           |           |
|                                          | 0.3950600 | 0.3196000 | 0.2012000 |
| Vibrational harmonic frequencies (cm-1): |           |           |           |
| 27.3752                                  | 34.2171   | 38.1746   |           |
| 42.2164                                  | 62.1142   | 77.8782   |           |
| 85.3740                                  | 109.8469  | 134.8979  |           |
| 153.1084                                 | 181.7388  | 189.0693  |           |
| 212.9585                                 | 227.4352  | 236.8324  |           |
| 252.2835                                 | 258.8354  | 277.7571  |           |
| 299.0178                                 | 354.8922  | 362.9528  |           |
| 366.3005                                 | 389.3683  | 401.8393  |           |
| 428.7420                                 | 448.1689  | 492.7452  |           |
| 509.4969                                 | 516.8692  | 552.2442  |           |
| 581.4683                                 | 617.2271  | 709.7408  |           |
| 719.0282                                 | 744.4321  | 771.5729  |           |
| 781.2373                                 | 825.8281  | 849.4161  |           |
| 863.8468                                 | 880.8302  | 882.8547  |           |
| 894.0724                                 | 918.3214  | 931.3696  |           |
| 948.4857                                 | 955.7089  | 986.0675  |           |
| 993.6115                                 | 1015.5730 | 1023.4559 |           |
| 1030.2551                                | 1047.4144 | 1054.1126 |           |
| 1060.7484                                | 1076.8450 | 1091.2311 |           |
| 1114.1421                                | 1131.1314 | 1167.8671 |           |
| 1190.3058                                | 1206.4528 | 1211.6873 |           |
| 1220.9571                                | 1226.7121 | 1249.1871 |           |
| 1250.0069                                | 1270.6052 | 1279.0568 |           |
| 1294.4172                                | 1308.5985 | 1331.3116 |           |
| 1343.7761                                | 1365.4266 | 1386.3127 |           |
| 1393.8181                                | 1401.0303 | 1407.2330 |           |
| 1417.2669                                | 1422.2581 | 1423.1294 |           |
| 1423.8669                                | 1450.9957 | 1472.3876 |           |
| 1474.2929                                | 1480.9385 | 1485.8643 |           |
| 1487.0536                                | 1488.4636 | 1495.2100 |           |
| 1499.9931                                | 1500.5322 | 1507.5746 |           |

|           |           |           |
|-----------|-----------|-----------|
| 1509.8436 | 1703.4248 | 1811.5205 |
| 2861.3787 | 2998.5027 | 3008.1436 |
| 3010.8423 | 3013.4364 | 3016.6800 |
| 3021.8617 | 3023.1400 | 3033.5859 |
| 3036.4982 | 3041.6818 | 3045.7630 |
| 3055.9454 | 3066.2467 | 3078.0174 |
| 3078.5788 | 3090.7693 | 3092.0319 |
| 3098.9926 | 3102.6648 | 3111.4733 |
| 3139.1487 | 3141.7261 | 3222.9919 |

Zero-point correction (Hartree): 0.362626

### Dioxirane-2b

-----  
 E(RB+HF-LYP/6-311G(d,p)) (Hartree): -811.777164820

Electronic state : 1-A

Cartesian coordinates (Angs):

|   |           |           |           |
|---|-----------|-----------|-----------|
| C | -0.817727 | -0.768291 | -0.159995 |
| C | -1.973077 | 0.068800  | 0.465858  |
| C | -1.862644 | -1.883625 | -0.497956 |
| C | -3.016809 | -0.866923 | -0.254750 |
| C | -3.558297 | -0.311606 | -1.577052 |
| C | -4.166811 | -1.357108 | 0.623428  |
| C | 0.382183  | -1.215875 | 0.638806  |
| C | 1.414881  | -2.007462 | -0.143585 |
| C | 2.384125  | -1.150906 | -0.990364 |
| C | 0.534592  | -0.995397 | 1.944801  |
| C | 3.346561  | -0.354124 | -0.151519 |
| C | -0.983679 | 2.430256  | 0.939298  |
| C | -2.079342 | 1.580211  | 0.256889  |
| C | 0.347136  | 3.016908  | -1.219687 |
| H | -0.478382 | -0.301109 | -1.092492 |
| H | -2.025341 | -0.137414 | 1.539466  |
| H | -1.846221 | -2.677088 | 0.252828  |
| H | -1.810939 | -2.334774 | -1.491780 |
| H | -4.120932 | -1.089612 | -2.102522 |
| H | -2.759558 | 0.020287  | -2.246699 |
| H | -4.234629 | 0.533588  | -1.416692 |
| H | -4.746356 | -2.134518 | 0.114200  |
| H | -4.854671 | -0.540086 | 0.867888  |
| H | -3.797298 | -1.777222 | 1.563063  |
| H | 0.903573  | -2.702142 | -0.818828 |
| H | 2.006503  | -2.620711 | 0.541904  |
| H | 1.830084  | -0.459963 | -1.635736 |
| H | 2.981089  | -1.799178 | -1.636671 |
| H | 1.397466  | -1.376182 | 2.480469  |
| H | -0.174433 | -0.420489 | 2.527020  |
| H | 2.935454  | 0.431688  | 0.478966  |
| H | -1.347982 | 3.463113  | 1.012976  |
| H | -0.785945 | 2.080403  | 1.954232  |
| H | -3.047809 | 1.902036  | 0.656315  |
| H | -2.109312 | 1.815616  | -0.811163 |
| H | -0.045137 | 2.251673  | -1.896611 |
| H | 1.366790  | 3.258224  | -1.517205 |
| H | -0.293758 | 3.896441  | -1.326601 |
| C | 0.352220  | 2.501415  | 0.211463  |
| O | 1.388747  | 2.190719  | 0.757298  |
| O | 4.589533  | -0.062547 | -0.717171 |
| O | 4.426454  | -1.053198 | 0.396107  |

Rotational constants (GHz): 0.5869600 0.2644700 0.2143200

Vibrational harmonic frequencies (cm-1):

|         |         |         |
|---------|---------|---------|
| 16.6007 | 36.9692 | 44.9815 |
|---------|---------|---------|

|           |           |           |
|-----------|-----------|-----------|
| 54.4159   | 61.2654   | 68.2275   |
| 83.0506   | 99.7417   | 106.1207  |
| 116.1092  | 128.8280  | 184.2601  |
| 191.7463  | 229.7580  | 246.4018  |
| 266.9059  | 281.1251  | 287.8118  |
| 307.2446  | 346.6090  | 369.1985  |
| 382.6873  | 411.3972  | 435.4538  |
| 458.9151  | 467.8199  | 494.8627  |
| 500.2301  | 530.1323  | 563.2374  |
| 581.3109  | 653.6587  | 724.5701  |
| 732.0936  | 754.3868  | 781.9434  |
| 794.2018  | 850.8376  | 861.0667  |
| 871.8904  | 876.8029  | 880.6675  |
| 893.9764  | 930.8665  | 938.1197  |
| 954.0710  | 965.8754  | 977.2848  |
| 992.4452  | 1006.2731 | 1014.7445 |
| 1029.8597 | 1033.0908 | 1045.4085 |
| 1051.7823 | 1082.2779 | 1111.0140 |
| 1120.3949 | 1155.4946 | 1168.9967 |
| 1186.1927 | 1207.1449 | 1215.3845 |
| 1226.2930 | 1237.6041 | 1247.4678 |
| 1252.3436 | 1257.3388 | 1264.2582 |
| 1279.3440 | 1301.3936 | 1313.0496 |
| 1339.2764 | 1353.1960 | 1359.2039 |
| 1366.1003 | 1378.2789 | 1385.0515 |
| 1402.8912 | 1408.0700 | 1423.1823 |
| 1454.6979 | 1465.2580 | 1466.9882 |
| 1469.1012 | 1481.9010 | 1483.5966 |
| 1484.7158 | 1487.4008 | 1494.1468 |
| 1499.1553 | 1499.6006 | 1508.6309 |
| 1511.4156 | 1706.5671 | 1783.2885 |
| 3007.5447 | 3009.8797 | 3010.5839 |
| 3018.6765 | 3025.2804 | 3026.8433 |
| 3031.1244 | 3034.4972 | 3037.5045 |
| 3043.1521 | 3062.7068 | 3068.6282 |
| 3070.3540 | 3079.0640 | 3081.7635 |
| 3083.5989 | 3086.3863 | 3091.0479 |
| 3095.4454 | 3097.1456 | 3139.0374 |
| 3141.0985 | 3144.8161 | 3219.0676 |

Zero-point correction (Hartree): 0.363396

#### Acid-2a

-----

E(RB+HF-LYP/6-311G(d,p)) (Hartree): -811.928936113

Electronic state : 1-A

Cartesian coordinates (Angs):

|   |           |           |           |
|---|-----------|-----------|-----------|
| C | -0.883075 | -1.243041 | -0.527103 |
| C | -1.653585 | -0.221005 | 0.374759  |
| C | -2.069823 | -2.229559 | -0.320140 |
| C | -2.972231 | -1.040482 | 0.130731  |
| C | -3.828853 | -0.508542 | -1.024324 |
| C | -3.837217 | -1.276968 | 1.366609  |
| C | 0.530127  | -1.661211 | -0.179711 |
| C | 1.549261  | -1.409200 | -1.273294 |
| C | 3.017633  | -1.699240 | -0.940489 |
| C | 0.838972  | -2.213997 | 0.995592  |
| C | 3.624258  | -0.811747 | 0.123295  |
| C | -0.244834 | 1.900872  | 0.410900  |
| C | -1.590931 | 1.267690  | 0.053048  |
| C | 1.214823  | 4.029454  | 0.299269  |
| H | -0.899264 | -0.876426 | -1.558639 |

|                                          |           |           |           |
|------------------------------------------|-----------|-----------|-----------|
| H                                        | -1.345438 | -0.382417 | 1.414557  |
| H                                        | -1.871637 | -2.923909 | 0.499499  |
| H                                        | -2.394388 | -2.800556 | -1.193860 |
| H                                        | -4.626225 | -1.221334 | -1.257644 |
| H                                        | -3.247241 | -0.356286 | -1.937540 |
| H                                        | -4.300009 | 0.444893  | -0.767625 |
| H                                        | -4.642250 | -1.988898 | 1.154506  |
| H                                        | -4.302356 | -0.345239 | 1.706630  |
| H                                        | -3.246084 | -1.678164 | 2.195188  |
| H                                        | 1.459632  | -0.369180 | -1.606173 |
| H                                        | 1.269705  | -2.014641 | -2.145249 |
| H                                        | 3.614970  | -1.552214 | -1.847253 |
| H                                        | 3.165056  | -2.730809 | -0.620159 |
| H                                        | 1.845966  | -2.507832 | 1.263181  |
| H                                        | 0.079876  | -2.392102 | 1.749786  |
| H                                        | -0.063472 | 1.841643  | 1.492688  |
| H                                        | 0.591593  | 1.351139  | -0.037715 |
| H                                        | -2.383728 | 1.796592  | 0.593523  |
| H                                        | -1.793849 | 1.438762  | -1.007894 |
| H                                        | 1.435940  | 3.979338  | 1.370064  |
| H                                        | 1.184259  | 5.070183  | -0.020599 |
| H                                        | 2.023397  | 3.507486  | -0.222402 |
| C                                        | -0.115696 | 3.360500  | -0.002977 |
| O                                        | -1.015316 | 3.958235  | -0.549535 |
| O                                        | 4.290456  | -1.182289 | 1.054645  |
| O                                        | 3.370216  | 0.506801  | -0.099174 |
| H                                        | 3.809720  | 0.986850  | 0.618655  |
| Rotational constants (GHz):              |           |           |           |
|                                          | 0.4168700 | 0.2920100 | 0.1916100 |
| Vibrational harmonic frequencies (cm-1): |           |           |           |
| 21.8700                                  | 24.8410   | 35.0061   |           |
| 40.2975                                  | 49.4595   | 60.9442   |           |
| 83.0988                                  | 84.2136   | 96.1551   |           |
| 120.8516                                 | 153.5210  | 176.9233  |           |
| 205.4382                                 | 225.5686  | 236.3829  |           |
| 249.1000                                 | 255.3318  | 278.0068  |           |
| 287.7326                                 | 337.8842  | 353.7130  |           |
| 383.3188                                 | 396.5145  | 440.6781  |           |
| 454.4716                                 | 476.7998  | 497.9167  |           |
| 533.6364                                 | 555.1757  | 559.5654  |           |
| 597.0494                                 | 614.7821  | 627.6130  |           |
| 693.4046                                 | 717.0378  | 736.7019  |           |
| 756.4397                                 | 806.0497  | 814.3212  |           |
| 849.1451                                 | 862.8095  | 885.6408  |           |
| 897.3713                                 | 921.5752  | 937.1192  |           |
| 943.0685                                 | 953.8476  | 961.7810  |           |
| 980.5200                                 | 989.1036  | 992.0947  |           |
| 1017.0882                                | 1029.4652 | 1048.4203 |           |
| 1062.0502                                | 1076.4814 | 1114.4844 |           |
| 1134.2831                                | 1151.9255 | 1167.0319 |           |
| 1179.9875                                | 1194.6848 | 1211.8353 |           |
| 1217.0383                                | 1223.2246 | 1243.3286 |           |
| 1256.7859                                | 1265.0917 | 1275.5228 |           |
| 1302.4886                                | 1310.3465 | 1329.7186 |           |
| 1338.6986                                | 1370.7450 | 1373.4327 |           |
| 1384.1597                                | 1391.3499 | 1400.3636 |           |
| 1404.5820                                | 1413.4432 | 1421.2785 |           |
| 1453.2165                                | 1454.4459 | 1470.7875 |           |
| 1475.4575                                | 1478.7117 | 1480.2728 |           |
| 1485.9788                                | 1486.6272 | 1492.9203 |           |
| 1497.3090                                | 1508.7906 | 1509.6137 |           |
| 1703.0524                                | 1794.4026 | 1828.5092 |           |

|           |           |           |
|-----------|-----------|-----------|
| 3007.5693 | 3008.3677 | 3008.6410 |
| 3014.3875 | 3020.0919 | 3027.6818 |
| 3028.9545 | 3033.3529 | 3041.0420 |
| 3041.3183 | 3041.7369 | 3043.6796 |
| 3067.6069 | 3075.0101 | 3077.3072 |
| 3079.6987 | 3084.6560 | 3087.2405 |
| 3095.0280 | 3113.8794 | 3138.1775 |
| 3140.8239 | 3219.4804 | 3756.5063 |

Zero-point correction (Hartree): 0.364264

### Ester-1a

-----  
 E(RB+HF-LYP/6-311G(d,p)) (Hartree): -811.903183961

Electronic state : 1-A

Cartesian coordinates (Angs):

|   |           |           |           |
|---|-----------|-----------|-----------|
| C | 1.588075  | -0.168838 | -0.173230 |
| C | 0.714524  | -1.300709 | 0.436058  |
| C | 2.709837  | -1.228881 | -0.430557 |
| C | 1.656638  | -2.363608 | -0.246028 |
| C | 1.145316  | -2.882670 | -1.594497 |
| C | 2.079638  | -3.529726 | 0.645125  |
| C | 1.971724  | 1.068026  | 0.599247  |
| C | 2.605535  | 2.176106  | -0.221404 |
| C | 1.586936  | 2.944157  | -1.100697 |
| C | 1.808503  | 1.207298  | 1.916197  |
| C | 0.579476  | 3.694543  | -0.262542 |
| C | -1.542333 | -0.145394 | 0.804861  |
| C | -0.785484 | -1.320537 | 0.155494  |
| H | 1.156975  | 0.129740  | -1.135377 |
| H | 0.878331  | -1.354382 | 1.517264  |
| H | 3.447562  | -1.221549 | 0.375420  |
| H | 3.229896  | -1.188891 | -1.391041 |
| H | 1.927508  | -3.467078 | -2.089534 |
| H | 0.862321  | -2.072865 | -2.272359 |
| H | 0.274144  | -3.532941 | -1.470493 |
| H | 2.865584  | -4.124826 | 0.167724  |
| H | 1.235765  | -4.198209 | 0.847381  |
| H | 2.464870  | -3.175612 | 1.605609  |
| H | 3.375429  | 1.759262  | -0.879824 |
| H | 3.112174  | 2.883129  | 0.442981  |
| H | 1.046812  | 2.275808  | -1.773922 |
| H | 2.131638  | 3.677109  | -1.709310 |
| H | 2.137916  | 2.102916  | 2.432445  |
| H | 1.343562  | 0.445021  | 2.529079  |
| H | 1.016044  | 4.476086  | 0.400959  |
| H | -1.381568 | -0.124913 | 1.883755  |
| H | -1.189709 | 0.803034  | 0.388730  |
| H | -1.204103 | -2.263822 | 0.527736  |
| H | -0.970240 | -1.300253 | -0.921372 |
| C | -3.035833 | -0.226809 | 0.585270  |
| O | -3.869935 | -0.348505 | 1.447520  |
| O | -0.608589 | 3.494885  | -0.268864 |
| O | -3.341275 | -0.154562 | -0.732261 |
| C | -4.741532 | -0.217540 | -1.050660 |
| H | -5.277539 | 0.609549  | -0.582449 |
| H | -4.798272 | -0.144505 | -2.134674 |
| H | -5.172837 | -1.158866 | -0.705716 |

Rotational constants (GHz): 0.3891800 0.3054000 0.2018300

Vibrational harmonic frequencies (cm-1):

|         |         |         |
|---------|---------|---------|
| 22.3314 | 24.9822 | 36.4466 |
| 41.4371 | 56.4318 | 64.7094 |

|           |           |           |
|-----------|-----------|-----------|
| 68.8355   | 84.0358   | 107.7033  |
| 119.3896  | 128.5414  | 163.9731  |
| 180.7943  | 210.0082  | 223.4207  |
| 232.8932  | 261.7460  | 274.7582  |
| 291.1069  | 301.5089  | 328.1021  |
| 354.5776  | 378.2334  | 383.9927  |
| 426.3492  | 460.2166  | 489.3284  |
| 500.3303  | 524.7366  | 565.6396  |
| 649.7647  | 653.0074  | 722.1999  |
| 739.0614  | 752.3011  | 781.2554  |
| 794.4886  | 838.5748  | 867.0124  |
| 880.0194  | 880.3129  | 895.3948  |
| 923.9368  | 931.1512  | 951.9541  |
| 957.2156  | 987.9668  | 1001.5949 |
| 1013.5717 | 1022.1310 | 1029.0702 |
| 1044.2251 | 1046.2637 | 1055.1792 |
| 1077.6260 | 1112.9721 | 1123.8964 |
| 1173.4671 | 1175.7564 | 1182.0911 |
| 1200.9220 | 1207.8334 | 1209.2688 |
| 1222.1880 | 1226.2641 | 1249.6005 |
| 1260.8707 | 1267.0698 | 1274.7978 |
| 1299.0030 | 1313.2667 | 1333.4310 |
| 1341.0606 | 1353.6817 | 1362.1495 |
| 1383.9703 | 1402.1220 | 1411.6703 |
| 1418.1202 | 1421.4278 | 1452.9347 |
| 1471.7515 | 1473.3373 | 1477.1622 |
| 1482.4698 | 1486.7051 | 1488.3787 |
| 1492.3756 | 1495.9970 | 1500.4641 |
| 1500.7633 | 1509.5791 | 1511.4493 |
| 1703.0305 | 1806.6165 | 1813.2486 |
| 2850.2746 | 3010.4132 | 3012.5381 |
| 3016.1663 | 3017.8238 | 3021.9138 |
| 3027.4845 | 3036.1026 | 3041.2405 |
| 3046.3792 | 3052.6087 | 3061.2706 |
| 3068.5834 | 3073.4737 | 3079.8418 |
| 3080.9653 | 3087.9365 | 3093.8906 |
| 3099.5432 | 3112.0200 | 3116.3304 |
| 3137.7675 | 3151.8780 | 3216.9445 |

Zero-point correction (Hartree): 0.364298

### Ester-1b

-----  
E(RB+HF-LYP/6-311G(d,p)) (Hartree): -811.908724332

Electronic state : 1-A

Cartesian coordinates (Angs):

|   |           |           |           |
|---|-----------|-----------|-----------|
| C | -1.482984 | 0.628963  | -0.068127 |
| C | -0.125588 | 1.309470  | 0.263874  |
| C | -2.131510 | 2.050068  | -0.144657 |
| C | -0.707209 | 2.673023  | -0.267834 |
| C | -0.351520 | 2.978715  | -1.726761 |
| C | -0.427731 | 3.889051  | 0.612676  |
| C | -2.130912 | -0.377102 | 0.847904  |
| C | -3.389203 | -1.033384 | 0.309463  |
| C | -3.116515 | -2.064314 | -0.812998 |
| C | -1.677161 | -0.677421 | 2.066408  |
| C | -2.299551 | -3.234218 | -0.317009 |
| C | 1.536807  | -0.619706 | 0.230508  |
| C | 1.166064  | 0.751113  | -0.329268 |
| C | 5.095575  | -1.334413 | -0.536930 |
| H | -1.430028 | 0.209320  | -1.079110 |
| H | -0.011689 | 1.399450  | 1.349104  |



|                                          |           |           |           |
|------------------------------------------|-----------|-----------|-----------|
| H                                        | -2.613408 | 2.314676  | 0.799876  |
| H                                        | -2.826793 | 2.243234  | -0.965480 |
| H                                        | -0.934397 | 3.834836  | -2.081171 |
| H                                        | -0.565580 | 2.137769  | -2.392079 |
| H                                        | 0.707692  | 3.229647  | -1.836787 |
| H                                        | -0.999867 | 4.759573  | 0.274212  |
| H                                        | 0.633405  | 4.159145  | 0.585389  |
| H                                        | -0.697061 | 3.695171  | 1.654778  |
| H                                        | -4.065656 | -0.269346 | -0.088920 |
| H                                        | -3.923011 | -1.527014 | 1.127502  |
| H                                        | -2.597988 | -1.617814 | -1.663481 |
| H                                        | -4.078239 | -2.455655 | -1.169232 |
| H                                        | -2.199572 | -1.383564 | 2.703230  |
| H                                        | -0.777184 | -0.236810 | 2.476775  |
| H                                        | -2.758392 | -3.794607 | 0.529919  |
| H                                        | 1.676109  | -0.578002 | 1.311695  |
| H                                        | 0.789844  | -1.374155 | -0.014196 |
| H                                        | 1.987767  | 1.443340  | -0.117846 |
| H                                        | 1.083934  | 0.667106  | -1.417418 |
| H                                        | 5.024511  | -2.424235 | -0.521999 |
| H                                        | 6.022029  | -1.013276 | -0.065764 |
| H                                        | 5.077514  | -1.021963 | -1.583364 |
| C                                        | 3.922079  | -0.735316 | 0.198976  |
| O                                        | 3.997699  | -0.023734 | 1.169916  |
| O                                        | 2.758918  | -1.109912 | -0.376840 |
| O                                        | -1.232590 | -3.569354 | -0.764698 |
| Rotational constants (GHz):              |           |           |           |
|                                          | 0.4062600 | 0.2770400 | 0.1892400 |
| Vibrational harmonic frequencies (cm-1): |           |           |           |
| 20.4619                                  | 23.8013   | 26.2627   |           |
| 37.6332                                  | 42.9890   | 56.4631   |           |
| 69.3846                                  | 71.1763   | 89.7081   |           |
| 105.7155                                 | 124.9922  | 163.4575  |           |
| 185.6414                                 | 213.8349  | 233.1087  |           |
| 246.1832                                 | 276.3048  | 288.0668  |           |
| 303.6949                                 | 320.0974  | 332.5322  |           |
| 364.4960                                 | 380.2754  | 382.6666  |           |
| 448.6698                                 | 461.9133  | 494.5780  |           |
| 501.8944                                 | 541.4499  | 571.7603  |           |
| 611.1790                                 | 648.7690  | 656.9990  |           |
| 723.5780                                 | 745.4115  | 781.1218  |           |
| 788.6492                                 | 842.9926  | 859.4279  |           |
| 874.5947                                 | 879.7669  | 892.5114  |           |
| 926.3391                                 | 934.4240  | 955.8909  |           |
| 959.2070                                 | 978.6629  | 992.9749  |           |
| 1006.3099                                | 1016.3562 | 1030.0772 |           |
| 1043.9675                                | 1048.0161 | 1056.1761 |           |
| 1064.9658                                | 1071.7959 | 1080.2230 |           |
| 1115.8657                                | 1155.7865 | 1182.7872 |           |
| 1196.2699                                | 1209.3910 | 1223.8968 |           |
| 1226.2874                                | 1240.7010 | 1255.4803 |           |
| 1263.4701                                | 1269.5182 | 1279.9775 |           |
| 1314.8423                                | 1325.9949 | 1340.4748 |           |
| 1347.4269                                | 1356.1598 | 1374.8809 |           |
| 1394.7108                                | 1403.7066 | 1413.1223 |           |
| 1422.0829                                | 1422.5739 | 1429.1113 |           |
| 1449.3343                                | 1468.7434 | 1473.1226 |           |
| 1476.2438                                | 1484.7087 | 1487.9348 |           |
| 1488.9927                                | 1489.9474 | 1495.9507 |           |
| 1501.2573                                | 1509.7986 | 1510.8709 |           |
| 1701.4614                                | 1804.6275 | 1814.0632 |           |
| 2850.8566                                | 3010.7223 | 3014.2873 |           |

|           |           |           |
|-----------|-----------|-----------|
| 3018.6030 | 3022.4365 | 3027.1489 |
| 3029.9050 | 3035.6108 | 3039.6135 |
| 3050.5056 | 3061.3706 | 3068.2333 |
| 3070.3635 | 3074.2435 | 3079.7092 |
| 3081.4391 | 3087.7164 | 3092.0367 |
| 3098.8590 | 3110.7124 | 3133.8992 |
| 3138.7054 | 3156.4421 | 3219.6826 |

Zero-point correction (Hartree): 0.363924

### Rad-1a

-----  
 E(UB+HF-LYP/6-311G(d,p)) (Hartree): -736.000973370

Electronic state : 2-A

Cartesian coordinates (Angs):

|   |           |           |           |
|---|-----------|-----------|-----------|
| C | -0.747825 | -1.097382 | 0.008072  |
| C | -1.330436 | 0.339424  | 0.039877  |
| C | -2.182865 | -1.633461 | 0.329024  |
| C | -2.777858 | -0.260299 | -0.113143 |
| C | -3.290713 | -0.302783 | -1.556099 |
| C | -3.833594 | 0.343932  | 0.809970  |
| C | 0.387965  | -1.521742 | 0.905691  |
| C | 1.135577  | -2.771450 | 0.479619  |
| C | 2.081126  | -2.534018 | -0.726345 |
| C | 0.730743  | -0.875277 | 2.022224  |
| C | 3.176253  | -1.552793 | -0.388608 |
| C | 0.634189  | 1.692289  | -0.759857 |
| C | -0.808266 | 1.388143  | -0.965119 |
| C | 2.559414  | 3.026094  | 0.227592  |
| H | -0.502173 | -1.358530 | -1.027191 |
| H | -1.241099 | 0.762908  | 1.043077  |
| H | -2.306084 | -1.805694 | 1.400702  |
| H | -2.520985 | -2.518218 | -0.216506 |
| H | -4.211232 | -0.892821 | -1.608660 |
| H | -2.570339 | -0.758283 | -2.241459 |
| H | -3.517989 | 0.700596  | -1.928397 |
| H | -4.762789 | -0.235305 | 0.777398  |
| H | -4.072175 | 1.371284  | 0.515566  |
| H | -3.487641 | 0.365485  | 1.847145  |
| H | 0.425785  | -3.557944 | 0.200995  |
| H | 1.717688  | -3.158263 | 1.321693  |
| H | 1.539851  | -2.164258 | -1.599355 |
| H | 2.552757  | -3.487711 | -0.995325 |
| H | 1.529786  | -1.238683 | 2.660152  |
| H | 0.235995  | 0.032514  | 2.344967  |
| H | 3.849637  | -1.869217 | 0.438950  |
| H | 1.386839  | 1.045308  | -1.199342 |
| H | -1.388270 | 2.306224  | -0.833803 |
| H | -0.961882 | 1.018808  | -1.984458 |
| H | 3.146804  | 2.120176  | 0.067317  |
| H | 2.763893  | 3.441884  | 1.215031  |
| H | 2.872071  | 3.766420  | -0.516949 |
| C | 1.066700  | 2.777741  | 0.085907  |
| O | 0.246176  | 3.490532  | 0.675777  |
| O | 3.343711  | -0.490180 | -0.935073 |

Rotational constants (GHz): 0.4867500 0.3822200 0.2562800

Vibrational harmonic frequencies (cm-1):

|          |          |          |
|----------|----------|----------|
| 22.7947  | 35.6863  | 42.5816  |
| 52.1553  | 62.4680  | 65.5644  |
| 77.3876  | 95.9889  | 112.2643 |
| 142.9398 | 156.6395 | 183.5900 |
| 203.2882 | 228.3295 | 259.2314 |

|           |           |           |
|-----------|-----------|-----------|
| 266.7218  | 275.3901  | 288.0836  |
| 327.8896  | 353.4430  | 374.4637  |
| 383.3642  | 428.9525  | 465.4696  |
| 482.7361  | 498.1477  | 519.6956  |
| 534.5854  | 563.2636  | 604.4393  |
| 652.4568  | 710.7715  | 728.7349  |
| 754.2979  | 792.1130  | 793.9575  |
| 839.0639  | 869.5393  | 879.2996  |
| 894.8229  | 919.7458  | 934.1054  |
| 946.3325  | 954.6716  | 980.3170  |
| 993.1388  | 998.0475  | 1008.4690 |
| 1023.5183 | 1031.9335 | 1033.3270 |
| 1043.1825 | 1068.3641 | 1085.0968 |
| 1096.1226 | 1132.8973 | 1175.4256 |
| 1192.3937 | 1205.8747 | 1209.2471 |
| 1220.9417 | 1224.0724 | 1232.9064 |
| 1259.6546 | 1265.8701 | 1272.5630 |
| 1306.8371 | 1319.4023 | 1337.7085 |
| 1350.8052 | 1356.3101 | 1392.4210 |
| 1401.9935 | 1409.4675 | 1422.3496 |
| 1422.5453 | 1442.9093 | 1455.0281 |
| 1468.7162 | 1470.8961 | 1482.5907 |
| 1485.2498 | 1485.9274 | 1487.8728 |
| 1491.7596 | 1496.0948 | 1507.3741 |
| 1509.0072 | 1597.0846 | 1701.4337 |
| 1805.0991 | 2867.9086 | 3011.6079 |
| 3016.5984 | 3017.4522 | 3021.6806 |
| 3025.1698 | 3027.8992 | 3028.9349 |
| 3040.4240 | 3057.4997 | 3062.6633 |
| 3070.5639 | 3077.5149 | 3079.7511 |
| 3082.7665 | 3084.8901 | 3093.6182 |
| 3095.7536 | 3098.2711 | 3130.1858 |
| 3135.6750 | 3171.9829 | 3216.0185 |

Zero-point correction (Hartree): 0.345490

### Rad-1b

-----

E(UB+HF-LYP/6-311G(d,p)) (Hartree): -735.984242788

Electronic state : 2-A

Cartesian coordinates (Angs):

|   |           |           |           |
|---|-----------|-----------|-----------|
| C | -0.602898 | -0.726441 | -0.487009 |
| C | -1.594360 | -0.169256 | 0.579289  |
| C | -1.638524 | -1.860080 | -0.779713 |
| C | -2.746251 | -1.027920 | -0.065702 |
| C | -3.611741 | -0.264733 | -1.074358 |
| C | -3.629114 | -1.789576 | 0.921149  |
| C | 0.809516  | -1.130018 | -0.115311 |
| C | 1.828964  | -0.915579 | -1.214721 |
| C | 3.282702  | -1.273154 | -0.887339 |
| C | 1.113394  | -1.670980 | 1.066998  |
| C | 3.908939  | -0.375940 | 0.162216  |
| C | -0.499056 | 2.098695  | 1.201106  |
| C | -1.781648 | 1.335173  | 0.771680  |
| C | -0.280540 | 3.753428  | -0.717828 |
| H | -0.562844 | -0.044201 | -1.341944 |
| H | -1.351074 | -0.609782 | 1.551095  |
| H | -1.387256 | -2.768731 | -0.228062 |
| H | -1.811751 | -2.117827 | -1.827756 |
| H | -4.248754 | -0.965871 | -1.622720 |
| H | -3.010494 | 0.274718  | -1.811509 |
| H | -4.267200 | 0.458959  | -0.579626 |

|                                          |           |           |           |
|------------------------------------------|-----------|-----------|-----------|
| H                                        | -4.286257 | -2.493078 | 0.398578  |
| H                                        | -4.266154 | -1.105962 | 1.493143  |
| H                                        | -3.026580 | -2.361611 | 1.632570  |
| H                                        | 1.782709  | 0.139810  | -1.508494 |
| H                                        | 1.509969  | -1.482681 | -2.098955 |
| H                                        | 3.882186  | -1.133390 | -1.797748 |
| H                                        | 3.407817  | -2.314716 | -0.581422 |
| H                                        | 2.115649  | -1.989007 | 1.322778  |
| H                                        | 0.363787  | -1.819849 | 1.836106  |
| H                                        | 3.616112  | 0.692796  | 0.095264  |
| H                                        | -0.785405 | 2.938381  | 1.843635  |
| H                                        | 0.167421  | 1.453000  | 1.774871  |
| H                                        | -2.551007 | 1.485417  | 1.536984  |
| H                                        | -2.179529 | 1.785612  | -0.143882 |
| H                                        | 0.275789  | 4.152576  | -1.556741 |
| H                                        | -1.231192 | 4.200894  | -0.452644 |
| C                                        | 0.293569  | 2.663540  | 0.028995  |
| O                                        | 1.405006  | 2.225083  | -0.286871 |
| O                                        | 4.685787  | -0.757385 | 1.003093  |
| Rotational constants (GHz):              | 0.5837400 | 0.3140900 | 0.2375600 |
| Vibrational harmonic frequencies (cm-1): |           |           |           |
| 19.6955                                  | 34.3906   | 41.9034   |           |
| 44.6422                                  | 56.6798   | 72.9597   |           |
| 89.7237                                  | 109.5721  | 135.0254  |           |
| 154.3705                                 | 196.4194  | 214.1115  |           |
| 220.6341                                 | 255.0824  | 262.7599  |           |
| 281.8253                                 | 294.9618  | 301.2692  |           |
| 351.5394                                 | 361.9976  | 369.5009  |           |
| 387.7965                                 | 397.9031  | 447.7970  |           |
| 480.5403                                 | 510.4173  | 516.3125  |           |
| 522.8212                                 | 565.3731  | 612.5988  |           |
| 620.4211                                 | 713.0669  | 728.4813  |           |
| 752.5233                                 | 772.3551  | 789.2132  |           |
| 817.8083                                 | 871.1099  | 877.8002  |           |
| 887.8445                                 | 900.5302  | 909.5695  |           |
| 922.9986                                 | 944.3858  | 951.6868  |           |
| 983.5289                                 | 991.4615  | 1004.3095 |           |
| 1020.6497                                | 1027.5695 | 1043.8837 |           |
| 1049.4339                                | 1054.1797 | 1085.9958 |           |
| 1105.1786                                | 1120.6271 | 1163.7436 |           |
| 1185.8234                                | 1205.0995 | 1210.4962 |           |
| 1219.4145                                | 1227.4058 | 1235.9232 |           |
| 1252.6651                                | 1274.0782 | 1277.7116 |           |
| 1285.3169                                | 1313.5602 | 1343.0044 |           |
| 1346.8084                                | 1354.7716 | 1380.1034 |           |
| 1396.0383                                | 1403.5611 | 1413.4360 |           |
| 1422.5622                                | 1426.3376 | 1450.4622 |           |
| 1463.4084                                | 1468.3072 | 1476.1391 |           |
| 1483.0713                                | 1485.3509 | 1486.0217 |           |
| 1495.8839                                | 1498.3232 | 1507.1508 |           |
| 1510.1984                                | 1585.5611 | 1701.5066 |           |
| 1804.2144                                | 2907.8526 | 3000.3525 |           |
| 3008.8387                                | 3011.3145 | 3014.7949 |           |
| 3018.5252                                | 3029.8731 | 3031.7499 |           |
| 3037.7017                                | 3040.7491 | 3042.1067 |           |
| 3058.0493                                | 3066.9861 | 3076.5227 |           |
| 3078.9379                                | 3083.5218 | 3083.6620 |           |
| 3096.1101                                | 3103.9377 | 3140.9839 |           |
| 3147.9636                                | 3224.5483 | 3255.5887 |           |
| Zero-point correction (Hartree):         | 0.345305  |           |           |

Rad-2b

-----  
 E(UB+HF-LYP/6-311G(d,p)) (Hartree): -735.995873897

Electronic state : 2-A

Cartesian coordinates (Angs):

|   |           |           |           |
|---|-----------|-----------|-----------|
| C | -0.399018 | -0.725558 | -0.186128 |
| C | -1.689424 | -0.260206 | 0.547511  |
| C | -1.178250 | -1.995380 | -0.669807 |
| C | -2.522681 | -1.305946 | -0.287719 |
| C | -3.218900 | -0.723944 | -1.522849 |
| C | -3.502335 | -2.154963 | 0.520918  |
| C | 0.890955  | -0.985983 | 0.548361  |
| C | 2.092875  | -1.305683 | -0.335376 |
| C | 3.015033  | -0.140404 | -0.473950 |
| C | 1.023124  | -0.983986 | 1.875170  |
| C | 4.434175  | -0.297792 | -0.422332 |
| C | -1.072570 | 2.196876  | 1.128463  |
| C | -2.116652 | 1.209704  | 0.551439  |
| C | -0.517112 | 3.382737  | -1.121452 |
| H | -0.192569 | -0.078142 | -1.047196 |
| H | -1.655472 | -0.612172 | 1.582984  |
| H | -0.959214 | -2.855963 | -0.033943 |
| H | -1.059184 | -2.287723 | -1.715780 |
| H | -3.602626 | -1.536144 | -2.148165 |
| H | -2.538901 | -0.131549 | -2.142142 |
| H | -4.066716 | -0.087675 | -1.250914 |
| H | -3.905566 | -2.973498 | -0.084808 |
| H | -4.349598 | -1.555458 | 0.871736  |
| H | -3.017066 | -2.595222 | 1.396511  |
| H | 1.742422  | -1.610177 | -1.332862 |
| H | 2.664685  | -2.151010 | 0.054990  |
| H | 2.604914  | 0.858252  | -0.586380 |
| H | 1.973782  | -1.216277 | 2.342568  |
| H | 0.203748  | -0.748073 | 2.543050  |
| H | 5.028104  | 0.627853  | -0.542407 |
| H | -1.599647 | 3.093933  | 1.477121  |
| H | -0.546919 | 1.768006  | 1.982819  |
| H | -3.033583 | 1.292814  | 1.144820  |
| H | -2.390713 | 1.527604  | -0.458100 |
| H | -0.827984 | 2.643189  | -1.866352 |
| H | 0.297365  | 3.970763  | -1.543198 |
| H | -1.380655 | 4.021396  | -0.919948 |
| C | -0.023355 | 2.676018  | 0.133127  |
| O | 1.162753  | 2.522696  | 0.330480  |
| O | 5.001774  | -1.382404 | -0.260062 |

Rotational constants (GHz): 0.5653900 0.3076400 0.2320800

Vibrational harmonic frequencies (cm-1):

|          |          |          |
|----------|----------|----------|
| 6.9898   | 22.6855  | 32.0784  |
| 46.8777  | 53.4076  | 62.3208  |
| 86.3038  | 113.6982 | 122.6245 |
| 140.5783 | 172.2606 | 194.4037 |
| 210.1081 | 232.4167 | 247.1300 |
| 282.6910 | 290.2536 | 305.9498 |
| 325.6262 | 349.7217 | 369.2866 |
| 379.5548 | 410.0178 | 457.8312 |
| 466.9879 | 501.4217 | 531.4181 |
| 567.1264 | 587.3345 | 649.5677 |
| 655.8690 | 703.9605 | 729.4419 |
| 734.2164 | 770.8908 | 790.9944 |
| 863.3311 | 882.2427 | 886.2788 |
| 891.8120 | 912.3798 | 925.1400 |

|           |           |           |
|-----------|-----------|-----------|
| 945.2314  | 954.5349  | 972.3305  |
| 981.7425  | 992.0435  | 997.6040  |
| 1003.3525 | 1023.3650 | 1029.4998 |
| 1044.0084 | 1053.1524 | 1109.8581 |
| 1122.4000 | 1143.5288 | 1169.7898 |
| 1177.2227 | 1193.0125 | 1207.3072 |
| 1226.0321 | 1233.4694 | 1249.1164 |
| 1251.9659 | 1262.8274 | 1279.8768 |
| 1290.5162 | 1315.3838 | 1344.2694 |
| 1355.9961 | 1379.3804 | 1385.3752 |
| 1395.8853 | 1404.2344 | 1408.5033 |
| 1422.3822 | 1441.9372 | 1452.4136 |
| 1468.4815 | 1471.4828 | 1472.4825 |
| 1484.1167 | 1484.7176 | 1488.1136 |
| 1494.8458 | 1502.9223 | 1509.8494 |
| 1512.1825 | 1573.9897 | 1701.9478 |
| 1782.2652 | 2930.5900 | 2978.4745 |
| 3009.6873 | 3010.4990 | 3013.3221 |
| 3017.9059 | 3029.8995 | 3034.9144 |
| 3040.4702 | 3045.6442 | 3068.0560 |
| 3071.5587 | 3077.3495 | 3078.8472 |
| 3080.5673 | 3082.4350 | 3093.1927 |
| 3098.3817 | 3103.6928 | 3137.4731 |
| 3140.0386 | 3177.8942 | 3217.0780 |

Zero-point correction (Hartree): 0.345530

**TS1: MPW1B95/6-31+G\*\* at T = 300 K**

Scan-277-freq

-----

E(RmPW+HF-B95/6-31+G(d,p)) (Hartree): -811.053745292

Electronic state : 1-A

Cartesian coordinates (Angs):

|   |           |           |           |
|---|-----------|-----------|-----------|
| C | -1.587586 | 0.829422  | 0.474024  |
| C | -1.546295 | -0.504389 | -0.349916 |
| C | -3.091319 | 0.905395  | 0.152583  |
| C | -3.094999 | -0.588463 | -0.213304 |
| C | -3.552254 | -1.434385 | 0.967362  |
| C | -3.842242 | -0.986559 | -1.470388 |
| C | -0.719390 | 2.016099  | 0.133476  |
| C | 0.506086  | 2.277824  | 0.986279  |
| C | 1.810782  | 1.846478  | 0.292086  |
| C | -0.989288 | 2.828305  | -0.890765 |
| C | 1.621604  | 0.502498  | -0.324055 |
| C | 1.460767  | -0.662100 | 0.385104  |
| C | 0.719597  | -1.790649 | -0.261219 |
| C | -0.772636 | -1.737339 | 0.091003  |
| C | 1.668940  | -0.741495 | 1.862674  |
| H | -1.449881 | 0.587589  | 1.533971  |
| H | -1.295684 | -0.253479 | -1.388165 |
| H | -3.287225 | 1.528237  | -0.720683 |
| H | -3.751470 | 1.226952  | 0.960927  |
| H | -4.622490 | -1.288660 | 1.132314  |
| H | -3.036548 | -1.159513 | 1.890647  |
| H | -3.384908 | -2.500012 | 0.794160  |
| H | -4.922745 | -0.890369 | -1.334243 |
| H | -3.634369 | -2.026981 | -1.736793 |
| H | -3.551672 | -0.359230 | -2.315926 |
| H | 0.410764  | 1.738684  | 1.931781  |
| H | 0.568467  | 3.340088  | 1.233862  |
| H | 2.636326  | 1.836634  | 1.007728  |

|                                          |           |           |           |
|------------------------------------------|-----------|-----------|-----------|
| H                                        | 2.069654  | 2.566674  | -0.485214 |
| H                                        | -0.353415 | 3.678723  | -1.110362 |
| H                                        | -1.836729 | 2.680028  | -1.547615 |
| H                                        | 1.306061  | 0.487778  | -1.362392 |
| H                                        | 1.124753  | -2.751897 | 0.063037  |
| H                                        | 0.837447  | -1.734140 | -1.346897 |
| H                                        | -1.251731 | -2.607376 | -0.372348 |
| H                                        | -0.895176 | -1.874031 | 1.170307  |
| H                                        | 0.726418  | -0.576638 | 2.395232  |
| H                                        | 2.389609  | -0.004820 | 2.213781  |
| H                                        | 2.031297  | -1.731642 | 2.142524  |
| O                                        | 3.955899  | -0.922985 | -1.039811 |
| O                                        | 3.827185  | 0.344309  | -1.000847 |
| O                                        | 3.669748  | -1.480881 | 0.070746  |
| Rotational constants (GHz):              | 0.6891300 | 0.2762700 | 0.2327200 |
| Vibrational harmonic frequencies (cm-1): |           |           |           |
| -152.2787                                | 43.8674   | 54.9791   |           |
| 70.9521                                  | 74.4454   | 95.8409   |           |
| 127.0494                                 | 156.5557  | 162.6101  |           |
| 172.3782                                 | 202.4156  | 216.4827  |           |
| 232.8688                                 | 240.5965  | 262.0498  |           |
| 279.4828                                 | 288.8518  | 312.1514  |           |
| 322.4894                                 | 327.4678  | 354.1637  |           |
| 398.9480                                 | 410.7992  | 428.2991  |           |
| 436.0660                                 | 448.2027  | 490.7176  |           |
| 512.1326                                 | 557.8095  | 570.1191  |           |
| 587.9402                                 | 639.9738  | 726.5876  |           |
| 758.3977                                 | 762.3729  | 768.6446  |           |
| 826.1386                                 | 839.2096  | 866.3958  |           |
| 885.7731                                 | 917.0325  | 920.1897  |           |
| 932.8648                                 | 935.0419  | 955.9604  |           |
| 959.1656                                 | 985.7891  | 1004.0249 |           |
| 1009.1169                                | 1022.1239 | 1024.0725 |           |
| 1027.7113                                | 1045.3589 | 1054.0362 |           |
| 1063.4102                                | 1106.0392 | 1135.5302 |           |
| 1143.9644                                | 1163.8717 | 1167.5421 |           |
| 1177.9800                                | 1205.8660 | 1211.4496 |           |
| 1217.2467                                | 1228.4721 | 1234.5266 |           |
| 1253.3775                                | 1263.8128 | 1271.2528 |           |
| 1276.4539                                | 1305.5289 | 1324.8387 |           |
| 1341.9168                                | 1349.1947 | 1355.4569 |           |
| 1374.3355                                | 1386.8670 | 1403.3944 |           |
| 1410.0530                                | 1420.2715 | 1421.0736 |           |
| 1436.1906                                | 1453.5275 | 1477.8846 |           |
| 1484.1976                                | 1488.2656 | 1489.0624 |           |
| 1495.1538                                | 1499.3638 | 1502.5238 |           |
| 1508.1542                                | 1512.2368 | 1514.0827 |           |
| 1514.5088                                | 1632.0467 | 1732.0626 |           |
| 3051.2839                                | 3056.2407 | 3057.1158 |           |
| 3064.8651                                | 3065.7958 | 3068.7314 |           |
| 3077.2038                                | 3087.5488 | 3095.0262 |           |
| 3097.5482                                | 3107.2152 | 3132.4771 |           |
| 3133.3222                                | 3134.3306 | 3142.6337 |           |
| 3144.1748                                | 3145.3550 | 3147.6187 |           |
| 3151.2786                                | 3159.3327 | 3188.0389 |           |
| 3188.5763                                | 3208.9558 | 3275.7993 |           |
| Zero-point correction (Hartree):         | 0.368239  |           |           |

TS2: MPW1B95/6-31+G\*\* at T = 300 K  
Scan-280-B-OK

-----  
 E(RmPW+HF-B95/6-31+G(d,p)) (Hartree): -811.052135593  
 Electronic state : 1-A

Cartesian coordinates (Angs):

|   |           |           |           |
|---|-----------|-----------|-----------|
| C | -1.591399 | 0.824468  | 0.483166  |
| C | -1.561675 | -0.502446 | -0.353121 |
| C | -3.097113 | 0.908846  | 0.171973  |
| C | -3.109192 | -0.582129 | -0.205048 |
| C | -3.559052 | -1.435968 | 0.972706  |
| C | -3.868115 | -0.968071 | -1.458905 |
| C | -0.723210 | 2.012286  | 0.145595  |
| C | 0.506915  | 2.269971  | 0.993163  |
| C | 1.808508  | 1.841973  | 0.287976  |
| C | -0.997484 | 2.831551  | -0.871808 |
| C | 1.603337  | 0.502870  | -0.339856 |
| C | 1.439423  | -0.661511 | 0.356343  |
| C | 0.701766  | -1.784502 | -0.297598 |
| C | -0.786517 | -1.741591 | 0.068706  |
| C | 1.661079  | -0.761382 | 1.834240  |
| H | -1.447606 | 0.573802  | 1.540269  |
| H | -1.318136 | -0.241996 | -1.390641 |
| H | -3.295461 | 1.538605  | -0.695732 |
| H | -3.751073 | 1.227513  | 0.986554  |
| H | -4.627455 | -1.288851 | 1.148164  |
| H | -3.034303 | -1.170131 | 1.893561  |
| H | -3.395701 | -2.500517 | 0.789268  |
| H | -4.947195 | -0.869516 | -1.313257 |
| H | -3.665601 | -2.006994 | -1.734977 |
| H | -3.582234 | -0.335206 | -2.301914 |
| H | 0.417672  | 1.724782  | 1.935728  |
| H | 0.570070  | 3.330882  | 1.246916  |
| H | 2.631344  | 1.832303  | 1.008080  |
| H | 2.066440  | 2.570180  | -0.481610 |
| H | -0.361715 | 3.682624  | -1.089213 |
| H | -1.847836 | 2.688071  | -1.525892 |
| H | 1.294878  | 0.497200  | -1.378811 |
| H | 1.119155  | -2.747086 | 0.009349  |
| H | 0.817129  | -1.711174 | -1.381561 |
| H | -1.269811 | -2.605799 | -0.401177 |
| H | -0.902901 | -1.890161 | 1.147385  |
| H | 0.724806  | -0.587884 | 2.375668  |
| H | 2.387691  | -0.033686 | 2.195527  |
| H | 2.011080  | -1.758108 | 2.104141  |
| O | 4.247767  | -0.583008 | -0.396680 |
| O | 3.780562  | 0.175274  | -1.299862 |
| O | 3.577063  | -1.647897 | -0.229834 |

Rotational constants (GHz): 0.6957700 0.2730900 0.2301700

Vibrational harmonic frequencies (cm-1):

|          |          |          |
|----------|----------|----------|
| -90.4365 | 40.7365  | 55.3623  |
| 69.1266  | 76.6580  | 85.4522  |
| 130.9664 | 136.3114 | 158.7608 |
| 173.0866 | 202.2915 | 217.1511 |
| 234.2944 | 241.0419 | 263.7439 |
| 280.8500 | 292.7719 | 312.9113 |
| 324.7678 | 330.0218 | 354.2997 |
| 400.7246 | 411.5010 | 419.5248 |
| 429.9577 | 453.1624 | 494.5924 |
| 513.3434 | 559.0528 | 572.2085 |
| 588.0267 | 640.3825 | 726.4385 |
| 758.7900 | 762.8823 | 769.6162 |
| 825.6000 | 840.3636 | 866.6413 |



|           |           |           |
|-----------|-----------|-----------|
| 886.6700  | 916.7920  | 922.1565  |
| 933.5633  | 934.6443  | 956.0223  |
| 959.2206  | 986.5659  | 1003.0506 |
| 1010.7433 | 1021.7749 | 1024.4921 |
| 1028.7428 | 1046.8311 | 1054.6649 |
| 1062.2286 | 1102.0296 | 1133.8771 |
| 1142.8427 | 1165.4626 | 1171.9167 |
| 1187.1972 | 1205.2460 | 1212.1274 |
| 1228.6191 | 1233.6972 | 1240.4555 |
| 1252.5128 | 1261.9687 | 1271.2075 |
| 1274.4196 | 1305.0169 | 1324.6364 |
| 1340.3477 | 1346.0232 | 1355.0753 |
| 1373.5310 | 1387.4803 | 1403.0933 |
| 1409.0340 | 1419.2306 | 1420.8605 |
| 1432.7982 | 1453.8791 | 1479.5609 |
| 1485.4495 | 1489.0072 | 1489.5707 |
| 1494.4647 | 1500.0976 | 1502.9238 |
| 1510.3308 | 1513.1517 | 1514.6769 |
| 1517.5695 | 1648.9711 | 1732.0934 |
| 3051.0192 | 3055.9065 | 3056.5876 |
| 3063.4842 | 3065.6144 | 3065.9163 |
| 3079.8437 | 3082.2819 | 3091.1804 |
| 3097.0810 | 3103.9214 | 3132.0913 |
| 3132.2473 | 3135.6572 | 3141.0427 |
| 3144.1224 | 3145.2291 | 3147.7174 |
| 3150.9939 | 3159.2523 | 3179.0638 |
| 3188.6952 | 3223.9634 | 3276.1150 |

Zero-point correction (Hartree): 0.368296

**TS3: MPW1B95/6-31+G\*\* at T = 300 K**

Scan-265-external-freq

-----  
E(RmPW+HF-B95/6-31+G(d,p)) (Hartree): -811.051682962

Electronic state : 1-A

Cartesian coordinates (Angs):

|   |           |           |           |
|---|-----------|-----------|-----------|
| C | 0.030812  | 0.467110  | 0.446377  |
| C | -1.266052 | 0.749015  | -0.385428 |
| C | 0.306856  | 1.984582  | 0.423980  |
| C | -1.148443 | 2.252413  | 0.002912  |
| C | -1.997933 | 2.633342  | 1.207256  |
| C | -1.361431 | 3.235346  | -1.131081 |
| C | 1.115003  | -0.419552 | -0.096964 |
| C | 1.368122  | -1.796487 | 0.470054  |
| C | 0.758361  | -2.904304 | -0.412856 |
| C | 1.730454  | -0.103641 | -1.309214 |
| C | -0.578480 | -2.444728 | -0.912267 |
| C | -1.654420 | -2.231060 | -0.149615 |
| C | -2.752523 | -1.349548 | -0.659259 |
| C | -2.592047 | 0.064777  | -0.087963 |
| C | -1.755469 | -2.665450 | 1.280784  |
| H | -0.236351 | 0.127111  | 1.450585  |
| H | -1.026303 | 0.636689  | -1.450786 |
| H | 1.032940  | 2.248846  | -0.347155 |
| H | 0.646223  | 2.424432  | 1.361408  |
| H | -1.725803 | 3.634913  | 1.548538  |
| H | -1.843061 | 1.948566  | 2.044718  |
| H | -3.064583 | 2.639711  | 0.970126  |
| H | -1.121866 | 4.254726  | -0.817528 |
| H | -2.401765 | 3.228488  | -1.469140 |

|                                           |           |           |           |
|-------------------------------------------|-----------|-----------|-----------|
| H                                         | -0.728101 | 2.991227  | -1.987258 |
| H                                         | 0.942050  | -1.845832 | 1.473825  |
| H                                         | 2.447146  | -1.946677 | 0.573617  |
| H                                         | 0.696727  | -3.831697 | 0.162873  |
| H                                         | 1.418831  | -3.108984 | -1.257480 |
| H                                         | 2.278330  | -0.864853 | -1.848852 |
| H                                         | 1.417425  | 0.759244  | -1.881347 |
| H                                         | -0.612003 | -2.077579 | -1.935312 |
| H                                         | -3.739546 | -1.736047 | -0.386475 |
| H                                         | -2.709487 | -1.301799 | -1.750860 |
| H                                         | -3.390996 | 0.695434  | -0.493816 |
| H                                         | -2.753261 | 0.042879  | 0.994465  |
| H                                         | -1.656969 | -1.815435 | 1.964247  |
| H                                         | -0.991306 | -3.393682 | 1.549952  |
| H                                         | -2.733697 | -3.112393 | 1.475847  |
| O                                         | 3.704939  | 0.389775  | 0.482306  |
| O                                         | 3.472311  | 0.857713  | -0.713031 |
| O                                         | 2.652572  | 0.573989  | 1.222663  |
| Rotational constants (GHz):               |           |           |           |
|                                           | 0.4816900 | 0.4086100 | 0.2634800 |
| Vibrational harmonic frequencies (cm-1):  |           |           |           |
| -365.0873                                 | 40.6900   | 67.9735   |           |
| 81.0837                                   | 105.4710  | 125.4522  |           |
| 144.1657                                  | 155.2975  | 168.5797  |           |
| 198.5941                                  | 210.7819  | 222.0809  |           |
| 233.5545                                  | 248.3559  | 266.3520  |           |
| 280.3231                                  | 301.4355  | 312.4507  |           |
| 320.7259                                  | 333.2912  | 357.5416  |           |
| 394.6786                                  | 399.3398  | 433.4917  |           |
| 444.7951                                  | 488.1440  | 496.7542  |           |
| 519.0541                                  | 555.5252  | 574.1543  |           |
| 595.4180                                  | 640.9335  | 757.9829  |           |
| 761.7556                                  | 767.1211  | 815.0796  |           |
| 818.8122                                  | 830.5011  | 870.5916  |           |
| 879.9129                                  | 891.9277  | 916.1608  |           |
| 936.3456                                  | 945.8073  | 958.7200  |           |
| 959.2533                                  | 980.2663  | 997.0599  |           |
| 1003.5907                                 | 1012.1256 | 1019.8018 |           |
| 1026.9712                                 | 1044.7285 | 1050.5129 |           |
| 1063.7952                                 | 1091.3459 | 1101.9546 |           |
| 1118.1671                                 | 1129.1931 | 1141.4483 |           |
| 1169.3442                                 | 1172.3089 | 1187.2036 |           |
| 1211.6889                                 | 1224.5794 | 1231.7795 |           |
| 1246.4757                                 | 1255.9839 | 1260.9870 |           |
| 1267.8473                                 | 1301.9763 | 1323.5727 |           |
| 1332.3403                                 | 1341.4961 | 1349.4104 |           |
| 1368.0915                                 | 1376.2154 | 1395.2090 |           |
| 1404.4737                                 | 1414.9953 | 1420.3108 |           |
| 1425.5839                                 | 1434.6087 | 1471.9971 |           |
| 1477.0854                                 | 1487.7009 | 1487.9508 |           |
| 1494.5369                                 | 1496.1920 | 1498.2294 |           |
| 1502.1550                                 | 1510.8345 | 1511.9956 |           |
| 1517.8283                                 | 1558.2860 | 1769.4723 |           |
| 3045.8602                                 | 3055.9626 | 3056.8337 |           |
| 3061.3705                                 | 3064.7853 | 3067.6209 |           |
| 3073.9581                                 | 3087.5620 | 3100.5711 |           |
| 3101.9750                                 | 3111.6446 | 3121.8255 |           |
| 3124.8454                                 | 3127.4843 | 3134.0958 |           |
| 3142.1330                                 | 3144.1144 | 3144.8590 |           |
| 3146.5766                                 | 3168.8030 | 3172.5044 |           |
| 3176.9808                                 | 3203.0213 | 3300.5850 |           |
| Zero-point correction (Hartree): 0.367797 |           |           |           |

### B3LYP-Optimization

-----  
E(RB+HF-LYP/6-311G(d,p)) (Hartree): -811.619173890

Electronic state : 1-A

Cartesian coordinates (Angs):

|   |           |           |           |
|---|-----------|-----------|-----------|
| C | 0.159452  | 0.483816  | 0.354495  |
| C | -1.168507 | 0.974331  | -0.365115 |
| C | 0.664335  | 1.952843  | 0.306208  |
| C | -0.771222 | 2.456265  | -0.006983 |
| C | -1.452076 | 3.009096  | 1.251545  |
| C | -0.900398 | 3.454419  | -1.156205 |
| C | 1.041807  | -0.593037 | -0.246677 |
| C | 1.019406  | -2.005402 | 0.326190  |
| C | 0.143448  | -2.992716 | -0.501299 |
| C | -1.123480 | -2.294404 | -0.915376 |
| C | -2.149115 | -1.968090 | -0.123666 |
| C | -3.058823 | -0.839460 | -0.541649 |
| C | -2.568194 | 0.503978  | 0.054182  |
| C | -2.367385 | -2.527388 | 1.258872  |
| H | -0.075461 | 0.202430  | 1.384143  |
| H | -1.048375 | 0.835463  | -1.445704 |
| H | 1.359027  | 2.128068  | -0.516370 |
| H | 1.130574  | 2.321294  | 1.220956  |
| H | -0.980178 | 3.954250  | 1.538204  |
| H | -1.361482 | 2.328859  | 2.102730  |
| H | -2.515994 | 3.206386  | 1.089980  |
| H | -0.466222 | 4.423172  | -0.886276 |
| H | -1.950925 | 3.625041  | -1.417088 |
| H | -0.386735 | 3.096834  | -2.053480 |
| H | 0.639496  | -1.966457 | 1.349394  |
| H | 2.042745  | -2.390784 | 0.382544  |
| H | -0.039288 | -3.889280 | 0.098691  |
| H | 0.696126  | -3.316736 | -1.387423 |
| H | -1.089265 | -1.826639 | -1.896649 |
| H | -4.090655 | -1.011806 | -0.213349 |
| H | -3.076962 | -0.759610 | -1.633302 |
| H | -3.281274 | 1.280872  | -0.248937 |
| H | -2.628930 | 0.457397  | 1.146678  |
| H | -2.311269 | -1.746220 | 2.025490  |
| H | -1.646898 | -3.303560 | 1.518612  |
| H | -3.370765 | -2.962409 | 1.333402  |
| C | 1.766833  | -0.364643 | -1.382076 |
| H | 1.727103  | 0.577886  | -1.910150 |
| H | 2.290094  | -1.171427 | -1.880209 |
| O | 3.862616  | 0.300936  | -0.581563 |
| O | 3.850726  | -0.312056 | 0.544036  |
| O | 2.914037  | 0.062286  | 1.340456  |

Rotational constants (GHz): 0.4656500 0.3744300 0.2451000

Vibrational harmonic frequencies (cm-1):

|          |          |          |
|----------|----------|----------|
| -51.0660 | 42.0115  | 46.5123  |
| 59.0905  | 65.3792  | 104.4408 |
| 116.8535 | 141.4584 | 157.7893 |
| 165.4678 | 174.3365 | 219.9118 |
| 225.8419 | 240.6853 | 247.9763 |
| 275.9184 | 293.4783 | 303.8381 |
| 305.7798 | 334.7467 | 356.6572 |
| 394.9444 | 399.9236 | 411.9202 |
| 435.9453 | 451.5619 | 489.4656 |
| 509.8488 | 554.4080 | 568.5974 |

|           |           |           |
|-----------|-----------|-----------|
| 591.1458  | 640.8724  | 739.6245  |
| 743.1260  | 752.3089  | 757.2873  |
| 812.9304  | 824.7796  | 849.0222  |
| 873.2144  | 893.9195  | 900.5060  |
| 915.7669  | 934.9856  | 941.9802  |
| 952.7955  | 963.2130  | 979.3409  |
| 988.1483  | 997.8099  | 1006.8000 |
| 1016.7670 | 1035.1240 | 1041.1344 |
| 1060.7000 | 1079.4342 | 1098.5970 |
| 1106.6309 | 1116.7427 | 1135.2021 |
| 1158.3519 | 1165.0827 | 1194.4618 |
| 1200.4923 | 1209.6814 | 1226.8356 |
| 1244.4058 | 1252.2152 | 1255.2802 |
| 1258.2743 | 1282.3686 | 1308.3698 |
| 1332.3765 | 1337.9030 | 1355.0644 |
| 1362.4327 | 1371.0084 | 1384.4368 |
| 1397.9724 | 1403.1259 | 1418.5023 |
| 1419.8666 | 1435.5355 | 1477.4706 |
| 1482.4256 | 1485.9279 | 1488.2413 |
| 1492.1464 | 1494.6206 | 1495.7781 |
| 1498.9235 | 1507.3436 | 1508.8155 |
| 1510.8054 | 1592.5589 | 1730.4368 |
| 3004.5753 | 3007.0571 | 3011.6754 |
| 3016.7219 | 3018.4612 | 3021.7853 |
| 3027.9433 | 3037.5282 | 3042.7432 |
| 3051.2812 | 3053.2715 | 3062.5965 |
| 3064.3223 | 3064.8628 | 3065.7483 |
| 3076.9259 | 3078.9804 | 3086.7695 |
| 3087.9642 | 3112.0026 | 3112.3951 |
| 3127.1903 | 3155.5671 | 3242.4637 |

Zero-point correction (Hartree): 0.362719

**TS4: MPW1B95/6-31+G\*\* at T = 300 K**

Scan-267-external-B

-----  
E(RmPW+HF-B95/6-31+G(d,p)) (Hartree): -811.051715434

Electronic state : 1-A

Cartesian coordinates (Angs):

|   |           |           |           |
|---|-----------|-----------|-----------|
| C | 0.209680  | 0.388577  | 0.418651  |
| C | -0.925567 | 1.095677  | -0.398607 |
| C | 0.989282  | 1.717780  | 0.375062  |
| C | -0.296462 | 2.468107  | -0.012835 |
| C | -0.940452 | 3.107852  | 1.208936  |
| C | -0.186563 | 3.473203  | -1.142042 |
| C | 0.906989  | -0.834959 | -0.114997 |
| C | 0.645137  | -2.198455 | 0.474767  |
| C | -0.311083 | -3.030872 | -0.401311 |
| C | 1.606000  | -0.763286 | -1.309836 |
| C | -1.407612 | -2.139954 | -0.901627 |
| C | -2.337321 | -1.561058 | -0.136812 |
| C | -3.057808 | -0.351396 | -0.646924 |
| C | -2.403488 | 0.916322  | -0.084520 |
| C | -2.574067 | -1.925350 | 1.297176  |
| H | -0.138501 | 0.183367  | 1.434783  |
| H | -0.749970 | 0.910752  | -1.466353 |
| H | 1.728667  | 1.735652  | -0.429169 |
| H | 1.487245  | 2.014683  | 1.299087  |
| H | -0.339231 | 3.958150  | 1.539355  |
| H | -1.008649 | 2.409239  | 2.046131  |
| H | -1.946840 | 3.474466  | 0.993578  |

|                                                       |           |           |           |
|-------------------------------------------------------|-----------|-----------|-----------|
| H                                                     | 0.384745  | 4.352294  | -0.832463 |
| H                                                     | -1.175481 | 3.815879  | -1.459833 |
| H                                                     | 0.312914  | 3.037023  | -2.010272 |
| H                                                     | 0.213118  | -2.070826 | 1.469291  |
| H                                                     | 1.599713  | -2.714017 | 0.603664  |
| H                                                     | -0.687905 | -3.877074 | 0.179482  |
| H                                                     | 0.237476  | -3.453664 | -1.244878 |
| H                                                     | 1.916219  | -1.669941 | -1.810674 |
| H                                                     | 1.603581  | 0.141059  | -1.904632 |
| H                                                     | -1.315291 | -1.788123 | -1.926235 |
| H                                                     | -4.115948 | -0.362586 | -0.366818 |
| H                                                     | -3.008110 | -0.326238 | -1.739038 |
| H                                                     | -2.935521 | 1.787439  | -0.483799 |
| H                                                     | -2.548790 | 0.952224  | 0.999728  |
| H                                                     | -2.182172 | -1.158017 | 1.973228  |
| H                                                     | -2.106420 | -2.871472 | 1.567721  |
| H                                                     | -3.645216 | -2.004858 | 1.499903  |
| O                                                     | 3.496445  | 0.065348  | 0.466254  |
| O                                                     | 3.622703  | -0.517300 | -0.678083 |
| O                                                     | 2.745900  | -0.629114 | 1.251546  |
| Rotational constants (GHz):                           | 0.4806300 | 0.4114000 | 0.2642800 |
| Vibrational harmonic frequencies (cm <sup>-1</sup> ): |           |           |           |
| -297.9492                                             | 53.8704   | 71.8342   |           |
| 87.7190                                               | 89.3176   | 131.2637  |           |
| 146.3265                                              | 163.8146  | 183.9004  |           |
| 206.2358                                              | 213.4689  | 223.4448  |           |
| 233.9195                                              | 255.3440  | 262.1550  |           |
| 284.3228                                              | 310.2893  | 316.9249  |           |
| 327.0511                                              | 336.3571  | 360.1139  |           |
| 396.0777                                              | 403.7172  | 440.5406  |           |
| 449.4328                                              | 485.9761  | 504.3051  |           |
| 515.1661                                              | 551.9190  | 572.5771  |           |
| 590.3196                                              | 642.3074  | 758.4579  |           |
| 760.5956                                              | 767.0456  | 806.2849  |           |
| 818.5017                                              | 831.1297  | 874.6992  |           |
| 889.4323                                              | 895.9708  | 925.6017  |           |
| 935.5127                                              | 948.6253  | 960.7727  |           |
| 964.5698                                              | 986.9867  | 1004.4418 |           |
| 1011.9032                                             | 1015.0017 | 1022.1587 |           |
| 1031.8828                                             | 1047.7174 | 1056.2727 |           |
| 1065.1246                                             | 1097.6212 | 1127.2201 |           |
| 1128.7242                                             | 1152.7642 | 1160.7401 |           |
| 1164.9580                                             | 1175.1165 | 1195.1581 |           |
| 1214.7360                                             | 1232.2419 | 1247.3640 |           |
| 1248.5549                                             | 1256.9819 | 1262.7790 |           |
| 1273.2574                                             | 1316.7375 | 1330.0975 |           |
| 1340.9835                                             | 1344.4891 | 1357.2244 |           |
| 1371.0871                                             | 1376.1211 | 1396.0476 |           |
| 1403.5941                                             | 1413.9459 | 1428.6081 |           |
| 1430.5964                                             | 1436.5822 | 1474.6217 |           |
| 1479.0791                                             | 1489.6872 | 1491.3496 |           |
| 1496.3137                                             | 1497.7291 | 1501.2931 |           |
| 1506.7388                                             | 1511.2131 | 1517.2705 |           |
| 1520.8284                                             | 1582.1972 | 1770.2390 |           |
| 3047.2333                                             | 3053.4886 | 3057.6477 |           |
| 3060.4685                                             | 3066.2158 | 3067.8144 |           |
| 3084.8870                                             | 3095.2418 | 3096.7351 |           |
| 3100.4464                                             | 3100.9661 | 3120.7931 |           |
| 3122.7602                                             | 3130.4229 | 3135.6140 |           |
| 3142.4486                                             | 3146.6692 | 3149.2386 |           |
| 3152.6528                                             | 3159.8616 | 3169.8168 |           |

3179.4518                      3205.2527                      3302.4057  
 Zero-point correction (Hartree): 0.368745

**B3LYP-Optimization**

-----  
 E(RB+HF-LYP/6-311G(d,p)) (Hartree): -811.619250275

Electronic state : 1-A

Cartesian coordinates (Angs):

|   |           |           |           |
|---|-----------|-----------|-----------|
| C | 0.256628  | 0.408557  | 0.364931  |
| C | -0.933806 | 1.147484  | -0.383140 |
| C | 1.045913  | 1.746159  | 0.319631  |
| C | -0.254195 | 2.523987  | -0.023951 |
| C | -0.835879 | 3.212531  | 1.216696  |
| C | -0.156797 | 3.516024  | -1.181689 |
| C | 0.912257  | -0.832746 | -0.210776 |
| C | 0.600237  | -2.201110 | 0.377123  |
| C | -0.442696 | -3.004416 | -0.453946 |
| C | -1.538067 | -2.071751 | -0.895152 |
| C | -2.489213 | -1.536963 | -0.123868 |
| C | -3.147907 | -0.254073 | -0.568231 |
| C | -2.405204 | 0.972947  | 0.017778  |
| C | -2.836033 | -2.023374 | 1.259936  |
| H | -0.046711 | 0.193752  | 1.392269  |
| H | -0.827759 | 0.978382  | -1.460765 |
| H | 1.771653  | 1.780529  | -0.495733 |
| H | 1.560114  | 2.020248  | 1.242650  |
| H | -0.188721 | 4.043600  | 1.514727  |
| H | -0.909042 | 2.533035  | 2.070103  |
| H | -1.832597 | 3.621564  | 1.027116  |
| H | 0.455798  | 4.381878  | -0.908096 |
| H | -1.146462 | 3.889012  | -1.467799 |
| H | 0.294218  | 3.053189  | -2.064501 |
| H | 0.218245  | -2.069116 | 1.392246  |
| H | 1.532911  | -2.765076 | 0.460483  |
| H | -0.810275 | -3.838118 | 0.151337  |
| H | 0.046112  | -3.444317 | -1.327561 |
| H | -1.398405 | -1.633264 | -1.880778 |
| H | -4.197015 | -0.210799 | -0.252510 |
| H | -3.137570 | -0.187872 | -1.660958 |
| H | -2.943338 | 1.872246  | -0.307378 |
| H | -2.487750 | 0.958197  | 1.109704  |
| H | -2.614249 | -1.268728 | 2.023323  |
| H | -2.307301 | -2.937893 | 1.530628  |
| H | -3.911193 | -2.225485 | 1.327969  |
| C | 1.666890  | -0.774911 | -1.353717 |
| H | 1.810997  | 0.146214  | -1.903171 |
| H | 1.988062  | -1.682356 | -1.846810 |
| O | 3.816924  | -0.731858 | -0.585669 |
| O | 3.640727  | -0.097129 | 0.517807  |
| O | 2.845788  | -0.693372 | 1.338332  |

Rotational constants (GHz):    0.4680700    0.3815900    0.2483800

Vibrational harmonic frequencies (cm-1):

|          |          |          |
|----------|----------|----------|
| -90.7349 | 44.0461  | 45.8379  |
| 61.7439  | 68.2501  | 101.6938 |
| 119.2086 | 150.3231 | 157.8306 |
| 168.4078 | 172.1460 | 217.5789 |
| 224.5104 | 241.6871 | 246.2537 |
| 273.8786 | 291.7374 | 303.0961 |
| 307.3698 | 333.8487 | 358.0295 |

|           |           |           |
|-----------|-----------|-----------|
| 396.1997  | 401.4191  | 421.1744  |
| 437.7191  | 452.5290  | 487.6543  |
| 505.5617  | 550.9517  | 564.7270  |
| 589.4812  | 638.1915  | 738.1652  |
| 742.2095  | 749.5330  | 760.6410  |
| 811.2150  | 822.9165  | 849.0728  |
| 872.2086  | 891.8072  | 902.4973  |
| 917.0324  | 931.7335  | 940.0772  |
| 952.4246  | 964.7680  | 978.4154  |
| 990.9526  | 998.3596  | 1006.2272 |
| 1016.6704 | 1032.5996 | 1040.7947 |
| 1060.7021 | 1076.6507 | 1094.5223 |
| 1098.1228 | 1112.3866 | 1134.7678 |
| 1158.1420 | 1162.8659 | 1191.6657 |
| 1199.5181 | 1207.1286 | 1226.3450 |
| 1242.5375 | 1251.7698 | 1254.2571 |
| 1258.6032 | 1278.6205 | 1309.3707 |
| 1328.2575 | 1334.7593 | 1354.6416 |
| 1361.2599 | 1373.6940 | 1386.3722 |
| 1398.1554 | 1403.8573 | 1420.5781 |
| 1421.9360 | 1432.0190 | 1477.4979 |
| 1482.5349 | 1486.3519 | 1487.1678 |
| 1491.7119 | 1495.2575 | 1496.4122 |
| 1497.8305 | 1505.1641 | 1507.5565 |
| 1511.2185 | 1581.0805 | 1729.5377 |
| 3004.1462 | 3008.9183 | 3011.9658 |
| 3017.1141 | 3019.9828 | 3023.2081 |
| 3035.1764 | 3042.6228 | 3045.5331 |
| 3052.0137 | 3056.0350 | 3057.6614 |
| 3062.5527 | 3067.0791 | 3067.4233 |
| 3077.9778 | 3079.1923 | 3089.3952 |
| 3091.3775 | 3104.6437 | 3112.5998 |
| 3124.0493 | 3156.3962 | 3242.1890 |

Zero-point correction (Hartree): 0.362628

**TS5: B3LYP**

-----  
E(RB+HF-LYP/6-311G(d,p)) (Hartree): -811.680352037

Electronic state : 1-A

Cartesian coordinates (Angs):

|   |           |           |           |
|---|-----------|-----------|-----------|
| C | -1.460551 | 0.867211  | 0.516170  |
| C | -1.378827 | -0.492151 | -0.304366 |
| C | -2.973107 | 0.906400  | 0.175184  |
| C | -2.945299 | -0.605186 | -0.178305 |
| C | -3.423608 | -1.461965 | 1.000947  |
| C | -3.670759 | -1.016548 | -1.457955 |
| C | -0.599486 | 2.082742  | 0.210845  |
| C | 0.699858  | 2.268627  | 0.995717  |
| C | 1.983760  | 1.882465  | 0.219409  |
| C | -0.957451 | 3.007869  | -0.683531 |
| C | 1.807803  | 0.633006  | -0.647214 |
| C | 0.914049  | -1.861050 | -0.274096 |
| C | -0.570640 | -1.728036 | 0.124349  |
| C | 1.687914  | -0.772546 | 1.948647  |
| H | -1.346553 | 0.630916  | 1.579890  |
| H | -1.149369 | -0.247802 | -1.347397 |
| H | -3.182857 | 1.513329  | -0.706591 |
| H | -3.644359 | 1.220916  | 0.978140  |
| H | -4.499870 | -1.322763 | 1.143027  |
| H | -2.933170 | -1.189730 | 1.939667  |

|                                          |           |           |           |
|------------------------------------------|-----------|-----------|-----------|
| H                                        | -3.250787 | -2.528221 | 0.828469  |
| H                                        | -4.756038 | -0.926356 | -1.341083 |
| H                                        | -3.454109 | -2.058239 | -1.719626 |
| H                                        | -3.371048 | -0.390143 | -2.302882 |
| H                                        | 0.640390  | 1.709346  | 1.930745  |
| H                                        | 0.786142  | 3.319616  | 1.284448  |
| H                                        | 2.839798  | 1.782073  | 0.893070  |
| H                                        | 2.233675  | 2.689964  | -0.475343 |
| H                                        | -0.335852 | 3.878832  | -0.864555 |
| H                                        | -1.864649 | 2.941024  | -1.270480 |
| H                                        | 0.765535  | 0.475670  | -0.944234 |
| H                                        | 1.236735  | -2.885460 | -0.039807 |
| H                                        | 1.049769  | -1.739171 | -1.348402 |
| H                                        | -1.070595 | -2.587777 | -0.337732 |
| H                                        | -0.678115 | -1.883474 | 1.202103  |
| H                                        | 0.706405  | -0.370129 | 2.180524  |
| H                                        | 2.453514  | -0.118927 | 2.366474  |
| H                                        | 1.767979  | -1.749356 | 2.437976  |
| C                                        | 1.885448  | -0.948209 | 0.460141  |
| O                                        | 3.209837  | -1.164144 | 0.257652  |
| O                                        | 3.511243  | -1.318654 | -1.019416 |
| O                                        | 2.661769  | 0.390308  | -1.575993 |
| Rotational constants (GHz):              | 0.6340700 | 0.3153100 | 0.2588400 |
| Vibrational harmonic frequencies (cm-1): |           |           |           |
| -461.0779                                | 49.4684   | 62.1218   |           |
| 79.5254                                  | 115.3087  | 134.5076  |           |
| 158.8789                                 | 183.2341  | 189.7705  |           |
| 220.9635                                 | 228.8037  | 231.4702  |           |
| 246.9996                                 | 262.3354  | 272.4950  |           |
| 295.9105                                 | 302.7246  | 314.2869  |           |
| 341.9331                                 | 363.5099  | 366.2986  |           |
| 407.9922                                 | 408.6548  | 428.7084  |           |
| 460.9430                                 | 492.6650  | 498.4609  |           |
| 518.2039                                 | 554.4719  | 572.6531  |           |
| 594.8234                                 | 629.0023  | 666.8058  |           |
| 721.1044                                 | 731.2256  | 751.1341  |           |
| 807.3101                                 | 827.7716  | 836.0750  |           |
| 863.6797                                 | 899.5346  | 919.6197  |           |
| 926.4774                                 | 941.4054  | 951.1424  |           |
| 954.8652                                 | 982.8463  | 987.4454  |           |
| 992.3461                                 | 1004.4672 | 1008.8983 |           |
| 1014.0086                                | 1018.5398 | 1048.3177 |           |
| 1054.0002                                | 1085.7636 | 1105.9753 |           |
| 1130.0442                                | 1143.6223 | 1162.0979 |           |
| 1170.0229                                | 1192.2763 | 1207.4478 |           |
| 1215.5314                                | 1229.7954 | 1244.1847 |           |
| 1255.2550                                | 1268.7877 | 1278.8822 |           |
| 1284.0709                                | 1288.6537 | 1317.6903 |           |
| 1334.1066                                | 1345.6153 | 1349.1846 |           |
| 1356.7133                                | 1380.1815 | 1381.4243 |           |
| 1398.8136                                | 1404.9287 | 1412.6258 |           |
| 1420.9604                                | 1446.6260 | 1451.0777 |           |
| 1474.3295                                | 1478.5617 | 1485.6985 |           |
| 1487.4514                                | 1488.3153 | 1495.2722 |           |
| 1499.1246                                | 1499.3392 | 1508.1683 |           |
| 1509.8403                                | 1511.9754 | 1692.0224 |           |
| 2998.8457                                | 3009.8192 | 3014.6142 |           |
| 3017.6351                                | 3023.0874 | 3028.5310 |           |
| 3032.5299                                | 3035.3854 | 3037.1308 |           |
| 3051.0060                                | 3052.1806 | 3056.6361 |           |
| 3067.3942                                | 3069.6391 | 3079.6407 |           |



|           |           |           |
|-----------|-----------|-----------|
| 3081.7179 | 3086.5380 | 3093.5867 |
| 3106.0315 | 3111.8497 | 3112.3644 |
| 3137.0335 | 3169.2817 | 3216.2616 |

Zero-point correction (Hartree): 0.364455

TS5: MPW1B95

-----  
E(RmPW+HF-B95/6-31+G(d,p)) (Hartree): -811.119785526

Electronic state : 1-A

Cartesian coordinates (Angs):

|   |           |           |           |
|---|-----------|-----------|-----------|
| C | -1.410105 | 0.865548  | 0.501724  |
| C | -1.364217 | -0.467530 | -0.332137 |
| C | -2.912035 | 0.929973  | 0.174668  |
| C | -2.907944 | -0.570460 | -0.160067 |
| C | -3.327851 | -1.403962 | 1.042825  |
| C | -3.673845 | -1.001783 | -1.394881 |
| C | -0.543833 | 2.064967  | 0.192208  |
| C | 0.737943  | 2.266597  | 0.980379  |
| C | 2.008589  | 1.838205  | 0.225969  |
| C | -0.879504 | 2.961166  | -0.738488 |
| C | 1.785281  | 0.611482  | -0.638300 |
| C | 0.897643  | -1.842194 | -0.332670 |
| C | -0.579593 | -1.721776 | 0.042092  |
| C | 1.530050  | -0.748175 | 1.915277  |
| H | -1.294611 | 0.619475  | 1.562980  |
| H | -1.163351 | -0.199512 | -1.376521 |
| H | -3.109401 | 1.525396  | -0.716832 |
| H | -3.575047 | 1.269095  | 0.973074  |
| H | -4.395323 | -1.268466 | 1.231187  |
| H | -2.793700 | -1.113537 | 1.950758  |
| H | -3.153452 | -2.469858 | 0.877387  |
| H | -4.752391 | -0.919007 | -1.237525 |
| H | -3.457317 | -2.043691 | -1.648091 |
| H | -3.410157 | -0.385145 | -2.256715 |
| H | 0.662352  | 1.748261  | 1.936152  |
| H | 0.832937  | 3.325853  | 1.226898  |
| H | 2.853153  | 1.698545  | 0.905388  |
| H | 2.297648  | 2.635450  | -0.462818 |
| H | -0.248103 | 3.820571  | -0.933417 |
| H | -1.773358 | 2.875549  | -1.341638 |
| H | 0.730820  | 0.463917  | -0.899596 |
| H | 1.228761  | -2.869145 | -0.133805 |
| H | 1.060864  | -1.669853 | -1.396747 |
| H | -1.087108 | -2.548514 | -0.467344 |
| H | -0.709001 | -1.924678 | 1.109260  |
| H | 0.535659  | -0.342088 | 2.065437  |
| H | 2.265158  | -0.086683 | 2.371003  |
| H | 1.572018  | -1.715202 | 2.423931  |
| C | 1.819088  | -0.948520 | 0.458787  |
| O | 3.138633  | -1.142306 | 0.318769  |
| O | 3.481358  | -1.358385 | -0.922086 |
| O | 2.605629  | 0.322195  | -1.570025 |

Rotational constants (GHz): 0.6492300 0.3261300 0.2671500

Vibrational harmonic frequencies (cm-1):

|           |          |          |
|-----------|----------|----------|
| -490.3262 | 46.8776  | 74.9632  |
| 89.0487   | 122.3702 | 154.1788 |
| 155.7588  | 190.0605 | 206.2708 |
| 221.2574  | 235.4836 | 251.6980 |
| 268.2909  | 290.5170 | 294.0553 |
| 302.0442  | 310.3662 | 322.7573 |
| 345.9629  | 374.4094 | 376.9693 |

|           |           |           |
|-----------|-----------|-----------|
| 408.0535  | 408.8815  | 432.3472  |
| 465.0696  | 495.9598  | 508.6748  |
| 526.6412  | 560.2755  | 574.7549  |
| 599.4243  | 640.8986  | 682.3942  |
| 728.8499  | 752.8960  | 771.1447  |
| 817.5754  | 841.1563  | 857.0543  |
| 880.6397  | 918.7318  | 931.4390  |
| 936.5449  | 954.4968  | 958.1250  |
| 959.2376  | 986.6379  | 999.4281  |
| 1007.7334 | 1018.0898 | 1024.9170 |
| 1028.5837 | 1038.2413 | 1064.3828 |
| 1078.1732 | 1108.2277 | 1131.7558 |
| 1143.2447 | 1166.8093 | 1173.1606 |
| 1206.1760 | 1216.3115 | 1224.0511 |
| 1230.9995 | 1234.2778 | 1255.6902 |
| 1268.7093 | 1279.6328 | 1307.0366 |
| 1314.1564 | 1317.9807 | 1333.2202 |
| 1337.0838 | 1348.0176 | 1353.9557 |
| 1388.9991 | 1392.1740 | 1409.3855 |
| 1413.2016 | 1421.0773 | 1421.6239 |
| 1423.3917 | 1459.4561 | 1472.9207 |
| 1483.8922 | 1488.3443 | 1489.3945 |
| 1494.2763 | 1499.1753 | 1503.9329 |
| 1510.6199 | 1513.0784 | 1514.0961 |
| 1518.2655 | 1520.0383 | 1731.4130 |
| 3052.8243 | 3056.5829 | 3058.8669 |
| 3065.9279 | 3066.3504 | 3069.4460 |
| 3072.9529 | 3087.4103 | 3089.6925 |
| 3100.9279 | 3106.4051 | 3109.8764 |
| 3134.9270 | 3135.0115 | 3146.3603 |
| 3147.1326 | 3148.4451 | 3154.9915 |
| 3162.0274 | 3163.1674 | 3177.0642 |
| 3193.9283 | 3234.7734 | 3283.3091 |

Zero-point correction (Hartree): 0.370267

**TS6: B3LYP**

-----

E(RB+HF-LYP/6-311G(d,p)) (Hartree): -811.679929287

Electronic state : 1-A

Cartesian coordinates (Angs):

|   |           |           |           |
|---|-----------|-----------|-----------|
| C | 1.780841  | 0.982181  | -0.469554 |
| C | 1.408785  | -0.453207 | 0.030713  |
| C | 3.103474  | 0.864635  | 0.320462  |
| C | 2.942109  | -0.687391 | 0.314333  |
| C | 3.701054  | -1.327345 | -0.853233 |
| C | 3.268136  | -1.410907 | 1.618730  |
| C | 0.804751  | 2.104796  | -0.270293 |
| C | -0.436665 | 2.036826  | -1.152794 |
| C | -1.769743 | 1.836482  | -0.412486 |
| C | 0.997302  | 3.110207  | 0.584753  |
| C | -1.895976 | 0.598532  | 0.446990  |
| C | -0.730050 | -1.935864 | -0.212525 |
| C | 0.587619  | -1.428355 | -0.832260 |
| C | -2.525857 | -0.866605 | -1.821291 |
| H | 1.999265  | 0.916330  | -1.543140 |
| H | 0.936038  | -0.347704 | 1.012908  |
| H | 3.011681  | 1.261392  | 1.334422  |
| H | 4.002143  | 1.280451  | -0.141254 |
| H | 4.779471  | -1.243189 | -0.685964 |

|                                          |           |           |           |
|------------------------------------------|-----------|-----------|-----------|
| H                                        | 3.477504  | -0.848578 | -1.810517 |
| H                                        | 3.467988  | -2.391922 | -0.950568 |
| H                                        | 4.344389  | -1.391584 | 1.821163  |
| H                                        | 2.959981  | -2.461217 | 1.575085  |
| H                                        | 2.758836  | -0.947389 | 2.468419  |
| H                                        | -0.306904 | 1.251017  | -1.899734 |
| H                                        | -0.524934 | 2.970632  | -1.716671 |
| H                                        | -2.593111 | 1.851857  | -1.131741 |
| H                                        | -1.928596 | 2.693112  | 0.252327  |
| H                                        | 0.275762  | 3.914567  | 0.690023  |
| H                                        | 1.882924  | 3.175717  | 1.205063  |
| H                                        | -1.063539 | 0.312959  | 1.083579  |
| H                                        | -0.938452 | -2.929640 | -0.626268 |
| H                                        | -0.605200 | -2.091870 | 0.863042  |
| H                                        | 1.202168  | -2.314053 | -1.021687 |
| H                                        | 0.406094  | -1.000334 | -1.823988 |
| H                                        | -1.800510 | -0.275080 | -2.381289 |
| H                                        | -3.482848 | -0.344875 | -1.794806 |
| H                                        | -2.673892 | -1.809884 | -2.355957 |
| C                                        | -2.080654 | -1.195265 | -0.387659 |
| O                                        | -3.011157 | -1.712250 | 0.339999  |
| O                                        | -3.226531 | -0.467641 | 1.844265  |
| O                                        | -3.076940 | 0.604512  | 1.085016  |
| Rotational constants (GHz):              | 0.6100400 | 0.3006500 | 0.2511100 |
| Vibrational harmonic frequencies (cm-1): |           |           |           |
| -474.8813                                | 42.2152   |           | 60.4113   |
| 81.6471                                  | 88.7119   |           | 131.4280  |
| 152.5918                                 | 179.2050  |           | 201.1144  |
| 214.5677                                 | 226.0120  |           | 231.7568  |
| 247.9269                                 | 251.8921  |           | 268.2106  |
| 274.1552                                 | 288.9092  |           | 318.7056  |
| 327.6415                                 | 348.7818  |           | 354.6463  |
| 390.3089                                 | 406.6442  |           | 438.9157  |
| 468.0686                                 | 476.2450  |           | 500.3416  |
| 522.7829                                 | 543.4183  |           | 555.1368  |
| 572.2201                                 | 615.2346  |           | 628.9647  |
| 711.8910                                 | 728.7862  |           | 746.9541  |
| 801.8083                                 | 823.3640  |           | 835.7070  |
| 869.1986                                 | 893.2159  |           | 902.2282  |
| 925.9006                                 | 928.1156  |           | 950.9602  |
| 957.5358                                 | 985.2868  |           | 993.5082  |
| 1007.0614                                | 1011.1397 |           | 1016.4593 |
| 1028.7944                                | 1044.6702 |           | 1061.1438 |
| 1074.3397                                | 1104.8662 |           | 1112.3327 |
| 1119.0829                                | 1128.6004 |           | 1157.3380 |
| 1174.5082                                | 1196.8649 |           | 1200.4045 |
| 1217.8370                                | 1226.2078 |           | 1230.2886 |
| 1253.3389                                | 1256.8997 |           | 1276.3518 |
| 1281.7089                                | 1294.8357 |           | 1307.6456 |
| 1330.5688                                | 1344.0147 |           | 1355.2651 |
| 1378.8158                                | 1384.7276 |           | 1388.4037 |
| 1394.3622                                | 1397.9146 |           | 1407.8093 |
| 1412.9187                                | 1421.6428 |           | 1449.3521 |
| 1470.5377                                | 1475.7759 |           | 1483.0262 |
| 1483.6266                                | 1487.0292 |           | 1491.4559 |
| 1496.3323                                | 1498.4012 |           | 1505.4403 |
| 1509.1944                                | 1510.2292 |           | 1703.6392 |
| 3000.3928                                | 3010.3533 |           | 3015.1114 |
| 3020.3395                                | 3023.2942 |           | 3027.3164 |
| 3029.1263                                | 3036.2383 |           | 3041.5664 |
| 3044.1977                                | 3051.0465 |           | 3067.7949 |

|           |           |           |
|-----------|-----------|-----------|
| 3069.2752 | 3070.4392 | 3078.7514 |
| 3080.4998 | 3086.6895 | 3088.5231 |
| 3094.2132 | 3100.8229 | 3131.0180 |
| 3132.2652 | 3147.6777 | 3212.1434 |

Zero-point correction (Hartree): 0.363791

TS6: MPW1B95

-----  
E(RmPW+HF-B95/6-31+G(d,p)) (Hartree): -811.115515481

Electronic state : 1-A

Cartesian coordinates (Angs):

|   |           |           |           |
|---|-----------|-----------|-----------|
| C | 1.763515  | 0.993910  | -0.447383 |
| C | 1.407691  | -0.431056 | 0.041489  |
| C | 3.054939  | 0.891268  | 0.366961  |
| C | 2.928207  | -0.648303 | 0.307431  |
| C | 3.674163  | -1.223173 | -0.887717 |
| C | 3.277651  | -1.414823 | 1.567134  |
| C | 0.755603  | 2.075814  | -0.264344 |
| C | -0.437032 | 1.969489  | -1.189796 |
| C | -1.778177 | 1.789723  | -0.489516 |
| C | 0.870308  | 3.053599  | 0.634066  |
| C | -1.878139 | 0.595718  | 0.413558  |
| C | -0.698571 | -1.921135 | -0.180517 |
| C | 0.595797  | -1.404287 | -0.811537 |
| C | -2.495866 | -0.900692 | -1.791654 |
| H | 2.004285  | 0.929671  | -1.515612 |
| H | 0.947685  | -0.329126 | 1.031298  |
| H | 2.911499  | 1.246814  | 1.390111  |
| H | 3.956607  | 1.346990  | -0.046096 |
| H | 4.751182  | -1.107848 | -0.744916 |
| H | 3.408284  | -0.725703 | -1.822965 |
| H | 3.473253  | -2.290090 | -1.009628 |
| H | 4.354453  | -1.393236 | 1.754228  |
| H | 2.978144  | -2.463163 | 1.483909  |
| H | 2.775586  | -0.989767 | 2.438794  |
| H | -0.272681 | 1.146957  | -1.887181 |
| H | -0.504685 | 2.871272  | -1.803385 |
| H | -2.583638 | 1.750880  | -1.225752 |
| H | -1.970823 | 2.670187  | 0.131284  |
| H | 0.110365  | 3.819876  | 0.740795  |
| H | 1.730154  | 3.128736  | 1.287320  |
| H | -1.028290 | 0.320130  | 1.031961  |
| H | -0.891318 | -2.928153 | -0.563931 |
| H | -0.568684 | -2.043857 | 0.898109  |
| H | 1.220621  | -2.279884 | -1.008740 |
| H | 0.402098  | -0.976419 | -1.800587 |
| H | -1.777968 | -0.303040 | -2.351975 |
| H | -3.457177 | -0.389441 | -1.766455 |
| H | -2.631450 | -1.845443 | -2.322864 |
| C | -2.050631 | -1.219461 | -0.369715 |
| O | -2.964788 | -1.716456 | 0.373630  |
| O | -3.156539 | -0.429841 | 1.855826  |
| O | -3.037955 | 0.595561  | 1.056984  |

Rotational constants (GHz): 0.6243600 0.3068400 0.2576100

Vibrational harmonic frequencies (cm-1):

|           |          |          |
|-----------|----------|----------|
| -504.2340 | 55.7892  | 70.7270  |
| 93.2754   | 100.9163 | 130.3988 |
| 154.7456  | 186.7401 | 198.7686 |
| 227.9023  | 233.9465 | 252.5845 |
| 259.1148  | 264.2677 | 276.1693 |

|           |           |           |
|-----------|-----------|-----------|
| 301.1689  | 307.1233  | 319.0880  |
| 332.2248  | 354.5403  | 357.8554  |
| 389.3198  | 405.2687  | 447.2089  |
| 472.1484  | 480.0781  | 502.2408  |
| 523.1207  | 544.7358  | 558.2953  |
| 577.2581  | 618.1855  | 630.3649  |
| 731.1537  | 731.6846  | 767.2923  |
| 807.8642  | 829.5923  | 854.8624  |
| 884.7089  | 901.7471  | 924.0467  |
| 934.8563  | 949.6728  | 961.1470  |
| 969.3523  | 998.0148  | 1011.4958 |
| 1017.6173 | 1023.3853 | 1037.8093 |
| 1053.9264 | 1067.2919 | 1077.9469 |
| 1100.2081 | 1134.3487 | 1138.3817 |
| 1148.7663 | 1176.1532 | 1178.9722 |
| 1198.2533 | 1216.1314 | 1224.5787 |
| 1234.3075 | 1244.5869 | 1254.9716 |
| 1263.2945 | 1267.4518 | 1290.5935 |
| 1306.9513 | 1310.9967 | 1325.1712 |
| 1344.9666 | 1346.5458 | 1367.1571 |
| 1390.5749 | 1399.6007 | 1407.5738 |
| 1415.3613 | 1426.7015 | 1432.7501 |
| 1439.6602 | 1453.8765 | 1463.3201 |
| 1467.3010 | 1471.7884 | 1480.0587 |
| 1486.7861 | 1491.8975 | 1494.5184 |
| 1502.8459 | 1505.7593 | 1512.2330 |
| 1522.9881 | 1527.3045 | 1746.5106 |
| 3048.4639 | 3059.8750 | 3062.6816 |
| 3065.6417 | 3070.1065 | 3073.4498 |
| 3080.5792 | 3086.1877 | 3091.2669 |
| 3094.1041 | 3104.9761 | 3122.4188 |
| 3132.5285 | 3137.7706 | 3145.3826 |
| 3146.6715 | 3147.0988 | 3150.5114 |
| 3152.4871 | 3167.0388 | 3187.1978 |
| 3197.1044 | 3206.3249 | 3275.2625 |

Zero-point correction (Hartree): 0.369697

**TS7:** B3LYP

-----

E(RB+HF-LYP/6-311G(d,p)) (Hartree): -811.680376076

Electronic state : 1-A

Cartesian coordinates (Angs):

|   |           |           |           |
|---|-----------|-----------|-----------|
| C | -1.813360 | 0.962750  | 0.476044  |
| C | -1.433704 | -0.469172 | -0.025848 |
| C | -3.143797 | 0.829387  | -0.299468 |
| C | -2.966139 | -0.720859 | -0.295335 |
| C | -3.707906 | -1.368462 | 0.879213  |
| C | -3.296711 | -1.447821 | -1.596786 |
| C | -0.850137 | 2.094941  | 0.263297  |
| C | 0.418328  | 2.019855  | 1.106738  |
| C | 1.733370  | 1.867292  | 0.324379  |
| C | -1.082336 | 3.110640  | -0.569047 |
| C | 1.870955  | 0.702300  | -0.669084 |
| C | 0.715684  | -1.929537 | 0.208663  |
| C | -0.600534 | -1.431911 | 0.837172  |
| C | 2.555763  | -0.747232 | 1.617551  |
| H | -2.019502 | 0.897202  | 1.552451  |
| H | -0.962882 | -0.360859 | -1.007657 |
| H | -3.066277 | 1.228077  | -1.313736 |
| H | -4.042499 | 1.234182  | 0.171669  |

|                                          |           |           |           |
|------------------------------------------|-----------|-----------|-----------|
| H                                        | -4.788477 | -1.297412 | 0.720593  |
| H                                        | -3.483035 | -0.884724 | 1.833718  |
| H                                        | -3.462793 | -2.430641 | 0.976622  |
| H                                        | -4.374441 | -1.435291 | -1.791460 |
| H                                        | -2.982757 | -2.496773 | -1.554819 |
| H                                        | -2.796672 | -0.981636 | -2.450382 |
| H                                        | 0.313057  | 1.209520  | 1.832356  |
| H                                        | 0.499328  | 2.935497  | 1.702208  |
| H                                        | 2.581298  | 1.845113  | 1.013392  |
| H                                        | 1.877056  | 2.763058  | -0.287831 |
| H                                        | -0.371224 | 3.921831  | -0.688427 |
| H                                        | -1.988826 | 3.174960  | -1.158901 |
| H                                        | 0.961332  | 0.454537  | -1.234909 |
| H                                        | 0.998017  | -2.861892 | 0.714928  |
| H                                        | 0.542488  | -2.193259 | -0.838387 |
| H                                        | -1.196199 | -2.328362 | 1.033974  |
| H                                        | -0.410738 | -0.998073 | 1.824066  |
| H                                        | 1.859391  | -0.206709 | 2.254991  |
| H                                        | 3.477454  | -0.180728 | 1.519299  |
| H                                        | 2.784354  | -1.704168 | 2.101859  |
| C                                        | 1.962640  | -1.051446 | 0.259691  |
| O                                        | 2.838334  | -1.581754 | -0.635449 |
| O                                        | 3.941045  | -0.859832 | -0.754268 |
| O                                        | 2.955602  | 0.713113  | -1.363870 |
| Rotational constants (GHz):              | 0.6411000 | 0.2970300 | 0.2434000 |
| Vibrational harmonic frequencies (cm-1): |           |           |           |
| -484.0093                                | 45.7128   |           | 67.4906   |
| 88.5316                                  | 94.0825   |           | 131.4936  |
| 149.4471                                 | 177.9503  |           | 189.4260  |
| 197.3997                                 | 225.0374  |           | 240.2833  |
| 251.3591                                 | 261.4814  |           | 278.4160  |
| 286.8629                                 | 301.3138  |           | 326.4155  |
| 335.2665                                 | 343.1457  |           | 371.6788  |
| 390.3143                                 | 402.6367  |           | 408.8430  |
| 452.5031                                 | 490.9169  |           | 511.2543  |
| 534.6611                                 | 543.4161  |           | 557.7527  |
| 584.9751                                 | 625.2679  |           | 642.2591  |
| 722.6533                                 | 727.5485  |           | 765.7445  |
| 805.6044                                 | 816.6273  |           | 848.5442  |
| 853.5498                                 | 902.7245  |           | 906.1626  |
| 921.9616                                 | 938.0470  |           | 951.3311  |
| 960.0494                                 | 977.4495  |           | 993.7739  |
| 998.5141                                 | 1008.6165 |           | 1016.5071 |
| 1028.1801                                | 1035.6927 |           | 1055.3119 |
| 1069.1281                                | 1087.4211 |           | 1110.8076 |
| 1125.9663                                | 1133.5445 |           | 1162.0834 |
| 1175.6107                                | 1196.9007 |           | 1210.3380 |
| 1226.4808                                | 1237.3789 |           | 1245.8684 |
| 1248.4052                                | 1255.2864 |           | 1273.9096 |
| 1286.9708                                | 1303.4632 |           | 1304.8498 |
| 1326.7367                                | 1351.9126 |           | 1354.4432 |
| 1372.7832                                | 1388.0238 |           | 1391.3892 |
| 1399.0541                                | 1402.9821 |           | 1408.6539 |
| 1421.2818                                | 1426.5764 |           | 1448.7079 |
| 1475.0335                                | 1478.1728 |           | 1483.4522 |
| 1484.2861                                | 1485.8582 |           | 1488.4344 |
| 1496.6513                                | 1497.9298 |           | 1507.5433 |
| 1509.2127                                | 1510.8790 |           | 1704.8663 |
| 2980.2676                                | 2996.2192 |           | 3004.2390 |
| 3009.7068                                | 3019.3430 |           | 3026.7470 |

|           |           |           |
|-----------|-----------|-----------|
| 3028.6617 | 3032.0971 | 3038.4167 |
| 3041.8966 | 3046.0547 | 3056.6373 |
| 3067.0693 | 3067.3993 | 3072.9017 |
| 3077.2637 | 3081.4464 | 3084.6573 |
| 3086.2084 | 3095.7828 | 3126.1560 |
| 3132.7380 | 3172.8646 | 3211.6018 |

Zero-point correction (Hartree): 0.363978

TS7: MPW1B95

E(RmPW+HF-B95/6-31+G(d,p)) (Hartree): -811.116984139

Electronic state : 1-A

Cartesian coordinates (Angs):

|   |           |           |           |
|---|-----------|-----------|-----------|
| C | -1.805178 | 0.970540  | 0.455551  |
| C | -1.436389 | -0.450053 | -0.033603 |
| C | -3.103017 | 0.849685  | -0.347003 |
| C | -2.954884 | -0.687930 | -0.291834 |
| C | -3.687069 | -1.273699 | 0.906648  |
| C | -3.301367 | -1.456873 | -1.551031 |
| C | -0.813379 | 2.065080  | 0.257606  |
| C | 0.417348  | 1.941019  | 1.129520  |
| C | 1.735594  | 1.834918  | 0.374912  |
| C | -0.982875 | 3.065855  | -0.605683 |
| C | 1.866659  | 0.714292  | -0.647667 |
| C | 0.683880  | -1.909974 | 0.193775  |
| C | -0.616580 | -1.411066 | 0.823108  |
| C | 2.541762  | -0.761957 | 1.585659  |
| H | -2.034045 | 0.906297  | 1.526907  |
| H | -0.973295 | -0.345586 | -1.020508 |
| H | -2.971951 | 1.211020  | -1.369731 |
| H | -4.008280 | 1.290241  | 0.074343  |
| H | -4.766103 | -1.171558 | 0.769556  |
| H | -3.423104 | -0.772078 | 1.840283  |
| H | -3.473961 | -2.338627 | 1.027504  |
| H | -4.378966 | -1.445537 | -1.734132 |
| H | -2.992531 | -2.502992 | -1.470369 |
| H | -2.807116 | -1.025766 | -2.424117 |
| H | 0.289808  | 1.079149  | 1.787649  |
| H | 0.476560  | 2.808987  | 1.792293  |
| H | 2.574988  | 1.785982  | 1.070351  |
| H | 1.885034  | 2.751867  | -0.201155 |
| H | -0.236409 | 3.842280  | -0.729282 |
| H | -1.873307 | 3.145595  | -1.216370 |
| H | 0.952259  | 0.473564  | -1.208389 |
| H | 0.962786  | -2.846897 | 0.689625  |
| H | 0.505339  | -2.162224 | -0.854280 |
| H | -1.218934 | -2.303041 | 1.015061  |
| H | -0.426189 | -0.983233 | 1.812109  |
| H | 1.845898  | -0.247148 | 2.242714  |
| H | 3.450127  | -0.177252 | 1.479736  |
| H | 2.795530  | -1.722044 | 2.045971  |
| C | 1.932174  | -1.054167 | 0.245918  |
| O | 2.780051  | -1.563501 | -0.663401 |
| O | 3.895193  | -0.888013 | -0.746925 |
| O | 2.947980  | 0.718388  | -1.329802 |

Rotational constants (GHz): 0.6578100 0.3020300 0.2484500

Vibrational harmonic frequencies (cm-1):

|           |          |          |
|-----------|----------|----------|
| -516.8828 | 54.0751  | 80.3711  |
| 99.8463   | 103.8949 | 141.9134 |
| 153.3825  | 189.7464 | 197.4139 |
| 221.1709  | 240.2399 | 249.7803 |

|           |           |           |
|-----------|-----------|-----------|
| 262.8211  | 270.5686  | 286.9673  |
| 301.5524  | 322.6239  | 335.4618  |
| 349.7154  | 356.3863  | 366.2097  |
| 393.3043  | 408.3428  | 411.7166  |
| 456.8537  | 501.2755  | 514.0768  |
| 539.7431  | 551.3350  | 561.5539  |
| 588.2961  | 630.1847  | 648.4040  |
| 731.9020  | 743.9109  | 784.1071  |
| 812.8582  | 832.7334  | 869.3119  |
| 874.3218  | 908.8287  | 924.0176  |
| 931.8550  | 956.1367  | 960.7859  |
| 971.9154  | 986.4445  | 1007.9992 |
| 1012.2636 | 1021.8189 | 1027.6778 |
| 1051.3525 | 1068.3940 | 1074.0446 |
| 1099.0034 | 1110.5050 | 1140.2793 |
| 1149.1876 | 1172.1384 | 1193.9087 |
| 1204.4186 | 1217.2923 | 1230.2696 |
| 1235.6157 | 1248.4503 | 1255.1502 |
| 1260.3099 | 1279.2829 | 1297.7494 |
| 1308.5546 | 1322.3433 | 1326.9240 |
| 1345.9950 | 1358.6813 | 1371.7727 |
| 1394.9236 | 1403.3655 | 1407.3523 |
| 1411.2272 | 1416.6911 | 1427.0430 |
| 1431.2842 | 1458.3349 | 1471.9644 |
| 1477.0914 | 1483.6041 | 1487.1604 |
| 1489.4525 | 1491.2954 | 1496.2177 |
| 1502.3120 | 1506.8223 | 1513.9272 |
| 1522.1285 | 1529.5458 | 1748.2577 |
| 3040.9650 | 3045.5200 | 3055.8891 |
| 3059.3859 | 3067.5579 | 3071.4371 |
| 3077.4959 | 3080.4324 | 3084.6261 |
| 3091.6293 | 3095.2763 | 3110.9154 |
| 3126.9500 | 3133.6660 | 3135.9544 |
| 3143.5873 | 3147.8665 | 3149.3198 |
| 3150.0662 | 3152.8768 | 3187.2674 |
| 3188.3777 | 3238.2889 | 3274.4145 |

Zero-point correction (Hartree): 0.370087

**TS8:** B3LYP

-----

E(RB+HF-LYP/6-311G(d,p)) (Hartree): -811.674602768

Electronic state : 1-A

Cartesian coordinates (Angs):

|   |           |           |           |
|---|-----------|-----------|-----------|
| C | -1.452799 | 0.893633  | 0.544668  |
| C | -1.429155 | -0.451006 | -0.305557 |
| C | -2.943756 | 1.042903  | 0.149372  |
| C | -3.002890 | -0.462234 | -0.225250 |
| C | -3.567297 | -1.301072 | 0.928622  |
| C | -3.716071 | -0.811620 | -1.529691 |
| C | -0.506110 | 2.058356  | 0.316162  |
| C | 0.789630  | 2.093206  | 1.121370  |
| C | 2.043558  | 1.595850  | 0.361603  |
| C | -0.778868 | 3.059402  | -0.525161 |
| C | 1.754354  | 0.449400  | -0.577689 |
| C | 0.736129  | -2.028171 | -0.318188 |
| C | -0.714329 | -1.743235 | 0.121277  |
| C | 1.718864  | -1.010150 | 1.879741  |
| H | -1.393651 | 0.617874  | 1.603407  |
| H | -1.162135 | -0.202953 | -1.339742 |
| H | -3.077001 | 1.671003  | -0.732969 |
| H | -3.622472 | 1.394731  | 0.930326  |



|                                          |           |           |           |
|------------------------------------------|-----------|-----------|-----------|
| H                                        | -4.636104 | -1.094896 | 1.043253  |
| H                                        | -3.086267 | -1.072864 | 1.883489  |
| H                                        | -3.456960 | -2.373588 | 0.745773  |
| H                                        | -4.797128 | -0.660605 | -1.440078 |
| H                                        | -3.551991 | -1.860303 | -1.800959 |
| H                                        | -3.358110 | -0.191840 | -2.356886 |
| H                                        | 0.661479  | 1.519927  | 2.039846  |
| H                                        | 0.986419  | 3.122253  | 1.432886  |
| H                                        | 2.859567  | 1.368337  | 1.045007  |
| H                                        | 2.404841  | 2.400255  | -0.292921 |
| H                                        | -0.093257 | 3.892535  | -0.643417 |
| H                                        | -1.681419 | 3.098821  | -1.121661 |
| H                                        | 0.784031  | 0.495989  | -1.058152 |
| H                                        | 0.936415  | -3.084106 | -0.103867 |
| H                                        | 0.850509  | -1.918353 | -1.400292 |
| H                                        | -1.307672 | -2.563150 | -0.302378 |
| H                                        | -0.798884 | -1.868019 | 1.205348  |
| H                                        | 0.781324  | -0.533769 | 2.160064  |
| H                                        | 2.559557  | -0.432807 | 2.263274  |
| H                                        | 1.749630  | -1.990476 | 2.365758  |
| C                                        | 1.891504  | -1.254751 | 0.372824  |
| O                                        | 3.075598  | -1.634439 | 0.045498  |
| O                                        | 3.841215  | -0.085095 | -1.014157 |
| O                                        | 2.647272  | 0.154900  | -1.532557 |
| Rotational constants (GHz):              |           |           |           |
|                                          | 0.6530000 | 0.3073800 | 0.2553500 |
| Vibrational harmonic frequencies (cm-1): |           |           |           |
| -472.3322                                | 48.7579   |           | 61.7628   |
| 84.2773                                  | 105.2756  |           | 143.6066  |
| 157.5004                                 | 186.9597  |           | 214.2251  |
| 222.6418                                 | 226.6802  |           | 240.0078  |
| 270.5148                                 | 276.8493  |           | 287.2121  |
| 293.9661                                 | 304.2343  |           | 318.2289  |
| 326.5303                                 | 345.5073  |           | 358.8529  |
| 405.4270                                 | 413.7265  |           | 430.4661  |
| 452.7533                                 | 481.1366  |           | 516.0346  |
| 532.2314                                 | 550.4361  |           | 567.6218  |
| 580.7315                                 | 626.8404  |           | 694.3922  |
| 729.1771                                 | 733.6321  |           | 758.3999  |
| 802.3231                                 | 818.5823  |           | 841.1510  |
| 868.4000                                 | 899.6375  |           | 906.0238  |
| 933.4911                                 | 941.4951  |           | 952.3987  |
| 953.6854                                 | 974.2381  |           | 989.3357  |
| 996.1329                                 | 1005.8364 |           | 1013.9850 |
| 1021.6609                                | 1029.1728 |           | 1047.1202 |
| 1056.1470                                | 1066.4433 |           | 1096.9754 |
| 1116.5940                                | 1129.9411 |           | 1163.7006 |
| 1170.0095                                | 1180.8813 |           | 1202.7090 |
| 1210.4299                                | 1224.4299 |           | 1231.1664 |
| 1257.8299                                | 1263.0176 |           | 1265.9856 |
| 1282.7934                                | 1287.3491 |           | 1316.9197 |
| 1331.3022                                | 1337.2707 |           | 1358.0765 |
| 1367.0252                                | 1383.1064 |           | 1386.8923 |
| 1394.5226                                | 1397.9054 |           | 1405.4964 |
| 1421.5753                                | 1449.3830 |           | 1458.5447 |
| 1473.4861                                | 1477.9660 |           | 1485.2449 |
| 1486.0378                                | 1488.0907 |           | 1494.1386 |
| 1498.1339                                | 1504.8881 |           | 1508.5626 |
| 1510.0096                                | 1514.0390 |           | 1693.8938 |
| 3006.2015                                | 3007.9727 |           | 3010.0727 |
| 3010.6480                                | 3022.9396 |           | 3027.4343 |
| 3028.4875                                | 3041.1228 |           | 3049.2139 |

|           |           |           |
|-----------|-----------|-----------|
| 3052.1301 | 3054.2397 | 3068.1917 |
| 3074.2858 | 3079.5579 | 3081.5117 |
| 3090.1458 | 3096.5196 | 3100.3191 |
| 3109.0922 | 3124.1816 | 3136.1626 |
| 3150.3527 | 3190.6194 | 3216.6892 |

Zero-point correction (Hartree): 0.364776

TS8: MPW1B95

-----  
E(RmPW+HF-B95/6-31+G(d,p)) (Hartree): -811.112523170

Electronic state : 1-A

Cartesian coordinates (Angs):

|   |           |           |           |
|---|-----------|-----------|-----------|
| C | -1.389818 | 0.892720  | 0.518860  |
| C | -1.407433 | -0.425297 | -0.343241 |
| C | -2.866267 | 1.074571  | 0.132714  |
| C | -2.958888 | -0.420477 | -0.208548 |
| C | -3.463474 | -1.223612 | 0.982771  |
| C | -3.723545 | -0.797786 | -1.461345 |
| C | -0.438080 | 2.042983  | 0.295669  |
| C | 0.840449  | 2.090571  | 1.106272  |
| C | 2.068217  | 1.534585  | 0.368166  |
| C | -0.689909 | 3.024719  | -0.573537 |
| C | 1.721108  | 0.410784  | -0.558448 |
| C | 0.722897  | -2.022345 | -0.369167 |
| C | -0.726700 | -1.739792 | 0.025014  |
| C | 1.520811  | -0.987934 | 1.858802  |
| H | -1.335939 | 0.603512  | 1.574195  |
| H | -1.174821 | -0.154820 | -1.381282 |
| H | -2.976431 | 1.680765  | -0.767383 |
| H | -3.534678 | 1.465697  | 0.902351  |
| H | -4.521874 | -1.009777 | 1.148662  |
| H | -2.928428 | -0.975268 | 1.902248  |
| H | -3.364262 | -2.298761 | 0.817865  |
| H | -4.797808 | -0.647281 | -1.326888 |
| H | -3.567933 | -1.850820 | -1.713051 |
| H | -3.402801 | -0.197125 | -2.315261 |
| H | 0.696768  | 1.564019  | 2.049116  |
| H | 1.056240  | 3.127519  | 1.369364  |
| H | 2.873218  | 1.265934  | 1.048844  |
| H | 2.473654  | 2.311040  | -0.292027 |
| H | 0.004032  | 3.849049  | -0.694606 |
| H | -1.578258 | 3.053756  | -1.189746 |
| H | 0.739912  | 0.464893  | -1.015048 |
| H | 0.917223  | -3.080894 | -0.172646 |
| H | 0.880452  | -1.883188 | -1.441798 |
| H | -1.325586 | -2.518604 | -0.462032 |
| H | -0.853267 | -1.919188 | 1.096738  |
| H | 0.566735  | -0.498287 | 2.035662  |
| H | 2.328496  | -0.418150 | 2.313640  |
| H | 1.486453  | -1.960622 | 2.355817  |
| C | 1.819994  | -1.258040 | 0.388988  |
| O | 3.026069  | -1.611609 | 0.153640  |
| O | 3.779937  | -0.109685 | -1.000867 |
| O | 2.589336  | 0.077882  | -1.505341 |

Rotational constants (GHz): 0.6678100 0.3187700 0.2643900

Vibrational harmonic frequencies (cm-1):

|           |          |          |
|-----------|----------|----------|
| -496.9483 | 52.8049  | 75.1247  |
| 91.6646   | 112.7501 | 150.4069 |
| 157.7515  | 187.2151 | 217.2778 |
| 226.0668  | 233.7159 | 239.6458 |

|           |           |           |
|-----------|-----------|-----------|
| 273.2671  | 279.9183  | 294.1986  |
| 297.3983  | 306.8901  | 320.6544  |
| 323.6104  | 345.3944  | 377.6786  |
| 399.7111  | 419.4246  | 433.9471  |
| 456.9101  | 478.2688  | 519.5054  |
| 542.0576  | 559.8229  | 565.3059  |
| 584.8489  | 636.9574  | 708.0264  |
| 737.8351  | 750.5452  | 772.3230  |
| 810.1649  | 828.0656  | 857.0078  |
| 883.2310  | 911.7011  | 922.0455  |
| 942.2897  | 950.4096  | 957.9208  |
| 962.9396  | 976.5661  | 1001.1578 |
| 1008.7361 | 1014.5010 | 1023.4336 |
| 1029.7655 | 1041.9496 | 1056.7771 |
| 1075.6764 | 1108.3937 | 1123.0801 |
| 1144.0179 | 1153.6042 | 1172.0619 |
| 1182.6511 | 1205.6817 | 1217.1054 |
| 1229.2697 | 1233.6373 | 1240.9150 |
| 1264.1338 | 1269.3307 | 1287.6285 |
| 1307.8126 | 1315.1381 | 1328.6373 |
| 1330.9986 | 1343.0050 | 1361.4686 |
| 1366.5707 | 1389.6661 | 1391.5130 |
| 1410.0515 | 1414.6180 | 1423.8028 |
| 1448.9405 | 1452.1903 | 1467.8080 |
| 1477.3361 | 1484.3763 | 1486.6411 |
| 1489.0862 | 1496.4206 | 1499.7776 |
| 1504.8062 | 1508.0134 | 1511.5568 |
| 1513.3863 | 1519.9797 | 1730.3471 |
| 3042.9183 | 3051.8315 | 3058.5288 |
| 3062.7513 | 3068.4965 | 3072.0583 |
| 3079.7743 | 3089.8385 | 3097.9386 |
| 3107.2711 | 3108.2575 | 3130.8901 |
| 3135.5155 | 3146.2163 | 3148.2998 |
| 3151.2265 | 3157.2189 | 3158.7969 |
| 3169.2374 | 3176.9262 | 3192.5902 |
| 3216.4733 | 3243.5154 | 3281.2682 |

Zero-point correction (Hartree): 0.369830

**TS9:** B3LYP

-----

E(RB+HF-LYP/6-311G(d,p)) (Hartree): -811.721398225

Electronic state : 1-A

Cartesian coordinates (Angs):

|   |           |           |           |
|---|-----------|-----------|-----------|
| C | 1.462917  | 0.601983  | -0.089778 |
| C | 1.105212  | -0.890492 | 0.161048  |
| C | 2.972492  | 0.192261  | -0.093337 |
| C | 2.550035  | -1.292786 | -0.316868 |
| C | 2.634805  | -1.688994 | -1.795221 |
| C | 3.258001  | -2.331064 | 0.550733  |
| C | 1.031265  | 1.710666  | 0.838649  |
| C | 1.095602  | 3.113806  | 0.263221  |
| C | -0.027038 | 3.406066  | -0.764352 |
| C | 0.633115  | 1.513158  | 2.096886  |
| C | -1.399234 | 3.365838  | -0.137099 |
| C | -1.429524 | -0.832555 | 0.020953  |
| C | -0.130361 | -1.477172 | -0.515121 |
| C | -3.867882 | -0.726274 | -0.891794 |
| H | 1.172460  | 0.862637  | -1.113804 |
| H | 1.041511  | -1.082308 | 1.236763  |
| H | 3.421507  | 0.344713  | 0.890979  |
| H | 3.615265  | 0.645280  | -0.852750 |

|                                          |           |           |           |
|------------------------------------------|-----------|-----------|-----------|
| H                                        | 3.682905  | -1.775500 | -2.099537 |
| H                                        | 2.162529  | -0.953435 | -2.452249 |
| H                                        | 2.155487  | -2.655484 | -1.977546 |
| H                                        | 4.309441  | -2.435741 | 0.261749  |
| H                                        | 2.786464  | -3.314344 | 0.449788  |
| H                                        | 3.227141  | -2.052511 | 1.607894  |
| H                                        | 2.057976  | 3.270356  | -0.236391 |
| H                                        | 1.039999  | 3.847491  | 1.073376  |
| H                                        | -0.008694 | 2.703715  | -1.600032 |
| H                                        | 0.122154  | 4.416347  | -1.167509 |
| H                                        | 0.370815  | 2.345443  | 2.741864  |
| H                                        | 0.548005  | 0.524532  | 2.530545  |
| H                                        | -1.551293 | 4.079633  | 0.703316  |
| H                                        | -1.459518 | -1.613561 | 1.150240  |
| H                                        | -1.426771 | 0.246622  | -0.109202 |
| H                                        | -0.163589 | -2.556946 | -0.358403 |
| H                                        | -0.076425 | -1.304133 | -1.596069 |
| H                                        | -3.851706 | 0.343556  | -0.667928 |
| H                                        | -4.812601 | -1.166426 | -0.569847 |
| H                                        | -3.775584 | -0.825870 | -1.978400 |
| C                                        | -2.709616 | -1.376697 | -0.219120 |
| O                                        | -2.997363 | -2.489560 | 0.412154  |
| O                                        | -1.916416 | -2.847464 | 1.256379  |
| O                                        | -2.294499 | 2.634458  | -0.483489 |
| Rotational constants (GHz):              | 0.3831200 | 0.3525100 | 0.2163100 |
| Vibrational harmonic frequencies (cm-1): |           |           |           |
| -1581.1157                               | 24.6850   |           | 31.4525   |
| 44.6208                                  | 50.5580   |           | 61.9934   |
| 76.6950                                  | 78.2933   |           | 108.8645  |
| 138.1396                                 | 149.3638  |           | 155.5621  |
| 194.9362                                 | 211.5491  |           | 219.1782  |
| 240.7309                                 | 253.7947  |           | 275.8399  |
| 283.8753                                 | 307.2393  |           | 325.4019  |
| 353.9186                                 | 374.5241  |           | 382.1766  |
| 393.2506                                 | 461.1919  |           | 485.5370  |
| 499.2407                                 | 508.5066  |           | 563.7963  |
| 613.7590                                 | 637.1592  |           | 653.3741  |
| 686.4698                                 | 720.2929  |           | 747.4097  |
| 785.6826                                 | 816.5186  |           | 866.7172  |
| 872.6900                                 | 880.3917  |           | 893.4699  |
| 916.3240                                 | 920.3648  |           | 929.8035  |
| 932.9459                                 | 953.5097  |           | 956.8357  |
| 994.5640                                 | 1001.1216 |           | 1007.2277 |
| 1020.6305                                | 1030.3557 |           | 1037.1703 |
| 1044.2536                                | 1048.6671 |           | 1067.0036 |
| 1075.8059                                | 1116.8130 |           | 1122.2840 |
| 1180.5212                                | 1192.2390 |           | 1206.8865 |
| 1217.4387                                | 1221.6977 |           | 1224.1810 |
| 1254.5437                                | 1262.6050 |           | 1270.4338 |
| 1288.3809                                | 1312.8987 |           | 1327.1470 |
| 1337.1853                                | 1346.3234 |           | 1354.0853 |
| 1374.7265                                | 1401.3502 |           | 1403.4583 |
| 1415.5366                                | 1419.8378 |           | 1420.8264 |
| 1422.9037                                | 1455.6074 |           | 1468.8975 |
| 1470.7466                                | 1484.7300 |           | 1487.1536 |
| 1488.1996                                | 1490.1726 |           | 1492.8555 |
| 1497.6831                                | 1507.2732 |           | 1510.2838 |
| 1528.0858                                | 1703.4819 |           | 1804.4436 |
| 1836.7233                                | 2865.2755 |           | 3010.5524 |
| 3012.7869                                | 3013.9132 |           | 3019.1958 |
| 3021.4942                                | 3026.4159 |           | 3029.0737 |

|           |           |           |
|-----------|-----------|-----------|
| 3037.6573 | 3045.0999 | 3062.0866 |
| 3069.8550 | 3078.1597 | 3080.9294 |
| 3085.7396 | 3088.1146 | 3089.8750 |
| 3093.0596 | 3097.9070 | 3127.0162 |
| 3135.6888 | 3142.8508 | 3216.7962 |

Zero-point correction (Hartree): 0.357981

### TS10

-----  
 E(RB+HF-LYP/6-311G(d,p)) (Hartree): -811.723158258

Electronic state : 1-A

Cartesian coordinates (Angs):

|   |           |           |           |
|---|-----------|-----------|-----------|
| C | 0.858909  | -0.709006 | 0.469044  |
| C | 1.832831  | -0.061075 | -0.563078 |
| C | 1.979365  | -1.750411 | 0.794644  |
| C | 3.032443  | -0.828336 | 0.110804  |
| C | 3.807254  | -0.002884 | 1.144340  |
| C | 3.998557  | -1.511022 | -0.855365 |
| C | -0.497778 | -1.247135 | 0.061043  |
| C | -1.533330 | -1.214448 | 1.167383  |
| C | -2.893826 | -1.859179 | 0.868518  |
| C | -0.736369 | -1.754592 | -1.150042 |
| C | -3.743869 | -1.089457 | -0.123926 |
| C | 0.622344  | 2.127822  | -1.253850 |
| C | 1.912926  | 1.456023  | -0.724557 |
| C | -0.399311 | 3.232596  | 0.889782  |
| H | 0.733380  | -0.037222 | 1.325053  |
| H | 1.658265  | -0.504447 | -1.548299 |
| H | 1.820930  | -2.677373 | 0.239445  |
| H | 2.144681  | -1.991095 | 1.847782  |
| H | 4.489614  | -0.652957 | 1.700647  |
| H | 3.146750  | 0.475438  | 1.873111  |
| H | 4.409088  | 0.779347  | 0.671222  |
| H | 4.692271  | -2.166812 | -0.318592 |
| H | 4.597869  | -0.775564 | -1.403510 |
| H | 3.462978  | -2.121380 | -1.587952 |
| H | -1.696261 | -0.167994 | 1.456653  |
| H | -1.101526 | -1.696572 | 2.053907  |
| H | -3.470091 | -1.875667 | 1.804009  |
| H | -2.800408 | -2.892546 | 0.526061  |
| H | -1.695754 | -2.170417 | -1.428065 |
| H | 0.025549  | -1.772583 | -1.921291 |
| H | -3.792115 | 0.005279  | 0.051017  |
| H | 0.877759  | 3.121928  | -1.640180 |
| H | 0.184965  | 1.559020  | -2.077632 |
| H | 2.719183  | 1.684906  | -1.430124 |
| H | 2.189361  | 1.930904  | 0.220940  |
| H | -0.574966 | 2.795366  | 1.873807  |
| H | -1.751715 | 3.262000  | 0.789699  |
| H | 0.393003  | 3.974261  | 0.889280  |
| C | -0.418647 | 2.344331  | -0.205805 |
| O | -1.569770 | 1.773966  | -0.441329 |
| O | -2.526770 | 2.219231  | 0.504564  |
| O | -4.352436 | -1.603843 | -1.030809 |

Rotational constants (GHz): 0.5398500 0.2908300 0.2200200

Vibrational harmonic frequencies (cm-1):

|            |          |          |
|------------|----------|----------|
| -1605.4842 | 26.5709  | 38.3834  |
| 47.7723    | 50.1352  | 62.7241  |
| 79.4878    | 85.9356  | 108.2502 |
| 141.1413   | 155.8024 | 192.5282 |
| 209.1349   | 221.6903 | 239.4182 |

|           |           |           |
|-----------|-----------|-----------|
| 257.6431  | 266.8394  | 289.9374  |
| 298.1673  | 343.6303  | 349.0984  |
| 361.7739  | 388.3794  | 407.3761  |
| 448.8102  | 487.2966  | 505.2430  |
| 518.8742  | 530.0129  | 557.4736  |
| 565.2490  | 616.2614  | 700.6881  |
| 719.8599  | 738.6470  | 744.1986  |
| 772.8191  | 797.8991  | 846.6099  |
| 870.7747  | 879.4571  | 881.3824  |
| 898.3417  | 914.8906  | 925.2668  |
| 932.0459  | 945.1001  | 948.7864  |
| 955.0164  | 987.8241  | 1002.2215 |
| 1014.3199 | 1022.8573 | 1031.4984 |
| 1043.5613 | 1051.1367 | 1059.6631 |
| 1088.1058 | 1105.5931 | 1119.6816 |
| 1163.2170 | 1184.3608 | 1207.5171 |
| 1209.6581 | 1220.3183 | 1227.3389 |
| 1241.6520 | 1255.1504 | 1266.2293 |
| 1279.6343 | 1310.3462 | 1318.5836 |
| 1336.7901 | 1344.5794 | 1349.5237 |
| 1377.2883 | 1392.0282 | 1394.8712 |
| 1404.4778 | 1413.3799 | 1423.0100 |
| 1429.0068 | 1451.4811 | 1466.6281 |
| 1467.2069 | 1475.7791 | 1485.2048 |
| 1487.1979 | 1492.6050 | 1492.9322 |
| 1499.6040 | 1509.6923 | 1509.9378 |
| 1528.7591 | 1703.3794 | 1801.0404 |
| 1834.3230 | 2915.0396 | 2998.8979 |
| 3009.7080 | 3010.1653 | 3017.7216 |
| 3020.6505 | 3024.4140 | 3027.4796 |
| 3031.4019 | 3039.3579 | 3045.1159 |
| 3067.7292 | 3070.4233 | 3078.8091 |
| 3081.6797 | 3084.0280 | 3085.0681 |
| 3086.1841 | 3092.6640 | 3099.7502 |
| 3143.9652 | 3175.9271 | 3226.6506 |

Zero-point correction (Hartree): 0.358212

### TS11

-----  
E(RB+HF-LYP/6-311G(d,p)) (Hartree): -811.715740876

Electronic state : 1-A

Cartesian coordinates (Angs):

|   |           |           |           |
|---|-----------|-----------|-----------|
| C | -0.734689 | -0.778221 | -0.162995 |
| C | -1.953959 | -0.101212 | 0.527862  |
| C | -1.678116 | -1.954815 | -0.583245 |
| C | -2.917496 | -1.066604 | -0.262273 |
| C | -3.515935 | -0.461774 | -1.536920 |
| C | -4.011544 | -1.724387 | 0.576836  |
| C | 0.508478  | -1.163069 | 0.599986  |
| C | 1.659998  | -1.685308 | -0.243077 |
| C | 2.438639  | -0.548630 | -0.959634 |
| C | 0.618196  | -1.111687 | 1.928246  |
| C | 3.321274  | 0.286625  | -0.248529 |
| C | -1.069939 | 2.282592  | 1.075674  |
| C | -2.181786 | 1.409725  | 0.446427  |
| C | -0.192685 | 3.235204  | -1.184064 |
| H | -0.447377 | -0.211955 | -1.056699 |
| H | -1.977739 | -0.396728 | 1.581055  |
| H | -1.584543 | -2.797734 | 0.105480  |
| H | -1.592404 | -2.323615 | -1.608278 |
| H | -4.007730 | -1.244458 | -2.122939 |

|                                          |           |           |           |           |
|------------------------------------------|-----------|-----------|-----------|-----------|
| H                                        | -2.754550 | -0.006732 | -2.176988 |           |
| H                                        | -4.266128 | 0.301996  | -1.310036 |           |
| H                                        | -4.528796 | -2.504558 | 0.008138  |           |
| H                                        | -4.763176 | -0.992022 | 0.891438  |           |
| H                                        | -3.595275 | -2.187297 | 1.475986  |           |
| H                                        | 1.278990  | -2.365181 | -1.012912 |           |
| H                                        | 2.350595  | -2.252290 | 0.378796  |           |
| H                                        | 1.803440  | 0.017151  | -1.639012 |           |
| H                                        | 3.558867  | -1.322282 | -1.169169 |           |
| H                                        | 1.523033  | -1.441528 | 2.427137  |           |
| H                                        | -0.171190 | -0.735012 | 2.567462  |           |
| H                                        | 3.273572  | 1.363763  | -0.120838 |           |
| H                                        | -1.508259 | 3.249646  | 1.356321  |           |
| H                                        | -0.669826 | 1.830602  | 1.984678  |           |
| H                                        | -3.122349 | 1.633090  | 0.961989  |           |
| H                                        | -2.338193 | 1.714684  | -0.592130 |           |
| H                                        | -0.436919 | 2.446119  | -1.902379 |           |
| H                                        | 0.690917  | 3.762631  | -1.542246 |           |
| H                                        | -1.047990 | 3.914287  | -1.146608 |           |
| C                                        | 0.109445  | 2.618654  | 0.173414  |           |
| O                                        | 1.254851  | 2.438682  | 0.529679  |           |
| O                                        | 4.532172  | -1.570044 | -0.313476 |           |
| O                                        | 4.454695  | -0.228030 | 0.130735  |           |
| Rotational constants (GHz):              |           | 0.5621900 | 0.2697700 | 0.2120700 |
| Vibrational harmonic frequencies (cm-1): |           |           |           |           |
| -1614.5901                               |           | 25.1170   |           | 33.7641   |
| 42.7742                                  |           | 50.0868   |           | 56.1162   |
| 69.5860                                  |           | 93.6147   |           | 113.8404  |
| 128.1222                                 |           | 133.4150  |           | 157.8726  |
| 186.8243                                 |           | 210.6314  |           | 234.7804  |
| 245.8580                                 |           | 269.5658  |           | 284.3919  |
| 294.3429                                 |           | 308.0581  |           | 353.4425  |
| 368.9929                                 |           | 382.3791  |           | 409.2714  |
| 460.7915                                 |           | 470.2160  |           | 498.4290  |
| 531.0725                                 |           | 550.4100  |           | 563.7988  |
| 579.6952                                 |           | 645.4135  |           | 677.9373  |
| 715.8304                                 |           | 728.9659  |           | 762.2372  |
| 785.6320                                 |           | 794.1283  |           | 852.9678  |
| 863.4607                                 |           | 880.5959  |           | 881.9101  |
| 892.0158                                 |           | 901.2451  |           | 910.4834  |
| 922.1436                                 |           | 944.9367  |           | 949.7094  |
| 973.4181                                 |           | 987.1521  |           | 991.8576  |
| 998.9326                                 |           | 1010.2671 |           | 1027.0359 |
| 1031.4278                                |           | 1044.0702 |           | 1052.3147 |
| 1109.8861                                |           | 1120.1724 |           | 1153.9677 |
| 1170.0822                                |           | 1183.4125 |           | 1202.7686 |
| 1211.5736                                |           | 1229.0708 |           | 1239.0067 |
| 1251.3891                                |           | 1258.4361 |           | 1262.6476 |
| 1267.9227                                |           | 1280.5183 |           | 1312.2009 |
| 1313.6876                                |           | 1342.2164 |           | 1350.0840 |
| 1356.9395                                |           | 1380.6932 |           | 1385.0091 |
| 1395.9556                                |           | 1400.4608 |           | 1410.1852 |
| 1418.4076                                |           | 1450.8229 |           | 1465.9465 |
| 1468.0150                                |           | 1481.7143 |           | 1486.1430 |
| 1487.1387                                |           | 1496.5902 |           | 1496.8784 |
| 1500.9541                                |           | 1508.3051 |           | 1510.8904 |
| 1520.5589                                |           | 1701.3754 |           | 1779.1126 |
| 1835.4034                                |           | 3006.8319 |           | 3009.2517 |
| 3011.8150                                |           | 3018.4219 |           | 3027.9738 |
| 3029.2099                                |           | 3034.6867 |           | 3040.6822 |
| 3044.8659                                |           | 3066.4663 |           | 3069.1623 |

|           |           |           |
|-----------|-----------|-----------|
| 3079.2317 | 3081.2553 | 3083.4179 |
| 3093.6826 | 3096.1085 | 3100.8328 |
| 3108.7285 | 3125.1399 | 3136.3772 |
| 3137.0450 | 3188.3480 | 3212.7355 |

Zero-point correction (Hartree): 0.358429

**TS12**

-----  
E(RB+HF-LYP/6-311G(d,p)) (Hartree): -811.715239291

Electronic state : 1-A

Cartesian coordinates (Angs):

|   |           |           |           |
|---|-----------|-----------|-----------|
| C | 1.532716  | -0.080801 | 0.072563  |
| C | 0.583773  | -1.286436 | 0.317252  |
| C | 2.715362  | -1.092063 | -0.071121 |
| C | 1.680284  | -2.237211 | -0.296237 |
| C | 1.485513  | -2.537444 | -1.786520 |
| C | 1.929390  | -3.529610 | 0.477919  |
| C | 1.681217  | 1.056209  | 1.050135  |
| C | 2.507896  | 2.239037  | 0.575241  |
| C | 1.957030  | 2.927753  | -0.702883 |
| C | 1.152798  | 1.056302  | 2.275823  |
| C | 0.502165  | 3.297234  | -0.548581 |
| C | -1.784677 | -0.348669 | 0.535214  |
| C | -0.820349 | -1.247913 | -0.284065 |
| C | -3.146533 | 0.616411  | -1.450322 |
| H | 1.303056  | 0.332066  | -0.914628 |
| H | 0.512814  | -1.504779 | 1.387491  |
| H | 3.251413  | -1.208235 | 0.874228  |
| H | 3.438108  | -0.912973 | -0.871369 |
| H | 2.369448  | -3.046362 | -2.183595 |
| H | 1.336064  | -1.630143 | -2.378131 |
| H | 0.624491  | -3.191471 | -1.953994 |
| H | 2.812532  | -4.052594 | 0.095804  |
| H | 1.077330  | -4.212336 | 0.390125  |
| H | 2.091322  | -3.330687 | 1.541045  |
| H | 3.533111  | 1.917356  | 0.357991  |
| H | 2.576541  | 2.973781  | 1.382171  |
| H | 2.058557  | 2.288817  | -1.581662 |
| H | 2.533591  | 3.843587  | -0.879048 |
| H | 1.302869  | 1.890199  | 2.953409  |
| H | 0.557463  | 0.233999  | 2.652459  |
| H | 0.287178  | 4.068709  | 0.222964  |
| H | -1.984489 | -0.779989 | 1.512025  |
| H | -1.333704 | 0.636566  | 0.680738  |
| H | -1.236424 | -2.261435 | -0.311184 |
| H | -0.761852 | -0.903936 | -1.321313 |
| H | -3.704438 | 1.528196  | -1.199520 |
| H | -3.740476 | 0.085314  | -2.199653 |
| H | -2.172100 | 0.911098  | -1.834068 |
| C | -3.081786 | -0.176767 | -0.193040 |
| O | -4.164919 | -0.786183 | 0.133526  |
| O | -4.198359 | -0.213507 | 1.513659  |
| O | -0.399372 | 2.798321  | -1.178503 |

Rotational constants (GHz): 0.4156500 0.3086600 0.2200200

Vibrational harmonic frequencies (cm-1):

|           |          |          |
|-----------|----------|----------|
| -423.7448 | 25.9753  | 30.5048  |
| 49.1747   | 53.8188  | 64.7779  |
| 81.1066   | 86.3051  | 105.2121 |
| 116.6808  | 140.6173 | 158.6794 |
| 182.5735  | 200.9829 | 211.8951 |
| 230.0806  | 256.4493 | 277.3870 |



|           |           |           |
|-----------|-----------|-----------|
| 289.4666  | 312.0684  | 348.6852  |
| 355.5387  | 375.2190  | 385.8794  |
| 400.9046  | 435.9718  | 463.3930  |
| 488.7811  | 501.9047  | 508.9630  |
| 545.2210  | 565.7459  | 638.6379  |
| 719.4597  | 739.7884  | 758.1637  |
| 782.7321  | 798.0799  | 807.8239  |
| 862.6016  | 871.7505  | 879.4076  |
| 894.8069  | 920.9409  | 933.4427  |
| 948.0933  | 955.5535  | 964.9949  |
| 988.6543  | 996.5505  | 1001.9649 |
| 1020.7241 | 1029.9633 | 1037.8948 |
| 1042.8767 | 1053.1952 | 1082.2739 |
| 1103.2674 | 1116.9829 | 1175.4101 |
| 1178.3464 | 1202.1038 | 1208.2763 |
| 1219.4358 | 1225.3914 | 1242.5364 |
| 1261.5926 | 1267.3987 | 1272.9150 |
| 1291.6071 | 1299.8983 | 1324.8587 |
| 1336.6252 | 1343.9326 | 1354.2383 |
| 1378.4068 | 1381.3494 | 1403.0690 |
| 1416.9002 | 1421.9916 | 1422.7039 |
| 1447.3660 | 1453.4969 | 1474.3880 |
| 1476.4854 | 1479.2353 | 1487.2711 |
| 1487.8682 | 1488.8349 | 1496.0218 |
| 1499.1719 | 1509.5555 | 1511.8475 |
| 1520.1365 | 1700.4804 | 1800.7979 |
| 2877.9318 | 3011.2825 | 3018.5039 |
| 3018.8014 | 3019.0695 | 3022.8140 |
| 3030.0193 | 3032.4800 | 3037.9372 |
| 3044.3522 | 3061.8000 | 3065.6221 |
| 3066.4211 | 3070.1795 | 3076.5504 |
| 3080.2879 | 3082.0117 | 3087.9057 |
| 3092.0324 | 3102.8284 | 3138.9741 |
| 3154.7922 | 3156.1923 | 3220.0796 |

Zero-point correction (Hartree): 0.360478

### TS13

-----

E(RB+HF-LYP/6-311G(d,p)) (Hartree): -811.715713073

Electronic state : 1-A

Cartesian coordinates (Angs):

|   |           |           |           |
|---|-----------|-----------|-----------|
| C | 0.994997  | -0.801252 | 0.465872  |
| C | 1.926777  | -0.109836 | -0.574181 |
| C | 2.106953  | -1.880704 | 0.664021  |
| C | 3.144956  | -0.918698 | 0.011095  |
| C | 3.949897  | -0.159942 | 1.072315  |
| C | 4.082826  | -1.537866 | -1.023181 |
| C | -0.398805 | -1.263304 | 0.099469  |
| C | -1.386017 | -1.224530 | 1.247925  |
| C | -2.841244 | -1.539087 | 0.894876  |
| C | -0.715105 | -1.705576 | -1.119888 |
| C | -3.468517 | -0.535354 | 0.000134  |
| C | 0.691117  | 2.104884  | -1.144153 |
| C | 2.005237  | 1.412275  | -0.677581 |
| C | 0.185783  | 3.878691  | 0.669147  |
| H | 0.932912  | -0.179410 | 1.363932  |
| H | 1.709781  | -0.510759 | -1.569321 |
| H | 1.914517  | -2.757211 | 0.041284  |
| H | 2.308784  | -2.208665 | 1.686891  |
| H | 4.645762  | -0.842867 | 1.569462  |
| H | 3.311176  | 0.275232  | 1.846051  |

|                                          |           |           |           |
|------------------------------------------|-----------|-----------|-----------|
| H                                        | 4.540311  | 0.648572  | 0.630201  |
| H                                        | 4.791926  | -2.224556 | -0.548674 |
| H                                        | 4.666289  | -0.768269 | -1.540655 |
| H                                        | 3.526643  | -2.101418 | -1.777712 |
| H                                        | -1.342028 | -0.224868 | 1.692237  |
| H                                        | -1.048160 | -1.916869 | 2.029215  |
| H                                        | -3.451951 | -1.526848 | 1.811231  |
| H                                        | -2.983308 | -2.536302 | 0.465967  |
| H                                        | -1.702983 | -2.067787 | -1.374997 |
| H                                        | 0.009316  | -1.726985 | -1.925666 |
| H                                        | -3.128541 | 0.496525  | -0.020225 |
| H                                        | 0.946993  | 2.986798  | -1.739570 |
| H                                        | 0.103273  | 1.429200  | -1.767791 |
| H                                        | 2.797307  | 1.661249  | -1.391803 |
| H                                        | 2.323931  | 1.838786  | 0.279396  |
| H                                        | 1.265579  | 3.989654  | 0.798497  |
| H                                        | -0.323993 | 3.978876  | 1.626426  |
| H                                        | -0.141700 | 4.688593  | 0.007652  |
| C                                        | -0.174128 | 2.552772  | 0.024422  |
| O                                        | -1.110976 | 1.895623  | 0.428288  |
| O                                        | -5.269303 | 0.243843  | -0.371378 |
| O                                        | -4.407248 | -0.893905 | -0.788632 |
| Rotational constants (GHz):              | 0.5703000 | 0.2450900 | 0.1938300 |
| Vibrational harmonic frequencies (cm-1): |           |           |           |
| -440.3431                                | 21.2519   | 26.9366   |           |
| 39.7470                                  | 48.6815   | 64.9002   |           |
| 76.7339                                  | 91.0380   | 100.3429  |           |
| 108.1081                                 | 123.7695  | 150.1400  |           |
| 191.8027                                 | 209.1931  | 222.9182  |           |
| 245.6949                                 | 260.8787  | 270.7566  |           |
| 297.4059                                 | 307.0877  | 309.7372  |           |
| 358.1365                                 | 372.8173  | 380.5538  |           |
| 418.1474                                 | 447.3503  | 472.7746  |           |
| 507.8079                                 | 521.1138  | 523.6699  |           |
| 565.6153                                 | 601.9793  | 612.5286  |           |
| 703.7387                                 | 735.1191  | 753.7941  |           |
| 768.8453                                 | 778.2423  | 797.4439  |           |
| 856.3747                                 | 875.7640  | 879.6115  |           |
| 899.0334                                 | 901.0264  | 914.6604  |           |
| 940.3913                                 | 957.0048  | 971.8565  |           |
| 985.9153                                 | 989.7333  | 994.1775  |           |
| 1017.9815                                | 1027.4548 | 1046.1288 |           |
| 1050.3049                                | 1051.6251 | 1097.7858 |           |
| 1111.7512                                | 1124.1397 | 1164.7311 |           |
| 1175.9989                                | 1192.1971 | 1206.7595 |           |
| 1218.0256                                | 1224.9158 | 1235.1795 |           |
| 1249.4213                                | 1254.4095 | 1274.3501 |           |
| 1282.0809                                | 1312.6958 | 1339.1775 |           |
| 1342.3089                                | 1352.2617 | 1363.6748 |           |
| 1380.6447                                | 1384.1254 | 1395.9792 |           |
| 1404.3547                                | 1416.2437 | 1424.3927 |           |
| 1431.7136                                | 1460.4251 | 1463.5275 |           |
| 1475.6202                                | 1476.7267 | 1485.5004 |           |
| 1487.1733                                | 1488.4999 | 1495.8288 |           |
| 1498.7484                                | 1511.8846 | 1512.1404 |           |
| 1527.5963                                | 1700.2222 | 1780.5513 |           |
| 2989.1998                                | 3009.6704 | 3016.3293 |           |
| 3017.3224                                | 3021.5528 | 3027.6512 |           |
| 3031.1582                                | 3038.2223 | 3042.3664 |           |
| 3044.8549                                | 3051.4648 | 3059.0503 |           |
| 3066.7626                                | 3067.8479 | 3079.0306 |           |

|           |           |           |
|-----------|-----------|-----------|
| 3080.1948 | 3085.3130 | 3087.4600 |
| 3096.9650 | 3102.2460 | 3140.4068 |
| 3146.9366 | 3166.7456 | 3218.7323 |

Zero-point correction (Hartree): 0.360536

**TS14**

-----  
E(RB+HF-LYP/6-311G(d,p)) (Hartree): -811.717863883

Electronic state : 1-A

Cartesian coordinates (Angs):

|   |           |           |           |
|---|-----------|-----------|-----------|
| C | 0.895830  | -0.821083 | 0.364209  |
| C | 1.782010  | 0.023314  | -0.594388 |
| C | 2.126026  | -1.757103 | 0.591698  |
| C | 3.061328  | -0.636641 | 0.039731  |
| C | 3.689659  | 0.182101  | 1.173004  |
| C | 4.132409  | -1.081737 | -0.953852 |
| C | -0.414303 | -1.427073 | -0.088750 |
| C | -1.384968 | -1.687745 | 1.043901  |
| C | -2.774898 | -2.206433 | 0.654902  |
| C | -0.677426 | -1.720836 | -1.365937 |
| C | -3.599262 | -1.175608 | -0.086898 |
| C | 0.223741  | 2.002891  | -1.121369 |
| C | 1.617418  | 1.541792  | -0.629535 |
| C | -1.853687 | 3.377563  | -0.465858 |
| H | 0.711373  | -0.244813 | 1.274450  |
| H | 1.683027  | -0.361167 | -1.615156 |
| H | 2.090469  | -2.622792 | -0.074290 |
| H | 2.311279  | -2.099507 | 1.612747  |
| H | 4.438794  | -0.419904 | 1.696781  |
| H | 2.950881  | 0.501918  | 1.912440  |
| H | 4.193062  | 1.076218  | 0.791453  |
| H | 4.900102  | -1.686819 | -0.459869 |
| H | 4.634250  | -0.220493 | -1.408825 |
| H | 3.700976  | -1.683731 | -1.758856 |
| H | -1.499803 | -0.744666 | 1.593504  |
| H | -0.918628 | -2.391079 | 1.745719  |
| H | -3.325595 | -2.426712 | 1.579867  |
| H | -2.744450 | -3.128607 | 0.069583  |
| H | -1.611468 | -2.169420 | -1.678938 |
| H | 0.040917  | -1.531017 | -2.155727 |
| H | -3.539485 | -0.150277 | 0.337943  |
| H | 0.289782  | 2.771136  | -1.898168 |
| H | -0.308061 | 1.164158  | -1.599653 |
| H | 2.370174  | 1.967188  | -1.301202 |
| H | 1.809832  | 1.964907  | 0.358279  |
| H | -2.414141 | 3.687620  | 0.410630  |
| H | -2.531589 | 2.867093  | -1.155207 |
| H | -1.436654 | 4.239177  | -1.003664 |
| C | -0.726290 | 2.477607  | -0.072778 |
| O | -0.453821 | 2.203685  | 1.154785  |
| O | -1.809363 | 1.592066  | 1.372640  |
| O | -4.284386 | -1.408809 | -1.052716 |

Rotational constants (GHz): 0.5097100 0.3000400 0.2250900

Vibrational harmonic frequencies (cm-1):

|           |          |          |
|-----------|----------|----------|
| -424.2300 | 10.4812  | 33.9582  |
| 47.8183   | 49.8171  | 60.9997  |
| 72.5301   | 91.9227  | 108.2123 |
| 136.0909  | 149.5402 | 193.1525 |
| 215.5643  | 221.0177 | 236.7133 |
| 248.5543  | 263.8123 | 271.6212 |
| 293.6564  | 302.3976 | 325.0260 |

|           |           |           |
|-----------|-----------|-----------|
| 351.5684  | 364.6795  | 385.7585  |
| 392.4505  | 426.1799  | 453.3016  |
| 491.5050  | 512.5421  | 516.0701  |
| 567.0337  | 579.2307  | 617.5179  |
| 717.3543  | 732.6352  | 751.8677  |
| 769.6873  | 775.6782  | 790.1163  |
| 867.3155  | 881.5850  | 883.6909  |
| 887.6209  | 907.3324  | 921.7256  |
| 945.1159  | 952.9675  | 957.8450  |
| 991.9063  | 1004.4572 | 1019.4413 |
| 1023.9287 | 1030.5824 | 1043.8337 |
| 1051.8661 | 1054.0539 | 1090.7401 |
| 1115.3293 | 1126.8754 | 1173.9159 |
| 1191.2596 | 1206.8170 | 1210.6371 |
| 1215.8146 | 1221.0494 | 1232.3711 |
| 1251.9035 | 1255.3118 | 1275.3061 |
| 1287.0510 | 1315.2649 | 1341.5799 |
| 1348.9346 | 1381.7407 | 1389.2630 |
| 1401.9468 | 1403.4385 | 1407.2197 |
| 1417.9851 | 1420.8989 | 1425.3935 |
| 1426.5555 | 1436.2265 | 1452.0322 |
| 1463.8410 | 1469.5736 | 1482.1042 |
| 1484.7964 | 1487.9567 | 1492.0480 |
| 1498.6795 | 1508.3411 | 1511.4682 |
| 1529.5746 | 1696.7905 | 1804.4952 |
| 2889.3244 | 2978.2127 | 2999.4317 |
| 3007.9518 | 3009.2299 | 3010.0341 |
| 3018.5470 | 3025.9077 | 3030.4934 |
| 3033.4775 | 3041.3249 | 3057.6404 |
| 3058.6707 | 3067.0408 | 3076.7361 |
| 3079.5132 | 3080.0886 | 3083.3689 |
| 3088.6836 | 3092.3758 | 3096.2455 |
| 3145.1099 | 3176.2371 | 3221.4885 |

Zero-point correction (Hartree): 0.360345

### TS15

-----  
E(RB+HF-LYP/6-311G(d,p)) (Hartree): -811.709846257

Electronic state : 1-A

Cartesian coordinates (Angs):

|   |           |           |           |
|---|-----------|-----------|-----------|
| C | -0.977061 | -0.845959 | -0.134890 |
| C | -1.913709 | 0.322565  | 0.303116  |
| C | -2.251826 | -1.711899 | -0.405844 |
| C | -3.122232 | -0.421843 | -0.385491 |
| C | -3.436352 | 0.063025  | -1.805891 |
| C | -4.401598 | -0.489201 | 0.445970  |
| C | 0.065077  | -1.458965 | 0.770846  |
| C | 1.118543  | -2.294457 | 0.068041  |
| C | 2.133100  | -1.451231 | -0.748876 |
| C | 0.055367  | -1.337294 | 2.098346  |
| C | 3.096106  | -0.733356 | 0.138377  |
| C | -0.593303 | 2.547668  | 0.729522  |
| C | -1.630678 | 1.768440  | -0.113780 |
| C | 1.512753  | 2.571231  | -0.799220 |
| H | -0.517699 | -0.587056 | -1.095167 |
| H | -2.069827 | 0.291014  | 1.385995  |
| H | -2.466247 | -2.366754 | 0.441605  |
| H | -2.269319 | -2.302583 | -1.325083 |
| H | -4.146957 | -0.620320 | -2.281283 |
| H | -2.545822 | 0.100653  | -2.439606 |
| H | -3.888580 | 1.059349  | -1.804249 |

|                                          |           |           |           |
|------------------------------------------|-----------|-----------|-----------|
| H                                        | -5.137626 | -1.154699 | -0.017533 |
| H                                        | -4.864356 | 0.499454  | 0.540254  |
| H                                        | -4.200204 | -0.863187 | 1.453771  |
| H                                        | 0.632601  | -2.980190 | -0.635670 |
| H                                        | 1.647428  | -2.920158 | 0.793077  |
| H                                        | 1.588641  | -0.718997 | -1.350447 |
| H                                        | 2.710934  | -2.047504 | -1.457723 |
|                                          |           |           |           |
| H                                        | 0.794561  | -1.836040 | 2.715832  |
| H                                        | -0.671745 | -0.728586 | 2.621190  |
| H                                        | 2.730020  | -0.359495 | 1.099094  |
| H                                        | -0.690706 | 3.611554  | 0.481610  |
| H                                        | -0.804640 | 2.427766  | 1.794497  |
| H                                        | -2.574217 | 2.321516  | -0.041877 |
| H                                        | -1.347219 | 1.805402  | -1.170759 |
| H                                        | 0.823302  | 2.524637  | -1.645625 |
| H                                        | 2.401366  | 1.968023  | -0.995358 |
| H                                        | 1.823843  | 3.617897  | -0.699395 |
| C                                        | 0.859463  | 2.153519  | 0.504535  |
| O                                        | 1.484393  | 1.560502  | 1.360156  |
| O                                        | 4.148461  | -0.004059 | -1.367225 |
| O                                        | 4.362219  | -0.660837 | -0.037396 |
| Rotational constants (GHz):              | 0.6138600 | 0.2682800 | 0.2273100 |
| Vibrational harmonic frequencies (cm-1): |           |           |           |
| -640.9104                                | 33.8901   |           | 38.1976   |
| 53.9313                                  | 63.0129   |           | 67.3053   |
| 82.0232                                  | 103.1062  |           | 113.0678  |
| 138.2024                                 | 146.2296  |           | 160.1204  |
| 190.9964                                 | 197.1663  |           | 234.6729  |
| 247.3949                                 | 261.1511  |           | 280.1286  |
| 282.0374                                 | 316.5546  |           | 338.6591  |
| 360.8538                                 | 385.5561  |           | 398.8501  |
| 407.7854                                 | 456.0518  |           | 466.1820  |
| 491.7989                                 | 508.9900  |           | 532.0778  |
| 565.9054                                 | 598.8155  |           | 643.1346  |
| 715.0599                                 | 725.6960  |           | 737.7768  |
| 763.4360                                 | 804.5814  |           | 827.1865  |
| 855.0908                                 | 861.9954  |           | 879.2299  |
| 896.8110                                 | 909.4148  |           | 926.2901  |
| 938.6326                                 | 954.8675  |           | 970.7125  |
| 978.0071                                 | 992.7272  |           | 1000.6145 |
| 1017.4290                                | 1030.4846 |           | 1040.8720 |
| 1049.8654                                | 1054.3849 |           | 1083.1237 |
| 1110.2214                                | 1119.3893 |           | 1164.1431 |
| 1168.3586                                | 1188.3172 |           | 1207.6880 |
| 1226.6405                                | 1229.5619 |           | 1238.4027 |
| 1253.2860                                | 1260.3466 |           | 1265.2387 |
| 1279.5521                                | 1314.3274 |           | 1328.8826 |
| 1336.7819                                | 1344.0916 |           | 1364.2574 |
| 1365.5887                                | 1386.2006 |           | 1394.8160 |
| 1402.8150                                | 1411.6691 |           | 1421.6335 |
| 1450.4070                                | 1454.7046 |           | 1467.9019 |
| 1481.2676                                | 1482.8012 |           | 1487.6880 |
| 1490.0498                                | 1492.9116 |           | 1493.4217 |
| 1497.2866                                | 1508.7459 |           | 1511.2343 |
| 1550.9474                                | 1707.6541 |           | 1774.7991 |
| 3010.5374                                | 3012.3805 |           | 3017.4258 |
| 3018.8825                                | 3021.0436 |           | 3022.6351 |
| 3025.9745                                | 3037.4039 |           | 3042.8928 |
| 3054.1949                                | 3055.6261 |           | 3067.7658 |
| 3068.5212                                | 3079.3453 |           | 3081.0894 |

|           |           |           |
|-----------|-----------|-----------|
| 3082.6474 | 3085.0233 | 3089.8294 |
| 3092.9674 | 3096.9131 | 3104.4852 |
| 3117.7845 | 3140.8677 | 3219.1680 |

Zero-point correction (Hartree): 0.360993

**TS16**

-----  
E(RB+HF-LYP/6-311G(d,p)) (Hartree): -811.699828096

Electronic state : 1-A

Cartesian coordinates (Angs):

|   |           |           |           |
|---|-----------|-----------|-----------|
| C | -1.441244 | 0.875574  | 0.522227  |
| C | -1.402916 | -0.485333 | -0.304384 |
| C | -2.953000 | 0.963991  | 0.185511  |
| C | -2.973264 | -0.542388 | -0.189161 |
| C | -3.490244 | -1.399665 | 0.973064  |
| C | -3.703063 | -0.908839 | -1.480048 |
| C | -0.548740 | 2.069743  | 0.216599  |
| C | 0.752029  | 2.231117  | 1.003258  |
| C | 2.015021  | 1.738629  | 0.247849  |
| C | -0.873132 | 2.994005  | -0.691747 |
| C | 1.762708  | 0.410633  | -0.451547 |
| C | 0.848024  | -1.925600 | -0.238057 |
| C | -0.641814 | -1.748490 | 0.132278  |
| C | 1.680933  | -0.797694 | 1.894964  |
| H | -1.329248 | 0.632778  | 1.584331  |
| H | -1.157538 | -0.247225 | -1.345810 |
| H | -3.148900 | 1.590855  | -0.685417 |
| H | -3.611213 | 1.286263  | 0.996237  |
| H | -4.562382 | -1.225906 | 1.108590  |
| H | -2.998256 | -1.158161 | 1.919201  |
| H | -3.351104 | -2.468221 | 0.785847  |
| H | -4.785740 | -0.785997 | -1.368738 |
| H | -3.517129 | -1.952374 | -1.757188 |
| H | -3.377759 | -0.278473 | -2.312627 |
| H | 0.663498  | 1.716706  | 1.962195  |
| H | 0.893823  | 3.288789  | 1.239793  |
| H | 2.877076  | 1.688479  | 0.918719  |
| H | 2.260946  | 2.460678  | -0.535692 |
| H | -0.228872 | 3.848496  | -0.872291 |
| H | -1.776076 | 2.945098  | -1.287032 |
| H | 0.798392  | 0.477892  | -0.953115 |
| H | 1.165691  | -2.919000 | 0.093913  |
| H | 0.972894  | -1.904286 | -1.325135 |
| H | -1.166234 | -2.593065 | -0.331043 |
| H | -0.766191 | -1.893563 | 1.209634  |
| H | 0.676640  | -0.511492 | 2.199684  |
| H | 2.397493  | -0.084225 | 2.299770  |
| H | 1.897556  | -1.776267 | 2.329943  |
| C | 1.814981  | -0.899944 | 0.374361  |
| O | 3.192998  | -1.298349 | 0.213960  |
| O | 3.671549  | -0.787990 | -1.057169 |
| O | 2.647323  | 0.137313  | -1.537387 |

Rotational constants (GHz): 0.6648500 0.3125800 0.2600500

Vibrational harmonic frequencies (cm-1):

|           |          |          |
|-----------|----------|----------|
| -203.4540 | 53.3989  | 57.4285  |
| 87.2479   | 125.0292 | 153.2545 |
| 163.8954  | 198.0283 | 220.8406 |
| 233.2285  | 251.1545 | 256.2254 |
| 275.3994  | 276.4806 | 289.3540 |
| 306.6957  | 328.1180 | 336.9331 |
| 368.3047  | 378.0900 | 405.1211 |

|           |           |           |
|-----------|-----------|-----------|
| 422.4768  | 435.0830  | 454.5010  |
| 492.9811  | 520.6466  | 532.3403  |
| 576.1710  | 615.5932  | 648.6171  |
| 702.3410  | 727.4815  | 738.8015  |
| 753.2283  | 806.8826  | 816.9710  |
| 820.2180  | 853.0678  | 865.3612  |
| 877.9839  | 898.3019  | 924.1479  |
| 924.7050  | 929.0510  | 943.4747  |
| 948.3435  | 953.9542  | 984.4455  |
| 996.9135  | 999.1452  | 1010.9543 |
| 1013.2527 | 1023.7390 | 1033.0904 |
| 1052.0548 | 1080.3460 | 1099.1350 |
| 1106.1757 | 1141.9236 | 1150.5308 |
| 1159.2398 | 1186.5889 | 1202.9790 |
| 1210.1036 | 1227.9592 | 1233.1579 |
| 1247.3625 | 1258.5056 | 1276.9042 |
| 1282.2135 | 1306.8470 | 1317.0010 |
| 1327.6527 | 1341.0128 | 1353.5101 |
| 1358.6916 | 1380.0922 | 1381.2003 |
| 1396.4184 | 1404.5124 | 1410.7251 |
| 1420.6291 | 1425.5810 | 1449.3102 |
| 1476.9865 | 1485.8985 | 1487.1854 |
| 1488.8444 | 1495.0977 | 1499.3480 |
| 1500.4952 | 1508.0863 | 1510.0371 |
| 1511.3678 | 1516.1944 | 1691.8473 |
| 3009.1357 | 3013.0184 | 3013.7593 |
| 3022.4120 | 3028.0262 | 3036.1557 |
| 3042.2378 | 3050.9503 | 3051.8607 |
| 3055.5878 | 3058.0536 | 3067.3627 |
| 3076.0012 | 3077.1199 | 3080.1490 |
| 3080.8819 | 3088.0069 | 3092.1201 |
| 3106.0179 | 3113.8794 | 3122.7270 |
| 3136.6957 | 3154.2057 | 3215.9912 |

Zero-point correction (Hartree): 0.367151

**TS17a: B3LYP/6-311G\*\***

TS-rp-Dio-1a-B3LYP

-----

E(UB+HF-LYP/6-311G(d,p)) (Hartree): -811.734898946

Electronic state : 1-A

Cartesian coordinates (Angs):

|   |           |           |           |
|---|-----------|-----------|-----------|
| C | 1.524176  | -0.040182 | 0.005028  |
| C | 0.645601  | -1.265887 | 0.378101  |
| C | 2.730830  | -1.015117 | -0.187974 |
| C | 1.727004  | -2.205340 | -0.280095 |
| C | 1.428861  | -2.577862 | -1.736468 |
| C | 2.084597  | -3.452389 | 0.525196  |
| C | 1.708330  | 1.143373  | 0.919296  |
| C | 2.440741  | 2.333502  | 0.324317  |
| C | 1.699756  | 2.996944  | -0.866222 |
| C | 1.285950  | 1.176940  | 2.184986  |
| C | 0.289782  | 3.389152  | -0.496106 |
| C | -1.703345 | -0.342452 | 0.664495  |
| C | -0.804478 | -1.310879 | -0.107232 |
| C | -3.324631 | 0.304755  | -1.261016 |
| H | 1.203908  | 0.319607  | -0.978317 |
| H | 0.672961  | -1.435020 | 1.459573  |
| H | 3.342732  | -1.066893 | 0.716125  |
| H | 3.381031  | -0.848301 | -1.050532 |
| H | 2.297777  | -3.075111 | -2.178994 |

|                                          |           |           |           |  |
|------------------------------------------|-----------|-----------|-----------|--|
| H                                        | 1.203951  | -1.702387 | -2.351632 |  |
| H                                        | 0.580871  | -3.265146 | -1.809592 |  |
| H                                        | 2.954518  | -3.961248 | 0.096337  |  |
| H                                        | 1.254353  | -4.166753 | 0.533099  |  |
| H                                        | 2.321535  | -3.201177 | 1.563022  |  |
| H                                        | 3.430081  | 2.024743  | -0.032348 |  |
| H                                        | 2.610194  | 3.079376  | 1.106257  |  |
| H                                        | 1.655238  | 2.338564  | -1.735285 |  |
| H                                        | 2.246646  | 3.903171  | -1.153913 |  |
| H                                        | 1.461672  | 2.042557  | 2.814927  |  |
| H                                        | 0.754821  | 0.350921  | 2.641161  |  |
| H                                        | 0.207208  | 4.142209  | 0.318766  |  |
| H                                        | -1.756740 | -0.624994 | 1.717656  |  |
| H                                        | -1.343801 | 0.686557  | 0.603676  |  |
| H                                        | -1.198199 | -2.326570 | 0.004548  |  |
| H                                        | -0.831540 | -1.076873 | -1.175434 |  |
| H                                        | -2.887619 | 1.304328  | -1.257582 |  |
| H                                        | -4.382480 | 0.354385  | -1.515348 |  |
| H                                        | -2.805921 | -0.323564 | -1.986605 |  |
| C                                        | -3.191110 | -0.317790 | 0.151027  |  |
| O                                        | -3.768346 | -1.538302 | 0.246714  |  |
| O                                        | -3.982447 | 0.311518  | 1.053688  |  |
| O                                        | -0.702406 | 2.930159  | -1.007097 |  |
| Rotational constants (GHz):              | 0.4107700 | 0.3282900 | 0.2201800 |  |
| Vibrational harmonic frequencies (cm-1): |           |           |           |  |
| -517.2389                                | 19.7153   |           | 36.0768   |  |
| 41.1000                                  | 46.0961   |           | 60.3697   |  |
| 79.4789                                  | 82.6571   |           | 113.6094  |  |
| 118.6447                                 | 142.5392  |           | 171.3879  |  |
| 206.1594                                 | 208.5237  |           | 220.8622  |  |
| 236.4661                                 | 243.5285  |           | 277.2686  |  |
| 280.4605                                 | 313.2449  |           | 336.9777  |  |
| 344.6526                                 | 367.9858  |           | 378.0460  |  |
| 391.2446                                 | 421.9835  |           | 456.1719  |  |
| 463.4943                                 | 491.2851  |           | 503.8764  |  |
| 545.1781                                 | 564.1145  |           | 642.8082  |  |
| 707.3626                                 | 728.6146  |           | 749.9948  |  |
| 777.5925                                 | 797.4488  |           | 846.5670  |  |
| 868.1941                                 | 871.3895  |           | 891.1509  |  |
| 896.8497                                 | 926.6685  |           | 930.1274  |  |
| 935.1156                                 | 952.4788  |           | 956.3536  |  |
| 989.4020                                 | 1003.0513 |           | 1012.8158 |  |
| 1024.7624                                | 1029.4522 |           | 1038.0551 |  |
| 1044.1068                                | 1052.7705 |           | 1074.2709 |  |
| 1079.9754                                | 1089.1191 |           | 1114.5919 |  |
| 1147.6131                                | 1178.7111 |           | 1190.2255 |  |
| 1205.4692                                | 1211.6582 |           | 1220.6379 |  |
| 1224.9883                                | 1255.8309 |           | 1263.2163 |  |
| 1266.9191                                | 1286.2445 |           | 1302.5662 |  |
| 1327.0186                                | 1338.2531 |           | 1348.5280 |  |
| 1355.7370                                | 1379.8098 |           | 1382.5720 |  |
| 1404.2924                                | 1415.1634 |           | 1420.9849 |  |
| 1423.5384                                | 1453.1791 |           | 1472.3229 |  |
| 1473.0313                                | 1476.4669 |           | 1484.5392 |  |
| 1485.9034                                | 1487.0297 |           | 1488.1578 |  |
| 1495.4500                                | 1500.3034 |           | 1508.9382 |  |
| 1510.5403                                | 1700.3582 |           | 1804.6152 |  |
| 2870.7963                                | 3011.2602 |           | 3018.9473 |  |
| 3020.2367                                | 3026.5849 |           | 3028.7775 |  |
| 3029.1396                                | 3036.9743 |           | 3040.7428 |  |
| 3047.7616                                | 3061.8252 |           | 3063.5853 |  |



|           |           |           |
|-----------|-----------|-----------|
| 3068.7192 | 3071.2022 | 3080.5486 |
| 3081.0411 | 3088.3137 | 3093.3585 |
| 3101.9138 | 3118.2483 | 3131.9791 |
| 3138.1590 | 3147.4785 | 3218.8079 |

Zero-point correction (Hartree): 0.359225

**TS17b: B3LYP/6-311G\*\***

TS-rp-Dio-1b-B3LYP

-----  
E(UB+HF-LYP/6-311G(d,p)) (Hartree): -811.732283041

Electronic state : 1-A

Cartesian coordinates (Angs):

|   |           |           |           |
|---|-----------|-----------|-----------|
| C | 0.997958  | -1.163015 | 0.549106  |
| C | 1.592813  | -0.105828 | -0.439579 |
| C | 2.351010  | -1.922838 | 0.445590  |
| C | 3.033113  | -0.620573 | -0.079335 |
| C | 3.707424  | 0.165311  | 1.050656  |
| C | 3.988492  | -0.782465 | -1.259216 |
| C | -0.322553 | -1.838548 | 0.244773  |
| C | -1.426802 | -1.525972 | 1.237410  |
| C | -2.831278 | -2.043087 | 0.902268  |
| C | -0.488541 | -2.630901 | -0.816739 |
| C | -3.460659 | -1.344093 | -0.284285 |
| C | -0.214625 | 1.615729  | -0.813038 |
| C | 1.201275  | 1.361223  | -0.270532 |
| C | -0.375943 | 4.129443  | -0.166971 |
| H | 0.931006  | -0.701810 | 1.539501  |
| H | 1.369829  | -0.427544 | -1.463374 |
| H | 2.321169  | -2.699204 | -0.321988 |
| H | 2.742693  | -2.356643 | 1.369142  |
| H | 4.608132  | -0.358168 | 1.386100  |
| H | 3.055650  | 0.286234  | 1.919746  |
| H | 4.010229  | 1.163056  | 0.717927  |
| H | 4.900822  | -1.307439 | -0.956427 |
| H | 4.287939  | 0.190876  | -1.663436 |
| H | 3.526993  | -1.354364 | -2.069363 |
| H | -1.471193 | -0.437905 | 1.382599  |
| H | -1.125552 | -1.923519 | 2.215017  |
| H | -3.483883 | -1.832874 | 1.760533  |
| H | -2.854450 | -3.121639 | 0.732321  |
| H | -1.435585 | -3.095073 | -1.060007 |
| H | 0.330054  | -2.839480 | -1.497457 |
| H | -3.361491 | -0.234410 | -0.274195 |
| H | -0.206156 | 1.917287  | -1.863729 |
| H | -0.825891 | 0.717682  | -0.735954 |
| H | 1.921781  | 2.008070  | -0.783157 |
| H | 1.244819  | 1.620486  | 0.791958  |
| H | -0.969966 | 4.837111  | 0.409410  |
| H | -0.377603 | 4.416928  | -1.219697 |
| H | 0.646804  | 4.113277  | 0.212130  |
| C | -1.002798 | 2.722170  | -0.021133 |
| O | -1.174864 | 2.355132  | 1.272307  |
| O | -2.311308 | 2.710646  | -0.370957 |
| O | -4.048762 | -1.900812 | -1.176532 |

Rotational constants (GHz): 0.4169800 0.3186700 0.2072100

Vibrational harmonic frequencies (cm-1):

|           |          |          |
|-----------|----------|----------|
| -503.6722 | 18.1973  | 34.0877  |
| 37.2037   | 40.2048  | 63.6670  |
| 78.5237   | 84.4809  | 119.1224 |
| 139.2773  | 157.1467 | 186.9050 |

|           |           |           |
|-----------|-----------|-----------|
| 202.8252  | 218.1725  | 233.8287  |
| 240.0575  | 252.1443  | 258.7079  |
| 269.9354  | 298.1505  | 337.7701  |
| 350.9615  | 356.0506  | 363.7435  |
| 402.2089  | 413.9304  | 432.5089  |
| 467.4015  | 506.0689  | 511.6796  |
| 548.6340  | 572.5508  | 615.6424  |
| 700.3034  | 707.0917  | 744.7087  |
| 770.6627  | 780.6653  | 851.4532  |
| 869.3342  | 881.1176  | 886.5890  |
| 905.5522  | 921.9323  | 925.1047  |
| 930.2545  | 952.3713  | 958.8254  |
| 988.3865  | 1010.9263 | 1019.1477 |
| 1024.0445 | 1029.0102 | 1041.8429 |
| 1050.0559 | 1055.4885 | 1078.6056 |
| 1087.6495 | 1096.7299 | 1108.3542 |
| 1139.1350 | 1174.3113 | 1194.7296 |
| 1205.2189 | 1212.3151 | 1222.4269 |
| 1227.9911 | 1248.7122 | 1257.8823 |
| 1274.8956 | 1288.5289 | 1295.4921 |
| 1320.6890 | 1342.7839 | 1352.9882 |
| 1376.2715 | 1386.2460 | 1396.1230 |
| 1401.9806 | 1416.7707 | 1422.1763 |
| 1422.7174 | 1449.8557 | 1470.2246 |
| 1472.8775 | 1474.9633 | 1481.8148 |
| 1485.4967 | 1487.1271 | 1490.0244 |
| 1494.8530 | 1499.0940 | 1506.8926 |
| 1508.6848 | 1703.4879 | 1810.3725 |
| 2857.1927 | 2998.5822 | 3008.7726 |
| 3011.5985 | 3016.5834 | 3020.6767 |
| 3022.8888 | 3022.9625 | 3037.2473 |
| 3045.6471 | 3048.4198 | 3054.5949 |
| 3065.6701 | 3067.1805 | 3078.1337 |
| 3079.2456 | 3091.3659 | 3091.8316 |
| 3099.3845 | 3127.1824 | 3131.2440 |
| 3141.4925 | 3148.2841 | 3223.0359 |

Zero-point correction (Hartree): 0.359024

**TS18: B3LYP/6-311G\*\***

TS-13Hs-CI2a

E(RB+HF-LYP/6-311G(d,p)) (Hartree): -811.696741106

Electronic state : 1-A

Cartesian coordinates (Angs):

|   |           |           |           |
|---|-----------|-----------|-----------|
| C | -1.124165 | -0.760040 | -0.330525 |
| C | -1.957338 | 0.277193  | 0.473143  |
| C | -2.337802 | -1.739035 | -0.237961 |
| C | -3.259497 | -0.528420 | 0.104343  |
| C | -3.985137 | -0.002212 | -1.139291 |
| C | -4.249541 | -0.737674 | 1.248137  |
| C | 0.231150  | -1.233770 | 0.137813  |
| C | 1.083358  | -1.813402 | -0.974023 |
| C | 2.527105  | -2.214120 | -0.603711 |
| C | 0.626894  | -1.175047 | 1.411699  |
| C | 3.360666  | -1.004573 | -0.371688 |
| C | -0.539464 | 2.433765  | 0.562003  |
| C | -1.855460 | 1.765594  | 0.142774  |
| C | 1.965925  | 2.809575  | 0.052928  |
| H | -1.024874 | -0.400282 | -1.356985 |
| H | -1.782712 | 0.140897  | 1.546223  |

|                                          |           |           |           |
|------------------------------------------|-----------|-----------|-----------|
| H                                        | -2.232948 | -2.421395 | 0.609488  |
| H                                        | -2.587602 | -2.316381 | -1.132065 |
| H                                        | -4.758600 | -0.711899 | -1.450222 |
| H                                        | -3.308153 | 0.139604  | -1.985593 |
| H                                        | -4.475360 | 0.955751  | -0.940706 |
| H                                        | -5.034227 | -1.447675 | 0.965382  |
| H                                        | -4.739785 | 0.202792  | 1.523208  |
| H                                        | -3.749999 | -1.128918 | 2.139199  |
| H                                        | 1.123909  | -1.079487 | -1.786213 |
| H                                        | 0.576606  | -2.694334 | -1.385961 |
| H                                        | 2.969508  | -2.716314 | -1.473323 |
| H                                        | 2.563436  | -2.907256 | 0.242244  |
| H                                        | 1.589588  | -1.538020 | 1.746669  |
| H                                        | -0.008992 | -0.758927 | 2.183495  |
| H                                        | 3.949225  | 0.211073  | -0.588812 |
| H                                        | -0.679677 | 3.519725  | 0.653117  |
| H                                        | -0.217827 | 2.108050  | 1.559309  |
| H                                        | -2.678701 | 2.284941  | 0.647348  |
| H                                        | -1.994386 | 1.920466  | -0.930411 |
| H                                        | 1.855460  | 3.628562  | 0.766887  |
| H                                        | 2.530816  | 3.143907  | -0.818184 |
| H                                        | 2.550239  | 2.018886  | 0.537650  |
| C                                        | 0.630731  | 2.249810  | -0.396740 |
| O                                        | 0.507440  | 1.701279  | -1.472173 |
| O                                        | 4.620082  | 0.427618  | 0.529648  |
| O                                        | 3.980040  | -0.893849 | 0.724382  |
| Rotational constants (GHz):              |           |           |           |
|                                          | 0.6328800 | 0.2580200 | 0.2101300 |
| Vibrational harmonic frequencies (cm-1): |           |           |           |
| -1729.1878                               | 15.7234   | 34.2286   |           |
| 41.6139                                  | 59.0608   | 82.0196   |           |
| 87.7201                                  | 98.1003   | 101.3964  |           |
| 125.5476                                 | 146.0231  | 165.7340  |           |
| 185.8439                                 | 196.2352  | 216.5952  |           |
| 233.1603                                 | 255.5673  | 268.7270  |           |
| 278.9102                                 | 294.5741  | 296.4674  |           |
| 359.4567                                 | 370.4692  | 378.1259  |           |
| 415.6588                                 | 441.5721  | 467.7213  |           |
| 479.9912                                 | 502.2789  | 518.2253  |           |
| 560.0272                                 | 597.7325  | 607.9249  |           |
| 652.3025                                 | 722.8241  | 734.0345  |           |
| 751.6476                                 | 773.7964  | 799.7937  |           |
| 835.5832                                 | 854.5586  | 883.6248  |           |
| 903.8028                                 | 918.0337  | 924.7337  |           |
| 946.0105                                 | 955.2554  | 961.1044  |           |
| 963.9504                                 | 988.4068  | 998.4741  |           |
| 1023.3434                                | 1027.2153 | 1032.4767 |           |
| 1042.9170                                | 1057.2087 | 1117.8282 |           |
| 1120.7474                                | 1129.1217 | 1161.1855 |           |
| 1171.7205                                | 1174.8602 | 1199.9838 |           |
| 1210.6504                                | 1213.9662 | 1222.1831 |           |
| 1233.4515                                | 1243.2045 | 1261.1348 |           |
| 1273.8479                                | 1279.5103 | 1317.1459 |           |
| 1338.4894                                | 1347.6737 | 1377.6207 |           |
| 1387.3220                                | 1393.3779 | 1397.2942 |           |
| 1402.1645                                | 1418.0795 | 1422.2505 |           |
| 1448.4873                                | 1451.0418 | 1464.0984 |           |
| 1475.8741                                | 1476.9249 | 1477.6289 |           |
| 1484.0393                                | 1487.3650 | 1489.4459 |           |
| 1496.2256                                | 1507.0058 | 1511.8947 |           |
| 1514.3298                                | 1703.0414 | 1778.6066 |           |
| 2086.5390                                | 3001.6589 | 3008.8423 |           |

|           |           |           |
|-----------|-----------|-----------|
| 3014.5177 | 3018.6962 | 3020.0454 |
| 3021.7867 | 3024.4473 | 3026.8807 |
| 3035.2893 | 3036.5250 | 3051.6047 |
| 3065.7378 | 3066.6324 | 3071.9693 |
| 3076.2870 | 3078.8352 | 3079.9077 |
| 3089.4681 | 3091.4794 | 3093.6854 |
| 3127.6345 | 3155.9650 | 3229.5586 |

Zero-point correction (Hartree): 0.357190

**TS19a: B3LYP/6-311G\*\***

TS-rp-Dio-2a-B3LYP

-----  
E(UB+HF-LYP/6-311G(d,p)) (Hartree): -811.737801247

Electronic state : 1-A

Cartesian coordinates (Angs):

|   |           |           |           |
|---|-----------|-----------|-----------|
| C | 1.109934  | -1.049057 | 0.600519  |
| C | 1.681364  | 0.018150  | -0.395623 |
| C | 2.455107  | -1.814229 | 0.446661  |
| C | 3.126818  | -0.506536 | -0.076700 |
| C | 3.831671  | 0.261256  | 1.047670  |
| C | 4.053157  | -0.653890 | -1.281558 |
| C | -0.221887 | -1.709487 | 0.329318  |
| C | -1.296674 | -1.432108 | 1.364041  |
| C | -2.753113 | -1.633721 | 0.948566  |
| C | -0.419903 | -2.483038 | -0.747400 |
| C | -3.182556 | -0.627173 | -0.148383 |
| C | -0.100325 | 1.808909  | -0.805101 |
| C | 1.303678  | 1.484679  | -0.209657 |
| C | -0.557974 | 4.226489  | 0.008345  |
| H | 1.078005  | -0.598846 | 1.597388  |
| H | 1.430495  | -0.294059 | -1.415454 |
| H | 2.400821  | -2.578076 | -0.332036 |
| H | 2.869192  | -2.265083 | 1.352170  |
| H | 4.738597  | -0.269591 | 1.353563  |
| H | 3.202329  | 0.372483  | 1.934533  |
| H | 4.129823  | 1.262489  | 0.721564  |
| H | 4.971023  | -1.185780 | -1.009226 |
| H | 4.345501  | 0.324558  | -1.678599 |
| H | 3.569934  | -1.211874 | -2.088774 |
| H | -1.176353 | -0.401614 | 1.717522  |
| H | -1.088308 | -2.062002 | 2.241216  |
| H | -3.411312 | -1.462183 | 1.805617  |
| H | -2.952442 | -2.638242 | 0.569786  |
| H | -1.365169 | -2.960946 | -0.959767 |
| H | 0.372260  | -2.654886 | -1.468312 |
| H | -3.001900 | 0.404869  | 0.224830  |
| H | 0.019371  | 2.249708  | -1.799377 |
| H | -0.688238 | 0.897824  | -0.920416 |
| H | 2.056603  | 2.125803  | -0.680294 |
| H | 1.323878  | 1.723831  | 0.859156  |
| H | -1.054180 | 4.767357  | 0.812948  |
| H | -0.902570 | 4.614975  | -0.956157 |
| H | 0.522486  | 4.393028  | 0.050391  |
| C | -0.883028 | 2.749154  | 0.093141  |
| O | -1.720513 | 2.331626  | 0.868711  |
| O | -4.441438 | -0.776179 | -0.622558 |
| O | -2.621481 | -0.854216 | -1.368066 |

Rotational constants (GHz): 0.4967400 0.2971000 0.2146600

Vibrational harmonic frequencies (cm-1):

|            |         |         |
|------------|---------|---------|
| -1153.1442 | 27.8873 | 33.2145 |
|------------|---------|---------|

|           |           |           |
|-----------|-----------|-----------|
| 37.7353   | 53.2927   | 59.4255   |
| 86.0695   | 88.3798   | 96.8456   |
| 118.2763  | 129.5782  | 157.6979  |
| 188.1942  | 213.9155  | 225.5657  |
| 239.0443  | 249.5725  | 264.4005  |
| 270.6082  | 279.1054  | 301.2916  |
| 349.8935  | 377.9441  | 385.7333  |
| 434.4263  | 448.9906  | 474.5958  |
| 491.7544  | 529.1645  | 543.6692  |
| 564.7136  | 607.2541  | 611.2654  |
| 683.6290  | 742.6958  | 781.5450  |
| 795.0723  | 808.1971  | 845.3106  |
| 868.0205  | 881.4281  | 905.4039  |
| 906.8533  | 917.8507  | 938.8322  |
| 954.2129  | 966.8730  | 974.9008  |
| 979.6004  | 993.8015  | 1017.1942 |
| 1019.4352 | 1029.2194 | 1050.6795 |
| 1054.0183 | 1059.1261 | 1062.8194 |
| 1111.8132 | 1125.1444 | 1163.2664 |
| 1179.5885 | 1187.6718 | 1204.9021 |
| 1211.8844 | 1219.3469 | 1224.8476 |
| 1236.7781 | 1241.5835 | 1259.6396 |
| 1267.6746 | 1278.6722 | 1296.0093 |
| 1306.6071 | 1328.1246 | 1330.8301 |
| 1359.0988 | 1384.3554 | 1391.8661 |
| 1401.8226 | 1403.9380 | 1417.4323 |
| 1424.1470 | 1448.5790 | 1462.5725 |
| 1468.0145 | 1476.5595 | 1485.3568 |
| 1486.0652 | 1489.0123 | 1493.0427 |
| 1499.6760 | 1505.1534 | 1507.1543 |
| 1509.8168 | 1664.8631 | 1769.3331 |
| 2804.5486 | 2987.7094 | 3009.1698 |
| 3016.7918 | 3022.7683 | 3024.0622 |
| 3027.4275 | 3033.8240 | 3040.2178 |
| 3043.4874 | 3045.2265 | 3048.3115 |
| 3058.1490 | 3067.0879 | 3078.4107 |
| 3079.5612 | 3084.5621 | 3090.8799 |
| 3098.5011 | 3101.4907 | 3110.9066 |
| 3140.2687 | 3146.4975 | 3238.7844 |

Zero-point correction (Hartree): 0.359488

**TS19b: B3LYP/6-311G\*\***

TS-rp-Dio-2b-B3LYP

-----  
E(UB+HF-LYP/6-311G(d,p)) (Hartree): -811.736760107

Electronic state : 1-A

Cartesian coordinates (Angs):

|   |           |           |           |
|---|-----------|-----------|-----------|
| C | -0.857131 | -0.810600 | -0.153285 |
| C | -1.921118 | 0.203786  | 0.366592  |
| C | -2.009484 | -1.846846 | -0.371546 |
| C | -3.053149 | -0.697598 | -0.262157 |
| C | -3.529058 | -0.241252 | -1.646502 |
| C | -4.250240 | -0.964106 | 0.648363  |
| C | 0.305929  | -1.287865 | 0.682232  |
| C | 1.321756  | -2.139977 | -0.052457 |
| C | 2.254689  | -1.350557 | -0.989781 |
| C | 0.439491  | -1.038585 | 1.986006  |
| C | 3.269624  | -0.487025 | -0.202339 |
| C | -0.868356 | 2.576056  | 0.721748  |
| C | -1.881823 | 1.681064  | -0.030791 |

|                                          |           |           |           |
|------------------------------------------|-----------|-----------|-----------|
| C                                        | 1.019974  | 2.856458  | -1.044902 |
| H                                        | -0.489220 | -0.478589 | -1.130949 |
| H                                        | -2.000178 | 0.132995  | 1.455969  |
| H                                        | -2.072140 | -2.543248 | 0.467987  |
| H                                        | -2.001872 | -2.415424 | -1.304754 |
| H                                        | -4.165361 | -1.012517 | -2.091683 |
| H                                        | -2.697293 | -0.067580 | -2.334911 |
| H                                        | -4.117617 | 0.679443  | -1.590954 |
| H                                        | -4.911354 | -1.723296 | 0.216980  |
| H                                        | -4.844469 | -0.055561 | 0.796526  |
| H                                        | -3.929022 | -1.319788 | 1.631422  |
| H                                        | 0.800810  | -2.888236 | -0.662744 |
| H                                        | 1.932259  | -2.695771 | 0.664244  |
| H                                        | 1.694884  | -0.683207 | -1.651327 |
| H                                        | 2.840494  | -2.028103 | -1.614550 |
| H                                        | 1.274808  | -1.438719 | 2.550051  |
| H                                        | -0.252771 | -0.412933 | 2.534701  |
| H                                        | 2.735396  | 0.214125  | 0.473365  |
| H                                        | -1.129361 | 3.622269  | 0.520563  |
| H                                        | -0.942967 | 2.412859  | 1.799019  |
| H                                        | -2.876350 | 2.100358  | 0.160467  |
| H                                        | -1.725496 | 1.776327  | -1.110073 |
| H                                        | 0.326122  | 2.537305  | -1.826244 |
| H                                        | 2.025349  | 2.497799  | -1.263297 |
| H                                        | 1.028215  | 3.952057  | -1.055087 |
| C                                        | 0.590517  | 2.384604  | 0.333018  |
| O                                        | 1.390012  | 1.908241  | 1.110847  |
| O                                        | 4.184072  | 0.129756  | -0.992857 |
| O                                        | 4.239342  | -1.186487 | 0.439521  |
| Rotational constants (GHz):              |           |           |           |
|                                          | 0.5910900 | 0.2750700 | 0.2239700 |
| Vibrational harmonic frequencies (cm-1): |           |           |           |
| -1448.7506                               | 21.5035   | 32.2571   |           |
| 42.3991                                  | 54.6666   | 65.5955   |           |
| 76.0909                                  | 87.8610   | 103.4320  |           |
| 109.9813                                 | 118.8134  | 130.2956  |           |
| 182.1104                                 | 191.9275  | 228.7609  |           |
| 240.7109                                 | 266.3580  | 275.8298  |           |
| 286.5858                                 | 315.1598  | 344.9789  |           |
| 364.2230                                 | 383.5186  | 392.8583  |           |
| 427.3416                                 | 435.0361  | 459.9150  |           |
| 486.3346                                 | 500.8889  | 531.7167  |           |
| 561.7491                                 | 593.3978  | 647.5937  |           |
| 718.1842                                 | 727.3092  | 759.2714  |           |
| 789.2210                                 | 802.8062  | 845.4033  |           |
| 856.3871                                 | 877.8962  | 897.9089  |           |
| 923.4882                                 | 932.8169  | 935.8272  |           |
| 949.2069                                 | 965.9464  | 972.1984  |           |
| 984.5814                                 | 992.3102  | 1008.1846 |           |
| 1018.4294                                | 1028.6996 | 1040.5899 |           |
| 1047.0027                                | 1048.8864 | 1070.1771 |           |
| 1110.2594                                | 1115.2929 | 1150.7214 |           |
| 1170.7515                                | 1185.0633 | 1197.8450 |           |
| 1207.0640                                | 1222.8576 | 1226.8433 |           |
| 1238.2944                                | 1254.6163 | 1257.0137 |           |
| 1260.0526                                | 1265.0766 | 1278.4748 |           |
| 1313.8533                                | 1334.5551 | 1338.7600 |           |
| 1348.1026                                | 1362.4066 | 1382.2434 |           |
| 1387.3713                                | 1401.4312 | 1409.9445 |           |
| 1419.8293                                | 1452.5238 | 1465.6066 |           |
| 1474.0480                                | 1476.8180 | 1481.2334 |           |
| 1484.5880                                | 1486.9421 | 1487.6216 |           |

|           |           |           |
|-----------|-----------|-----------|
| 1492.0253 | 1497.3616 | 1507.7511 |
| 1509.5811 | 1696.6449 | 1777.2470 |
| 2788.4563 | 3009.3664 | 3012.0134 |
| 3012.3861 | 3014.6454 | 3019.6924 |
| 3024.2639 | 3031.2102 | 3037.8325 |
| 3043.0017 | 3046.9389 | 3057.0323 |
| 3067.4991 | 3070.3969 | 3079.1409 |
| 3081.0495 | 3085.9275 | 3089.9834 |
| 3092.2638 | 3095.8492 | 3100.8314 |
| 3138.1455 | 3143.9143 | 3223.4829 |

Zero-point correction (Hartree): 0.359146

## TS20

-----  
E(RB+HF-LYP/6-311G(d,p)) (Hartree): -811.740494599

Electronic state : 1-A

Cartesian coordinates (Angs):

|   |           |           |           |
|---|-----------|-----------|-----------|
| C | -1.442509 | 0.774832  | 0.293384  |
| C | -1.372939 | -0.580401 | -0.513368 |
| C | -2.956079 | 0.510150  | 0.511601  |
| C | -2.766052 | -0.977302 | 0.103674  |
| C | -2.674900 | -1.888607 | 1.334108  |
| C | -3.782296 | -1.533264 | -0.892659 |
| C | -1.018147 | 2.093702  | -0.319194 |
| C | 0.444375  | 2.326589  | -0.650406 |
| C | 1.411997  | 2.367294  | 0.554895  |
| C | -1.893311 | 3.079766  | -0.541314 |
| C | 2.511327  | 1.310084  | 0.554833  |
| C | -0.225969 | -1.575490 | -0.321312 |
| C | 3.501834  | -2.108485 | -0.761690 |
| H | -0.896625 | 0.633510  | 1.231474  |
| H | -1.508734 | -0.373327 | -1.581905 |
| H | -3.574559 | 1.038565  | -0.216134 |
| H | -3.353614 | 0.701171  | 1.511645  |
| H | -3.656289 | -1.955348 | 1.814714  |
| H | -1.970381 | -1.508783 | 2.078456  |
| H | -2.368653 | -2.905004 | 1.068083  |
| H | -4.771965 | -1.629533 | -0.432902 |
| H | -3.486551 | -2.526706 | -1.248339 |
| H | -3.880382 | -0.879876 | -1.764360 |
| H | 0.515334  | 3.270994  | -1.194255 |
| H | 0.808666  | 1.569809  | -1.349083 |
| H | 0.882407  | 2.312790  | 1.509812  |
| H | 1.936983  | 3.330207  | 0.566358  |
| H | -1.570299 | 4.029209  | -0.955329 |
| H | -2.947942 | 2.992121  | -0.313547 |
| H | 3.207228  | 1.410544  | 1.402852  |
| H | -0.561966 | -2.554125 | -0.682051 |
| H | -0.027712 | -1.687006 | 0.742929  |
| H | 3.846161  | -1.633039 | -1.682774 |
| H | 3.195094  | -3.131131 | -1.004250 |
| H | 4.312875  | -2.121221 | -0.036042 |
| C | 2.339553  | -1.329573 | -0.247389 |
| O | 2.374448  | -1.144061 | 1.029482  |
| O | 1.539641  | -0.094625 | 1.441076  |
| O | 2.917768  | 0.760349  | -0.503233 |
| C | 1.083216  | -1.214985 | -1.070963 |
| H | 1.222441  | -1.873525 | -1.933180 |
| H | 1.033023  | -0.209462 | -1.475978 |

Rotational constants (GHz): 0.5913400 0.3375300 0.2517400

Vibrational harmonic frequencies (cm-1):

|           |           |           |
|-----------|-----------|-----------|
| -327.9013 | 37.9924   | 58.9999   |
| 69.1712   | 118.1627  | 133.0030  |
| 160.4840  | 162.0696  | 171.3577  |
| 190.1639  | 211.5825  | 222.8438  |
| 235.1125  | 252.0095  | 272.3537  |
| 281.5498  | 290.8177  | 299.4159  |
| 324.9443  | 350.9033  | 372.4338  |
| 379.6325  | 406.8975  | 418.5650  |
| 438.7693  | 492.2020  | 500.4345  |
| 508.5443  | 546.0218  | 564.4595  |
| 617.5428  | 630.0744  | 672.8380  |
| 697.7662  | 744.9692  | 767.5064  |
| 796.6253  | 813.8560  | 870.0809  |
| 886.4115  | 904.6848  | 912.7524  |
| 922.4245  | 924.9980  | 930.3502  |
| 950.6085  | 957.9698  | 971.8376  |
| 992.5930  | 1004.1724 | 1012.6447 |
| 1026.5658 | 1035.1381 | 1043.1393 |
| 1049.1201 | 1061.8821 | 1092.3885 |
| 1102.4138 | 1131.3090 | 1160.0904 |
| 1191.7234 | 1202.2549 | 1212.6045 |
| 1218.6497 | 1222.7577 | 1231.6437 |
| 1252.9805 | 1269.5886 | 1280.2527 |
| 1291.1360 | 1318.5035 | 1334.9311 |
| 1344.3841 | 1354.8749 | 1372.3436 |
| 1375.2773 | 1382.7457 | 1399.1514 |
| 1402.7918 | 1409.5632 | 1418.6923 |
| 1429.9793 | 1452.0836 | 1470.0801 |
| 1472.9185 | 1477.9149 | 1482.1574 |
| 1486.7099 | 1489.9528 | 1496.0139 |
| 1504.8165 | 1506.9231 | 1511.2409 |
| 1512.6064 | 1549.9269 | 1687.2968 |
| 2958.6442 | 3006.5895 | 3010.1333 |
| 3017.5062 | 3021.6256 | 3023.4134 |
| 3035.9649 | 3040.9469 | 3044.7801 |
| 3054.8784 | 3056.1320 | 3063.8624 |
| 3071.4156 | 3074.9939 | 3079.6253 |
| 3082.9289 | 3090.8754 | 3096.8208 |
| 3102.3337 | 3122.3976 | 3137.3545 |
| 3150.1107 | 3151.2150 | 3217.8097 |

Zero-point correction (Hartree): 0.364246

**TS21**

-----  
 E(RB+HF-LYP/6-311G(d,p)) (Hartree): -811.742556552

Electronic state : 1-A

Cartesian coordinates (Angs):

|   |           |           |           |
|---|-----------|-----------|-----------|
| C | -1.283787 | 0.863192  | 0.336742  |
| C | -1.452395 | -0.479300 | -0.478783 |
| C | -2.822222 | 0.881282  | 0.536995  |
| C | -2.902916 | -0.613103 | 0.127428  |
| C | -2.995032 | -1.521615 | 1.360060  |
| C | -3.993458 | -0.977867 | -0.878872 |
| C | -0.632111 | 2.087307  | -0.271642 |
| C | 0.826509  | 2.043419  | -0.691787 |
| C | 1.874723  | 2.156231  | 0.443274  |
| C | -1.305041 | 3.233280  | -0.421185 |
| C | 2.272320  | 0.860265  | 1.121847  |
| C | -0.560266 | -1.717376 | -0.308184 |



|                                          |           |           |           |
|------------------------------------------|-----------|-----------|-----------|
| C                                        | 2.638776  | -2.361527 | 0.531857  |
| H                                        | -0.772441 | 0.626584  | 1.272429  |
| H                                        | -1.546339 | -0.245221 | -1.546090 |
| H                                        | -3.323979 | 1.516057  | -0.195928 |
| H                                        | -3.191651 | 1.138939  | 1.532922  |
| H                                        | -3.973451 | -1.393793 | 1.834279  |
| H                                        | -2.235401 | -1.281247 | 2.108564  |
| H                                        | -2.892591 | -2.579912 | 1.101552  |
| H                                        | -4.987717 | -0.902726 | -0.425258 |
| H                                        | -3.874090 | -2.006062 | -1.239453 |
| H                                        | -3.970460 | -0.313106 | -1.747137 |
| H                                        | 0.995964  | 2.884959  | -1.368172 |
| H                                        | 1.028026  | 1.144917  | -1.274381 |
| H                                        | 1.490477  | 2.818056  | 1.232372  |
| H                                        | 2.784321  | 2.626493  | 0.063102  |
| H                                        | -0.825387 | 4.111327  | -0.841536 |
| H                                        | -2.339340 | 3.350988  | -0.123353 |
| H                                        | 3.090988  | 0.955904  | 1.852258  |
| H                                        | -1.173698 | -2.577978 | -0.596134 |
| H                                        | -0.310696 | -1.853464 | 0.744390  |
| H                                        | 2.981474  | -3.234503 | -0.040897 |
| H                                        | 1.922041  | -2.701150 | 1.277052  |
| H                                        | 3.486189  | -1.885325 | 1.013135  |
| C                                        | 1.993189  | -1.431977 | -0.436588 |
| O                                        | 1.473888  | -0.101914 | 1.217014  |
| C                                        | 0.737471  | -1.807395 | -1.163061 |
| H                                        | 0.862422  | -2.845287 | -1.492242 |
| H                                        | 0.655219  | -1.187820 | -2.058336 |
| O                                        | 3.603754  | 0.145560  | -0.202059 |
| O                                        | 2.640551  | -0.475588 | -1.006424 |
| Rotational constants (GHz):              |           |           |           |
|                                          | 0.6234100 | 0.3353300 | 0.2551900 |
| Vibrational harmonic frequencies (cm-1): |           |           |           |
| -277.4873                                | 32.1347   |           | 62.9368   |
| 73.1158                                  | 122.0423  |           | 144.2360  |
| 156.1004                                 | 174.0911  |           | 176.1500  |
| 190.5172                                 | 210.1700  |           | 227.4702  |
| 238.1664                                 | 245.9060  |           | 276.5593  |
| 281.5149                                 | 291.4761  |           | 303.3925  |
| 346.7870                                 | 353.9894  |           | 365.8966  |
| 374.0724                                 | 407.4012  |           | 417.5089  |
| 448.9035                                 | 478.2219  |           | 491.4376  |
| 515.0277                                 | 559.9889  |           | 568.3255  |
| 598.3689                                 | 625.6378  |           | 691.3325  |
| 708.6724                                 | 749.9382  |           | 783.0099  |
| 804.8703                                 | 816.5472  |           | 866.7351  |
| 883.9547                                 | 891.4490  |           | 903.4006  |
| 922.3808                                 | 927.5731  |           | 929.5782  |
| 945.8433                                 | 948.4427  |           | 971.3101  |
| 989.8164                                 | 994.2720  |           | 1008.3620 |
| 1018.3395                                | 1030.5229 |           | 1036.0391 |
| 1044.6170                                | 1052.9103 |           | 1085.2374 |
| 1092.7425                                | 1126.0371 |           | 1166.1246 |
| 1198.7096                                | 1200.9704 |           | 1206.6867 |
| 1222.6683                                | 1230.7879 |           | 1250.8631 |
| 1269.1798                                | 1280.3661 |           | 1292.5801 |
| 1296.0535                                | 1313.5217 |           | 1343.3209 |
| 1354.3317                                | 1362.1536 |           | 1369.0895 |
| 1371.4066                                | 1379.3280 |           | 1393.2077 |
| 1402.2332                                | 1402.6073 |           | 1419.8256 |
| 1433.6863                                | 1450.4511 |           | 1458.3613 |
| 1473.5882                                | 1478.8271 |           | 1487.3316 |

|           |           |           |
|-----------|-----------|-----------|
| 1488.1955 | 1490.9497 | 1497.9751 |
| 1499.0174 | 1508.3568 | 1511.1244 |
| 1511.9464 | 1570.3960 | 1684.0438 |
| 2969.6102 | 3003.5618 | 3006.8517 |
| 3008.7425 | 3011.9021 | 3017.0240 |
| 3020.5509 | 3034.1571 | 3043.6061 |
| 3052.3505 | 3063.6136 | 3069.4825 |
| 3076.0372 | 3079.3065 | 3082.3708 |
| 3086.4104 | 3090.6156 | 3096.3989 |
| 3104.6826 | 3118.9486 | 3125.5061 |
| 3134.9403 | 3191.3123 | 3214.8959 |

Zero-point correction (Hartree): 0.364403

## TS22

-----  
E(RB+HF-LYP/6-311G(d,p)) (Hartree): -811.737182156

Electronic state : 1-A

Cartesian coordinates (Angs):

|   |           |           |           |
|---|-----------|-----------|-----------|
| C | 1.767869  | 0.789221  | -0.391778 |
| C | 1.059632  | -0.558550 | -0.029448 |
| C | 3.120947  | 0.161873  | 0.054362  |
| C | 2.478883  | -1.255008 | 0.020899  |
| C | 2.872029  | -2.016616 | -1.247870 |
| C | 2.732459  | -2.120763 | 1.254964  |
| C | 1.386473  | 2.122695  | 0.242522  |
| C | -0.015003 | 2.362876  | 0.766047  |
| C | -1.108879 | 2.490440  | -0.354372 |
| C | 2.305729  | 3.084517  | 0.365791  |
| C | -2.240511 | 1.535158  | -0.194996 |
| C | -0.032026 | -1.088479 | -0.978908 |
| C | -3.271420 | -1.915555 | 1.163451  |
| H | 1.758662  | 0.906578  | -1.482591 |
| H | 0.665988  | -0.501223 | 0.986091  |
| H | 3.383210  | 0.472275  | 1.068438  |
| H | 3.985463  | 0.322850  | -0.594816 |
| H | 3.934249  | -2.278850 | -1.207075 |
| H | 2.715347  | -1.423816 | -2.153726 |
| H | 2.306560  | -2.947540 | -1.355215 |
| H | 3.786817  | -2.411023 | 1.323166  |
| H | 2.138194  | -3.040622 | 1.222034  |
| H | 2.472377  | -1.587076 | 2.173515  |
| H | -0.011169 | 3.283924  | 1.351181  |
| H | -0.299536 | 1.551903  | 1.434396  |
| H | -0.673143 | 2.335715  | -1.342433 |
| H | -1.519423 | 3.505425  | -0.334213 |
| H | 2.067001  | 4.047352  | 0.805199  |
| H | 3.330145  | 2.942835  | 0.038338  |
| H | -2.993016 | 1.616024  | 0.578451  |
| H | 0.429646  | -1.715415 | -1.746769 |
| H | -0.472365 | -0.257368 | -1.529799 |
| H | -3.991037 | -1.233673 | 1.614170  |
| H | -2.859912 | -2.558623 | 1.949443  |
| H | -3.772429 | -2.547838 | 0.428590  |
| C | -2.140002 | -1.122001 | 0.541892  |
| O | -3.328960 | -0.293646 | -0.879947 |
| O | -2.478307 | 0.772485  | -1.192587 |
| O | -1.741372 | -0.071599 | 1.115296  |
| C | -1.167820 | -1.907073 | -0.339305 |
| H | -1.738883 | -2.424517 | -1.113155 |
| H | -0.743794 | -2.691631 | 0.305184  |

|                                          |           |           |           |
|------------------------------------------|-----------|-----------|-----------|
| Rotational constants (GHz):              | 0.5594100 | 0.3487200 | 0.2534400 |
| Vibrational harmonic frequencies (cm-1): |           |           |           |
| -283.2121                                | 24.8107   |           | 45.5026   |
| 57.2318                                  | 114.2134  |           | 125.5460  |
| 149.3885                                 | 171.0036  |           | 173.1402  |
| 184.4986                                 | 214.2633  |           | 221.1297  |
| 227.8099                                 | 255.5311  |           | 271.3601  |
| 296.6084                                 | 302.7620  |           | 318.0444  |
| 320.9023                                 | 339.7819  |           | 365.4103  |
| 393.3301                                 | 408.4187  |           | 416.9235  |
| 440.3461                                 | 461.6858  |           | 498.1321  |
| 514.0479                                 | 525.9970  |           | 559.7494  |
| 564.7969                                 | 594.6169  |           | 644.1943  |
| 701.7934                                 | 728.2073  |           | 760.9897  |
| 795.0167                                 | 821.8444  |           | 863.9444  |
| 887.2247                                 | 904.0632  |           | 916.2344  |
| 926.0377                                 | 931.2312  |           | 938.2784  |
| 949.2369                                 | 955.8839  |           | 976.7242  |
| 982.4992                                 | 995.2904  |           | 1003.5046 |
| 1006.1350                                | 1012.4095 |           | 1035.0150 |
| 1045.9154                                | 1072.8586 |           | 1088.6339 |
| 1110.3096                                | 1122.0592 |           | 1163.4435 |
| 1184.6088                                | 1200.2778 |           | 1202.9696 |
| 1224.3784                                | 1228.8794 |           | 1238.6336 |
| 1263.2569                                | 1266.9348 |           | 1286.4686 |
| 1294.0259                                | 1300.6202 |           | 1306.1483 |
| 1339.6126                                | 1344.1443 |           | 1356.6790 |
| 1373.8650                                | 1382.1599 |           | 1393.6696 |
| 1400.3472                                | 1401.4381 |           | 1418.0727 |
| 1445.6182                                | 1456.2406 |           | 1465.9750 |
| 1469.9120                                | 1479.9756 |           | 1486.1158 |
| 1487.5128                                | 1494.3163 |           | 1498.1720 |
| 1502.3334                                | 1508.8825 |           | 1509.2596 |
| 1516.0664                                | 1554.1208 |           | 1683.9798 |
| 2988.8940                                | 3002.9879 |           | 3007.4146 |
| 3016.1102                                | 3030.0176 |           | 3036.4892 |
| 3040.4091                                | 3056.0094 |           | 3064.4484 |
| 3067.7560                                | 3074.5196 |           | 3077.8499 |
| 3080.1846                                | 3082.9706 |           | 3087.6407 |
| 3092.9260                                | 3099.7614 |           | 3101.2552 |
| 3104.3594                                | 3127.1655 |           | 3127.8750 |
| 3140.5808                                | 3205.6236 |           | 3206.3501 |
| Zero-point correction (Hartree):         | 0.364008  |           |           |

**TS23**

-----  
E(RB+HF-LYP/6-311G(d,p)) (Hartree): -811.732694763

Electronic state : 1-A

Cartesian coordinates (Angs):

|   |           |           |           |
|---|-----------|-----------|-----------|
| C | -1.511008 | 0.877268  | 0.364098  |
| C | -1.541023 | -0.503196 | -0.392570 |
| C | -3.059861 | 0.856807  | 0.389488  |
| C | -3.041577 | -0.664108 | 0.066448  |
| C | -3.221773 | -1.505868 | 1.336248  |
| C | -4.008637 | -1.132436 | -1.019193 |
| C | -0.796079 | 2.063673  | -0.236289 |
| C | 0.679736  | 1.885462  | -0.508907 |
| C | 1.519059  | 1.854007  | 0.785167  |
| C | -1.412465 | 3.213329  | -0.519692 |
| C | 2.809873  | 1.105162  | 0.835669  |

|                                          |           |           |           |
|------------------------------------------|-----------|-----------|-----------|
| C                                        | -0.583266 | -1.656442 | -0.064308 |
| C                                        | 3.186339  | -2.356205 | -0.099959 |
| H                                        | -1.123438 | 0.699683  | 1.374466  |
| H                                        | -1.534025 | -0.315455 | -1.473079 |
| H                                        | -3.484773 | 1.433145  | -0.435364 |
| H                                        | -3.550469 | 1.159883  | 1.318013  |
| H                                        | -4.247926 | -1.403939 | 1.704094  |
| H                                        | -2.551447 | -1.191147 | 2.140439  |
| H                                        | -3.042233 | -2.568548 | 1.149084  |
| H                                        | -5.046963 | -1.068461 | -0.675632 |
| H                                        | -3.817465 | -2.175127 | -1.296314 |
| H                                        | -3.916077 | -0.522853 | -1.922603 |
| H                                        | 1.041682  | 2.694127  | -1.148092 |
| H                                        | 0.849273  | 0.968227  | -1.062642 |
| H                                        | 0.938980  | 1.475409  | 1.629800  |
| H                                        | 1.792250  | 2.882639  | 1.068175  |
| H                                        | -0.869674 | 4.050285  | -0.946904 |
| H                                        | -2.470002 | 3.364972  | -0.339685 |
| H                                        | 3.407807  | 1.257849  | 1.733900  |
| H                                        | -1.125157 | -2.580829 | -0.293074 |
| H                                        | -0.390709 | -1.672770 | 1.010927  |
| H                                        | 3.375992  | -2.613576 | -1.142004 |
| H                                        | 2.956399  | -3.276194 | 0.452671  |
| H                                        | 4.079524  | -1.910070 | 0.336314  |
| C                                        | 2.005855  | -1.417956 | 0.047291  |
| O                                        | 1.877758  | -0.757815 | 1.111553  |
| C                                        | 0.770912  | -1.730096 | -0.812705 |
| H                                        | 0.908218  | -2.740431 | -1.209917 |
| H                                        | 0.780144  | -1.075900 | -1.688208 |
| O                                        | 3.553798  | 0.664263  | -0.110436 |
| O                                        | 2.851390  | 0.067635  | -1.164753 |
| Rotational constants (GHz):              |           |           |           |
|                                          | 0.6507100 | 0.3048500 | 0.2367700 |
| Vibrational harmonic frequencies (cm-1): |           |           |           |
| -328.1851                                | 21.6074   |           | 41.7129   |
| 82.1880                                  | 119.7543  |           | 133.0840  |
| 152.0607                                 | 164.2180  |           | 187.7006  |
| 211.9253                                 | 215.4712  |           | 226.2455  |
| 233.7872                                 | 242.2485  |           | 257.0977  |
| 272.8834                                 | 285.3589  |           | 288.4876  |
| 294.7909                                 | 338.2258  |           | 360.5165  |
| 374.3945                                 | 401.5280  |           | 410.9786  |
| 431.5020                                 | 482.5585  |           | 492.9532  |
| 509.9805                                 | 519.7182  |           | 562.9262  |
| 615.5791                                 | 626.0675  |           | 697.2475  |
| 718.7477                                 | 743.0010  |           | 765.0986  |
| 789.2647                                 | 801.5785  |           | 865.0505  |
| 868.7860                                 | 878.6463  |           | 889.5617  |
| 903.2372                                 | 924.1406  |           | 926.3079  |
| 949.5883                                 | 958.3113  |           | 965.9237  |
| 988.8087                                 | 1000.4549 |           | 1008.3854 |
| 1008.6217                                | 1025.1521 |           | 1033.4334 |
| 1044.7965                                | 1054.2768 |           | 1086.5246 |
| 1105.9427                                | 1128.7810 |           | 1163.1590 |
| 1189.6104                                | 1195.7418 |           | 1202.8162 |
| 1208.4953                                | 1230.8563 |           | 1249.3324 |
| 1261.3691                                | 1280.0090 |           | 1283.8742 |
| 1296.7752                                | 1318.9707 |           | 1323.8327 |
| 1348.2935                                | 1361.4286 |           | 1371.4767 |
| 1376.9149                                | 1394.4938 |           | 1396.1636 |
| 1400.1219                                | 1402.6853 |           | 1419.1793 |
| 1445.0900                                | 1452.4671 |           | 1458.8556 |

|           |           |           |
|-----------|-----------|-----------|
| 1468.5365 | 1477.0044 | 1482.2418 |
| 1485.4611 | 1488.1318 | 1496.6914 |
| 1505.6045 | 1507.6628 | 1509.5938 |
| 1513.6560 | 1565.7687 | 1698.9574 |
| 2983.4176 | 3007.0248 | 3008.8283 |
| 3015.3472 | 3016.3883 | 3020.6412 |
| 3021.6173 | 3041.6538 | 3042.6022 |
| 3062.9719 | 3064.5236 | 3072.5472 |
| 3075.3727 | 3078.9479 | 3079.6548 |
| 3084.9372 | 3088.9989 | 3093.1511 |
| 3099.3181 | 3133.0044 | 3136.3297 |
| 3141.4696 | 3171.1231 | 3212.5199 |

Zero-point correction (Hartree): 0.363757

**TS24**-from SOZ1 to Acid

-----  
E(UB+HF-LYP/6-311G(d,p)) (Hartree): -811.731037994

Electronic state : 1-A

Cartesian coordinates (Angs):

|   |           |           |           |
|---|-----------|-----------|-----------|
| C | 1.300466  | 0.636692  | -0.586937 |
| C | 0.918056  | -0.743046 | 0.094654  |
| C | 2.750128  | 0.103968  | -0.797614 |
| C | 2.457468  | -1.112675 | 0.123410  |
| C | 2.910081  | -2.465441 | -0.421872 |
| C | 3.025350  | -0.900885 | 1.532210  |
| C | 1.157261  | 1.985444  | 0.126893  |
| C | -0.067561 | 2.339429  | 0.965080  |
| C | -1.425457 | 2.511792  | 0.220184  |
| C | 2.101873  | 2.921560  | -0.014828 |
| C | -1.783567 | 1.198303  | -0.454338 |
| C | -0.026341 | -1.666683 | -0.729813 |
| C | -3.287123 | -1.321897 | 1.416229  |
| H | 0.773114  | 0.734002  | -1.539953 |
| H | 0.523033  | -0.637162 | 1.106347  |
| H | 3.567404  | 0.749283  | -0.472089 |
| H | 2.936307  | -0.187550 | -1.834555 |
| H | 4.003950  | -2.519202 | -0.416711 |
| H | 2.582671  | -2.629068 | -1.451743 |
| H | 2.538380  | -3.296036 | 0.188495  |
| H | 4.119329  | -0.953164 | 1.524894  |
| H | 2.655170  | -1.667967 | 2.221305  |
| H | 2.741975  | 0.076332  | 1.932265  |
| H | 0.138993  | 3.284657  | 1.473164  |
| H | -0.212951 | 1.587676  | 1.743918  |
| H | -1.356936 | 3.291286  | -0.539945 |
| H | -2.188193 | 2.789237  | 0.950959  |
| H | 1.991779  | 3.903212  | 0.433788  |
| H | 3.005639  | 2.757416  | -0.588315 |
| H | -2.960962 | 0.862506  | -0.801704 |
| H | 0.504497  | -2.589055 | -0.980797 |
| H | -0.282311 | -1.197354 | -1.681541 |
| H | -2.679208 | -1.359665 | 2.321650  |
| H | -3.779409 | -2.283196 | 1.259451  |
| H | -4.048903 | -0.548485 | 1.528596  |
| C | -2.408970 | -0.997356 | 0.192534  |
| O | -3.131410 | -0.807127 | -0.917901 |
| O | -1.374463 | 1.008587  | -1.660558 |
| O | -1.676546 | 0.192503  | 0.525260  |
| C | -1.323006 | -2.132361 | -0.044105 |
| H | -1.804500 | -2.918708 | -0.628121 |
| H | -1.101460 | -2.541773 | 0.946108  |

|                                          |           |           |           |
|------------------------------------------|-----------|-----------|-----------|
| Rotational constants (GHz):              | 0.5783500 | 0.3782100 | 0.2768100 |
| Vibrational harmonic frequencies (cm-1): |           |           |           |
| -1961.1803                               | 37.4529   |           | 51.3842   |
| 73.4286                                  | 103.5491  |           | 148.5494  |
| 171.1531                                 | 180.2572  |           | 200.0379  |
| 228.3247                                 | 242.4453  |           | 253.1765  |
| 262.1442                                 | 265.9273  |           | 280.1733  |
| 306.0699                                 | 320.0755  |           | 330.2460  |
| 346.8550                                 | 367.2188  |           | 373.5315  |
| 401.0930                                 | 416.5843  |           | 427.1885  |
| 460.1620                                 | 486.5528  |           | 488.3221  |
| 516.9806                                 | 561.3859  |           | 569.5581  |
| 617.3810                                 | 628.5116  |           | 667.5833  |
| 706.9232                                 | 756.6395  |           | 770.8494  |
| 802.2281                                 | 828.6469  |           | 848.2812  |
| 863.0144                                 | 872.1040  |           | 896.0913  |
| 918.2444                                 | 927.2449  |           | 927.8562  |
| 936.2838                                 | 949.3791  |           | 958.1540  |
| 974.4495                                 | 977.1339  |           | 990.2281  |
| 1002.2373                                | 1017.7646 |           | 1020.7075 |
| 1028.7788                                | 1050.4395 |           | 1062.6862 |
| 1080.8230                                | 1085.3126 |           | 1107.6212 |
| 1132.5736                                | 1150.4157 |           | 1170.5191 |
| 1179.7525                                | 1208.4904 |           | 1210.9487 |
| 1217.5633                                | 1235.4135 |           | 1238.3856 |
| 1268.0038                                | 1272.7219 |           | 1283.3034 |
| 1296.4111                                | 1318.6569 |           | 1324.7749 |
| 1339.5963                                | 1357.7257 |           | 1364.8947 |
| 1374.3341                                | 1387.0484 |           | 1393.5410 |
| 1402.3256                                | 1419.9502 |           | 1450.0023 |
| 1469.4099                                | 1478.3255 |           | 1480.2661 |
| 1481.6103                                | 1484.8678 |           | 1487.5419 |
| 1489.3956                                | 1491.1171 |           | 1496.2675 |
| 1506.5984                                | 1515.3927 |           | 1677.7688 |
| 1696.4297                                | 3008.2465 |           | 3013.7597 |
| 3020.4776                                | 3039.3938 |           | 3042.4802 |
| 3045.9288                                | 3047.7109 |           | 3048.9089 |
| 3060.4686                                | 3062.0732 |           | 3065.6744 |
| 3071.2366                                | 3084.6709 |           | 3086.8633 |
| 3088.3481                                | 3089.1293 |           | 3097.9602 |
| 3101.5381                                | 3116.7843 |           | 3122.8470 |
| 3126.9650                                | 3136.4461 |           | 3216.3054 |
| Zero-point correction (Hartree):         | 0.359244  |           |           |

TS25-from SOZ2 to Acid

-----  
E(UB+HF-LYP/6-311G(d,p)) (Hartree): -811.741731198

Electronic state : 1-A

Cartesian coordinates (Angs):

|   |           |           |           |
|---|-----------|-----------|-----------|
| C | -1.246365 | 0.768163  | 0.778682  |
| C | -1.127719 | -0.520700 | -0.115098 |
| C | -2.673565 | 0.968518  | 0.186614  |
| C | -2.701603 | -0.528196 | -0.230951 |
| C | -3.407449 | -1.388993 | 0.824555  |
| C | -3.254164 | -0.838960 | -1.620216 |
| C | -0.322922 | 1.970880  | 0.772989  |
| C | 0.218764  | 2.545461  | -0.529978 |
| C | 1.700544  | 2.184052  | -0.863642 |
| C | -0.059419 | 2.603203  | 1.920896  |
| C | 1.783886  | 0.677418  | -1.030996 |

|                                          |           |           |           |
|------------------------------------------|-----------|-----------|-----------|
| C                                        | -0.422487 | -1.806802 | 0.369308  |
| C                                        | 2.552175  | -1.577561 | 1.714318  |
| H                                        | -1.345829 | 0.447629  | 1.820107  |
| H                                        | -0.744813 | -0.248800 | -1.101258 |
| H                                        | -2.659496 | 1.627710  | -0.686129 |
| H                                        | -3.446292 | 1.319707  | 0.875442  |
| H                                        | -4.480557 | -1.172076 | 0.824798  |
| H                                        | -3.033306 | -1.200038 | 1.834356  |
| H                                        | -3.290387 | -2.457609 | 0.620335  |
| H                                        | -4.336064 | -0.671492 | -1.662283 |
| H                                        | -3.072243 | -1.884544 | -1.893269 |
| H                                        | -2.786167 | -0.209856 | -2.382772 |
| H                                        | 0.159382  | 3.636249  | -0.485115 |
| H                                        | -0.396754 | 2.230943  | -1.377704 |
| H                                        | 2.363157  | 2.510451  | -0.061735 |
| H                                        | 1.987449  | 2.671609  | -1.797213 |
| H                                        | 0.526312  | 3.516956  | 1.950094  |
| H                                        | -0.415599 | 2.226148  | 2.873573  |
| H                                        | 2.881915  | 0.144697  | -1.271450 |
| H                                        | -1.069207 | -2.651463 | 0.105600  |
| H                                        | -0.379377 | -1.812886 | 1.464831  |
| H                                        | 2.989675  | -2.575207 | 1.739443  |
| H                                        | 1.676677  | -1.547159 | 2.364946  |
| H                                        | 3.280735  | -0.841791 | 2.050820  |
| C                                        | 2.105448  | -1.230788 | 0.274394  |
| O                                        | 1.649858  | 0.118272  | 0.271880  |
| C                                        | 0.966896  | -2.153653 | -0.218437 |
| H                                        | 1.226123  | -3.183585 | 0.046855  |
| H                                        | 0.931510  | -2.097848 | -1.306255 |
| O                                        | 1.173021  | 0.170364  | -2.050591 |
| O                                        | 3.272251  | -1.264886 | -0.463869 |
| Rotational constants (GHz):              | 0.5686800 | 0.3699700 | 0.3028500 |
| Vibrational harmonic frequencies (cm-1): |           |           |           |
| -1931.7949                               | 57.2039   |           | 70.0892   |
| 81.8980                                  | 132.5752  |           | 144.6876  |
| 159.5998                                 | 176.1063  |           | 185.0889  |
| 195.2587                                 | 224.6597  |           | 229.3393  |
| 236.6176                                 | 252.2589  |           | 265.4742  |
| 276.7326                                 | 308.1081  |           | 318.9277  |
| 342.0850                                 | 352.6854  |           | 377.7650  |
| 399.6248                                 | 420.6289  |           | 441.9913  |
| 446.3443                                 | 477.4998  |           | 505.4180  |
| 533.2412                                 | 566.9474  |           | 591.4952  |
| 619.6433                                 | 629.6492  |           | 674.7097  |
| 714.0593                                 | 729.9506  |           | 777.0112  |
| 789.1734                                 | 805.6480  |           | 835.4153  |
| 841.0862                                 | 868.3312  |           | 900.1719  |
| 902.3692                                 | 908.4080  |           | 922.2467  |
| 932.1533                                 | 945.0329  |           | 951.8876  |
| 973.9101                                 | 978.4050  |           | 986.7943  |
| 994.2936                                 | 1002.4803 |           | 1019.8781 |
| 1037.8786                                | 1042.5723 |           | 1068.2715 |
| 1096.4727                                | 1115.4213 |           | 1133.1717 |
| 1151.4940                                | 1163.8687 |           | 1173.1835 |
| 1192.8768                                | 1202.4944 |           | 1215.1618 |
| 1221.5863                                | 1233.7918 |           | 1262.4942 |
| 1272.3710                                | 1283.3986 |           | 1292.4897 |
| 1307.4881                                | 1329.8411 |           | 1332.2549 |
| 1339.6928                                | 1360.2385 |           | 1367.3206 |
| 1368.0726                                | 1376.7129 |           | 1390.4151 |
| 1404.2623                                | 1420.4782 |           | 1454.3678 |

|           |           |           |
|-----------|-----------|-----------|
| 1470.2616 | 1474.4650 | 1477.1975 |
| 1481.5542 | 1483.2751 | 1485.9960 |
| 1491.8147 | 1493.9374 | 1496.8920 |
| 1507.0267 | 1508.3535 | 1681.1940 |
| 1730.8752 | 3008.0967 | 3010.3059 |
| 3019.6313 | 3032.8081 | 3033.7113 |
| 3035.5480 | 3038.1295 | 3045.1752 |
| 3054.2451 | 3057.4855 | 3064.1509 |
| 3065.4252 | 3075.4131 | 3077.9146 |
| 3079.1688 | 3084.9809 | 3087.8648 |
| 3114.3905 | 3121.2323 | 3124.2055 |
| 3134.1044 | 3151.4105 | 3199.5934 |

Zero-point correction (Hartree): 0.358996

CCCCCCCCCCCCCCCCCCCCCCCC

CCCCCCCCCCCCCCCCCCCCCCCC

**SOZ-1**

-----

E(RB+HF-LYP/6-311G(d,p)) (Hartree): -811.795054198

Electronic state : 1-A

Cartesian coordinates (Angs):

|   |           |           |           |
|---|-----------|-----------|-----------|
| C | -1.401555 | 0.773972  | 0.358396  |
| C | -1.306866 | -0.565772 | -0.463456 |
| C | -2.929631 | 0.541972  | 0.502017  |
| C | -2.754897 | -0.933348 | 0.052154  |
| C | -2.782272 | -1.885014 | 1.255260  |
| C | -3.717907 | -1.422753 | -1.028427 |
| C | -0.952618 | 2.090325  | -0.237180 |
| C | 0.436869  | 2.214511  | -0.828875 |
| C | 1.600989  | 2.378139  | 0.177897  |
| C | -1.754307 | 3.160019  | -0.241557 |
| C | 2.337896  | 1.101453  | 0.547784  |
| C | -0.236210 | -1.640296 | -0.228218 |
| C | 3.599802  | -1.892091 | -0.504519 |
| H | -0.898089 | 0.629280  | 1.318899  |
| H | -1.369275 | -0.341191 | -1.535152 |
| H | -3.498307 | 1.120574  | -0.228973 |
| H | -3.367171 | 0.701918  | 1.490796  |
| H | -3.794410 | -1.916219 | 1.671727  |
| H | -2.109292 | -1.560703 | 2.053332  |
| H | -2.508289 | -2.907547 | 0.979611  |
| H | -4.737093 | -1.513191 | -0.636759 |
| H | -3.420849 | -2.408240 | -1.404756 |
| H | -3.745210 | -0.733651 | -1.877479 |
| H | 0.440514  | 3.093078  | -1.478215 |
| H | 0.659590  | 1.360006  | -1.472008 |
| H | 1.266589  | 2.865617  | 1.098288  |
| H | 2.357755  | 3.034708  | -0.261653 |
| H | -1.425878 | 4.106887  | -0.658023 |
| H | -2.754781 | 3.139124  | 0.173211  |
| H | 3.273333  | 1.315615  | 1.081402  |
| H | -0.707771 | -2.585079 | -0.521913 |
| H | -0.029018 | -1.737386 | 0.838503  |
| H | 3.780674  | -1.948163 | -1.579891 |
| H | 3.461938  | -2.905493 | -0.121447 |
| H | 4.463022  | -1.435785 | -0.020155 |



|                                          |           |           |           |
|------------------------------------------|-----------|-----------|-----------|
| C                                        | 2.357044  | -1.054417 | -0.246308 |
| O                                        | 2.192832  | -1.011022 | 1.180589  |
| O                                        | 1.525560  | 0.269160  | 1.363893  |
| O                                        | 2.616198  | 0.312372  | -0.595194 |
| C                                        | 1.107684  | -1.586520 | -0.995230 |
| H                                        | 1.345466  | -2.609057 | -1.301972 |
| H                                        | 1.015712  | -1.010260 | -1.920100 |
| Rotational constants (GHz):              | 0.6151300 | 0.3496000 | 0.2603200 |
| Vibrational harmonic frequencies (cm-1): |           |           |           |
| 32.6656                                  | 59.8236   |           | 64.4490   |
| 104.2900                                 | 148.0079  |           | 169.0927  |
| 185.8628                                 | 208.8063  |           | 220.9832  |
| 236.2871                                 | 238.1532  |           | 250.3567  |
| 263.8896                                 | 277.7725  |           | 289.1346  |
| 304.8684                                 | 344.9609  |           | 366.7264  |
| 373.7540                                 | 382.9800  |           | 404.8550  |
| 423.9858                                 | 439.0544  |           | 492.8383  |
| 504.5364                                 | 557.1486  |           | 577.8102  |
| 585.5097                                 | 635.6697  |           | 644.4841  |
| 692.0779                                 | 734.9365  |           | 748.6356  |
| 781.3258                                 | 801.6919  |           | 818.0450  |
| 857.7002                                 | 864.5107  |           | 885.8314  |
| 897.4563                                 | 900.4026  |           | 907.8441  |
| 924.0699                                 | 924.8421  |           | 945.1532  |
| 949.6520                                 | 959.7052  |           | 968.1785  |
| 993.3810                                 | 1010.5273 |           | 1023.8643 |
| 1030.8278                                | 1047.6905 |           | 1053.4928 |
| 1062.9021                                | 1087.6853 |           | 1112.4388 |
| 1135.1795                                | 1150.6903 |           | 1166.2006 |
| 1182.1431                                | 1202.8946 |           | 1206.2410 |
| 1210.8341                                | 1220.1518 |           | 1230.1878 |
| 1247.3196                                | 1269.9124 |           | 1279.1570 |
| 1292.6756                                | 1310.2340 |           | 1326.1978 |
| 1346.4383                                | 1360.9795 |           | 1371.1342 |
| 1375.6403                                | 1379.5878 |           | 1388.2108 |
| 1397.1654                                | 1402.2194 |           | 1407.7164 |
| 1410.7614                                | 1419.5456 |           | 1451.9754 |
| 1474.4731                                | 1479.5025 |           | 1483.5141 |
| 1486.1077                                | 1487.1041 |           | 1489.7121 |
| 1492.7125                                | 1497.8085 |           | 1506.7900 |
| 1508.8869                                | 1511.4411 |           | 1686.5165 |
| 2998.9055                                | 3006.0302 |           | 3009.9531 |
| 3011.8386                                | 3019.7361 |           | 3039.4617 |
| 3041.5782                                | 3042.6511 |           | 3047.3129 |
| 3050.3314                                | 3052.9881 |           | 3063.5029 |
| 3073.1923                                | 3075.9335 |           | 3078.4146 |
| 3081.8214                                | 3086.2186 |           | 3090.3277 |
| 3092.6942                                | 3097.2386 |           | 3117.1358 |
| 3132.0779                                | 3133.6082 |           | 3212.0649 |
| Zero-point correction (Hartree):         | 0.368322  |           |           |

## SOZ-2

-----  
E(RB+HF-LYP/6-311G(d,p)) (Hartree): -811.795615428

Electronic state : 1-A

Cartesian coordinates (Angs):

|   |           |           |           |
|---|-----------|-----------|-----------|
| C | -1.303508 | 0.842933  | 0.335537  |
| C | -1.505394 | -0.478682 | -0.505338 |
| C | -2.831077 | 0.840700  | 0.610045  |
| C | -2.918387 | -0.645995 | 0.167581  |

|   |           |           |           |
|---|-----------|-----------|-----------|
| C | -2.934428 | -1.588422 | 1.377240  |
| C | -4.057820 | -0.995551 | -0.788826 |
| C | -0.675572 | 2.074833  | -0.281847 |
| C | 0.817126  | 2.082935  | -0.563462 |
| C | 1.715811  | 2.025752  | 0.700432  |
| C | -1.384756 | 3.175392  | -0.551771 |
| C | 2.419946  | 0.700977  | 0.973979  |
| C | -0.564342 | -1.686336 | -0.447883 |
| C | 2.719610  | -2.427402 | 0.273835  |
| H | -0.756678 | 0.588141  | 1.247688  |
| H | -1.655420 | -0.199922 | -1.555398 |
| H | -3.377917 | 1.484450  | -0.080735 |
| H | -3.150666 | 1.073654  | 1.629062  |
| H | -3.887838 | -1.490378 | 1.906383  |
| H | -2.138517 | -1.357539 | 2.090381  |
| H | -2.827835 | -2.636388 | 1.080938  |
| H | -5.028110 | -0.935722 | -0.283710 |
| H | -3.951585 | -2.014742 | -1.177075 |
| H | -4.082343 | -0.312553 | -1.642868 |
| H | 1.047640  | 3.000774  | -1.108347 |
| H | 1.087733  | 1.265742  | -1.231911 |
| H | 1.126261  | 2.273748  | 1.589625  |
| H | 2.501515  | 2.784704  | 0.637610  |
| H | -0.911050 | 4.052856  | -0.979399 |
| H | -2.446100 | 3.254358  | -0.355095 |
| H | 2.885387  | 0.711262  | 1.966040  |
| H | -1.103936 | -2.521722 | -0.908945 |
| H | -0.391029 | -1.975822 | 0.590784  |
| H | 3.099689  | -3.019030 | -0.561713 |
| H | 2.052517  | -3.050309 | 0.874411  |
| H | 3.558018  | -2.110236 | 0.894560  |
| C | 1.969427  | -1.207992 | -0.246344 |
| O | 1.540026  | -0.403252 | 0.862196  |
| C | 0.790055  | -1.538327 | -1.175178 |
| H | 1.034729  | -2.463785 | -1.702141 |
| H | 0.726587  | -0.758322 | -1.937542 |
| O | 3.504353  | 0.400812  | 0.086131  |
| O | 2.836723  | -0.334073 | -0.979652 |

Rotational constants (GHz): 0.6566800 0.3331600 0.2553600

Vibrational harmonic frequencies (cm<sup>-1</sup>):

|           |           |           |
|-----------|-----------|-----------|
| 29.0531   | 57.2353   | 67.0249   |
| 119.1496  | 146.4520  | 154.1080  |
| 178.2267  | 206.6324  | 215.2343  |
| 219.5708  | 235.5354  | 239.4154  |
| 246.9246  | 285.8812  | 294.4642  |
| 327.8592  | 347.9101  | 352.7263  |
| 370.6350  | 376.3877  | 407.8738  |
| 423.9875  | 452.9591  | 500.9251  |
| 517.5585  | 540.5654  | 555.8147  |
| 580.6403  | 612.6525  | 640.4102  |
| 700.6503  | 749.5507  | 789.2997  |
| 796.2426  | 811.1402  | 819.0360  |
| 842.9368  | 867.4552  | 881.7138  |
| 890.5717  | 893.6922  | 909.9868  |
| 924.8504  | 933.3804  | 944.1094  |
| 949.4046  | 954.6582  | 973.7913  |
| 990.7592  | 1007.5096 | 1017.2147 |
| 1021.1089 | 1027.6592 | 1041.7289 |
| 1063.8602 | 1083.4142 | 1106.7585 |
| 1130.6390 | 1140.4924 | 1152.2159 |
| 1176.0781 | 1204.2599 | 1212.3921 |

|           |           |           |
|-----------|-----------|-----------|
| 1222.9161 | 1224.3811 | 1233.3137 |
| 1246.0144 | 1266.5404 | 1278.7077 |
| 1282.1925 | 1301.7274 | 1316.6579 |
| 1330.5008 | 1351.8167 | 1358.7002 |
| 1365.7515 | 1375.0270 | 1381.4480 |
| 1396.9206 | 1402.4748 | 1402.8179 |
| 1408.2090 | 1418.0129 | 1451.8844 |
| 1472.4390 | 1480.9738 | 1482.7802 |
| 1486.2519 | 1487.8549 | 1489.6335 |
| 1496.6334 | 1497.3437 | 1506.9784 |
| 1508.3274 | 1510.7836 | 1688.3004 |
| 3007.1674 | 3011.1650 | 3015.9755 |
| 3020.5940 | 3025.4598 | 3041.9181 |
| 3042.9045 | 3045.4236 | 3051.8767 |
| 3056.1407 | 3058.0775 | 3064.3671 |
| 3073.8833 | 3075.2621 | 3078.5483 |
| 3079.7876 | 3086.5336 | 3087.9156 |
| 3099.1112 | 3112.2831 | 3112.3506 |
| 3129.5822 | 3138.4217 | 3218.8571 |

Zero-point correction (Hartree): 0.368084

POZ-3: B3LYP

-----

E(RB+HF-LYP/6-311G(d,p)) (Hartree): -811.702006790

Electronic state : 1-A

Cartesian coordinates (Angs):

|   |           |           |           |
|---|-----------|-----------|-----------|
| C | -0.001914 | -0.569175 | -0.613977 |
| C | -1.279829 | -0.542823 | 0.317551  |
| C | -0.065222 | -2.120616 | -0.576685 |
| C | -1.516578 | -2.061872 | -0.034465 |
| C | -2.536067 | -2.300888 | -1.155200 |
| C | -1.827727 | -2.960636 | 1.160899  |
| C | 1.400610  | 0.012039  | -0.279787 |
| C | 1.692655  | 1.487324  | -0.656456 |
| C | 1.333060  | 2.599216  | 0.360274  |
| C | -0.034344 | 2.362874  | 0.930628  |
| C | -1.197257 | 2.537274  | 0.296976  |
| C | -2.403896 | 1.780275  | 0.786396  |
| C | -2.473113 | 0.399070  | 0.092332  |
| C | -1.358590 | 3.290187  | -0.998060 |
| H | -0.271601 | -0.200030 | -1.608346 |
| H | -0.972485 | -0.482381 | 1.367479  |
| H | 0.637134  | -2.537234 | 0.148210  |
| H | 0.090783  | -2.636200 | -1.525499 |
| H | -2.484997 | -3.345121 | -1.479047 |
| H | -2.340072 | -1.677426 | -2.031696 |
| H | -3.561573 | -2.107435 | -0.827733 |
| H | -1.826942 | -4.016155 | 0.869212  |
| H | -2.814290 | -2.735193 | 1.581006  |
| H | -1.087806 | -2.835984 | 1.957141  |
| H | 1.175128  | 1.686539  | -1.599176 |
| H | 2.764825  | 1.536350  | -0.867392 |
| H | 1.405898  | 3.561047  | -0.155756 |
| H | 2.076409  | 2.634105  | 1.161338  |
| H | -0.061358 | 1.814969  | 1.871249  |
| H | -3.333511 | 2.325543  | 0.587627  |
| H | -2.342407 | 1.632025  | 1.869406  |
| H | -3.369664 | -0.112548 | 0.462108  |
| H | -2.633770 | 0.538967  | -0.981886 |
| H | -1.693825 | 2.632698  | -1.808174 |
| H | -0.439327 | 3.778403  | -1.322062 |
| H | -2.128062 | 4.062774  | -0.887987 |
| C | 1.944927  | -0.363246 | 1.139711  |
| H | 1.198739  | -0.838465 | 1.775937  |
| H | 2.371149  | 0.506289  | 1.643902  |
| O | 2.954889  | -1.342193 | 0.909258  |
| O | 3.474269  | -0.923431 | -0.373121 |
| O | 2.268509  | -0.794323 | -1.138722 |

Rotational constants (GHz): 0.4729000 0.4306000 0.2679900

Vibrational harmonic frequencies (cm-1):

|          |          |          |
|----------|----------|----------|
| 49.6717  | 67.0118  | 74.1908  |
| 84.8075  | 124.7504 | 158.5074 |
| 159.3900 | 202.4858 | 205.7186 |
| 217.5783 | 228.6730 | 255.2328 |
| 265.2988 | 277.2205 | 303.2539 |
| 314.0231 | 328.9515 | 360.1061 |
| 375.8858 | 393.0966 | 403.0911 |
| 419.7996 | 447.9317 | 489.8540 |
| 511.8749 | 523.4431 | 554.1080 |
| 572.5026 | 599.8054 | 650.1467 |
| 705.1307 | 722.3207 | 741.0813 |
| 780.9365 | 805.7038 | 811.4873 |

|           |           |           |
|-----------|-----------|-----------|
| 836.6624  | 866.0575  | 888.9024  |
| 901.7586  | 914.1101  | 922.5283  |
| 926.7511  | 949.7008  | 951.1028  |
| 967.3616  | 974.6090  | 987.8263  |
| 992.9721  | 1002.5335 | 1011.0733 |
| 1013.7220 | 1036.5232 | 1054.7914 |
| 1064.1386 | 1075.0483 | 1092.0813 |
| 1112.8777 | 1141.7526 | 1156.3128 |
| 1169.0863 | 1188.0676 | 1208.1634 |
| 1221.8029 | 1229.3562 | 1242.3346 |
| 1254.1500 | 1261.2750 | 1270.5341 |
| 1281.5765 | 1302.0214 | 1308.6501 |
| 1325.8645 | 1346.3073 | 1357.3322 |
| 1364.5427 | 1366.9006 | 1380.8913 |
| 1387.6060 | 1400.9896 | 1403.4642 |
| 1419.7388 | 1420.7570 | 1478.1413 |
| 1480.5648 | 1485.6759 | 1488.0582 |
| 1489.3792 | 1493.0406 | 1496.8645 |
| 1497.8500 | 1507.2688 | 1509.5447 |
| 1511.2264 | 1516.0502 | 1733.0645 |
| 3009.0026 | 3009.6654 | 3013.9729 |
| 3019.4458 | 3021.7624 | 3024.5324 |
| 3035.2980 | 3038.8877 | 3041.2771 |
| 3045.6849 | 3054.1225 | 3058.7759 |
| 3059.9078 | 3063.0955 | 3064.8780 |
| 3067.9705 | 3077.5561 | 3080.9029 |
| 3084.2171 | 3090.0293 | 3105.8019 |
| 3109.7070 | 3115.1873 | 3127.0921 |

Zero-point correction (Hartree): 0.367339

POZ-3: MPW1B95

-----  
E(RmPW+HF-B95/6-31+G(d,p)) (Hartree): -811.150854279

Electronic state : 1-A

Cartesian coordinates (Angs):

|   |           |           |           |
|---|-----------|-----------|-----------|
| C | -0.153593 | -0.519655 | -0.616665 |
| C | -1.360645 | -0.217054 | 0.329111  |
| C | -0.555141 | -2.005096 | -0.561719 |
| C | -1.943941 | -1.615299 | -0.035683 |
| C | -2.957797 | -1.573824 | -1.171369 |
| C | -2.484840 | -2.418431 | 1.130222  |
| C | 1.335855  | -0.295683 | -0.288969 |
| C | 1.981800  | 1.043665  | -0.678996 |
| C | 1.928794  | 2.184067  | 0.345939  |
| C | 0.562645  | 2.270436  | 0.943032  |
| C | -0.532995 | 2.670428  | 0.292429  |
| C | -1.874118 | 2.269578  | 0.818434  |
| C | -2.305666 | 0.963327  | 0.142655  |
| C | -0.511228 | 3.305255  | -1.064343 |
| H | -0.348325 | -0.092309 | -1.606234 |
| H | -1.025156 | -0.241346 | 1.373416  |
| H | 0.037121  | -2.540105 | 0.185537  |
| H | -0.507010 | -2.569081 | -1.493696 |
| H | -3.164438 | -2.590080 | -1.515217 |
| H | -2.585962 | -1.007195 | -2.028582 |
| H | -3.905866 | -1.129370 | -0.860005 |
| H | -2.747662 | -3.433101 | 0.820111  |
| H | -3.385152 | -1.955324 | 1.544692  |
| H | -1.746263 | -2.494926 | 1.931860  |
| H | 1.506942  | 1.368791  | -1.608270 |

|                                          |           |           |           |  |
|------------------------------------------|-----------|-----------|-----------|--|
| H                                        | 3.024896  | 0.818992  | -0.916430 |  |
| H                                        | 2.212115  | 3.111253  | -0.158929 |  |
| H                                        | 2.677345  | 2.031803  | 1.125645  |  |
| H                                        | 0.422673  | 1.801023  | 1.915443  |  |
| H                                        | -2.630003 | 3.040023  | 0.639522  |  |
| H                                        | -1.817963 | 2.109071  | 1.898763  |  |
| H                                        | -3.279715 | 0.670898  | 0.550060  |  |
| H                                        | -2.470386 | 1.135800  | -0.925628 |  |
| H                                        | -0.810846 | 2.591271  | -1.839238 |  |
| H                                        | 0.472813  | 3.686916  | -1.333526 |  |
| H                                        | -1.220728 | 4.135112  | -1.110496 |  |
| C                                        | 1.747268  | -0.767102 | 1.131184  |  |
| H                                        | 0.899748  | -1.062986 | 1.749389  |  |
| H                                        | 2.341096  | -0.011708 | 1.647659  |  |
| O                                        | 2.512803  | -1.936078 | 0.915391  |  |
| O                                        | 3.109245  | -1.655498 | -0.343863 |  |
| O                                        | 1.976995  | -1.301061 | -1.106205 |  |
| Rotational constants (GHz):              | 0.4894800 | 0.4437100 | 0.2789500 |  |
| Vibrational harmonic frequencies (cm-1): |           |           |           |  |
| 59.9188                                  | 86.2945   | 98.5839   |           |  |
| 107.0408                                 | 139.0108  | 160.0403  |           |  |
| 196.5364                                 | 210.5302  | 221.9273  |           |  |
| 225.9476                                 | 240.8515  | 264.5720  |           |  |
| 275.3542                                 | 294.9888  | 314.3186  |           |  |
| 323.7801                                 | 344.5892  | 362.1297  |           |  |
| 389.9687                                 | 398.2016  | 404.8229  |           |  |
| 425.1336                                 | 451.8529  | 495.1736  |           |  |
| 529.0615                                 | 529.5431  | 562.4366  |           |  |
| 576.2107                                 | 611.0772  | 668.2410  |           |  |
| 735.1360                                 | 754.9382  | 789.2798  |           |  |
| 815.9425                                 | 818.9513  | 829.0557  |           |  |
| 856.5836                                 | 877.6325  | 899.1428  |           |  |
| 920.2465                                 | 935.5102  | 948.3664  |           |  |
| 959.8226                                 | 971.1308  | 981.4224  |           |  |
| 991.3966                                 | 993.2143  | 1008.5560 |           |  |
| 1017.1307                                | 1021.1627 | 1027.1136 |           |  |
| 1048.6905                                | 1059.8186 | 1061.4474 |           |  |
| 1091.0267                                | 1101.0053 | 1127.8073 |           |  |
| 1135.3618                                | 1147.3983 | 1158.8363 |           |  |
| 1185.3383                                | 1204.8519 | 1227.5005 |           |  |
| 1233.2622                                | 1239.8112 | 1249.4773 |           |  |
| 1256.0399                                | 1265.0745 | 1280.8505 |           |  |
| 1303.1005                                | 1315.1124 | 1325.3270 |           |  |
| 1336.3461                                | 1351.4258 | 1360.2579 |           |  |
| 1369.0025                                | 1374.8527 | 1385.1131 |           |  |
| 1393.4256                                | 1407.1935 | 1414.0091 |           |  |
| 1424.1632                                | 1431.3088 | 1474.7900 |           |  |
| 1483.6150                                | 1488.4531 | 1490.4975 |           |  |
| 1493.1182                                | 1497.0061 | 1498.7106 |           |  |
| 1504.8299                                | 1514.1547 | 1516.0398 |           |  |
| 1519.7590                                | 1527.6257 | 1773.5012 |           |  |
| 3053.5772                                | 3055.0518 | 3056.3720 |           |  |
| 3058.2272                                | 3066.4689 | 3070.1286 |           |  |
| 3079.3880                                | 3083.4413 | 3090.7235 |           |  |
| 3096.5485                                | 3104.7916 | 3110.8099 |           |  |
| 3120.5739                                | 3124.0578 | 3126.8879 |           |  |
| 3132.7058                                | 3141.3334 | 3143.1517 |           |  |
| 3145.3118                                | 3148.5536 | 3157.0273 |           |  |
| 3167.8204                                | 3172.8291 | 3175.7012 |           |  |
| Zero-point correction (Hartree):         | 0.373273  |           |           |  |

POZ-4: B3LYP

-----  
 E(RB+HF-LYP/6-311G(d,p)) (Hartree): -811.699665973

Electronic state : 1-A

Cartesian coordinates (Angs):

|   |           |           |           |
|---|-----------|-----------|-----------|
| C | -0.208311 | 0.497530  | -0.607661 |
| C | 0.945711  | 0.982284  | 0.361280  |
| C | -0.738226 | 1.957699  | -0.641535 |
| C | 0.589605  | 2.471235  | -0.025372 |
| C | 1.496324  | 3.089980  | -1.096837 |
| C | 0.451844  | 3.425776  | 1.159976  |
| C | -1.293096 | -0.578077 | -0.306045 |
| C | -0.984360 | -2.036159 | -0.745010 |
| C | -0.223697 | -2.945318 | 0.252667  |
| C | 0.922464  | -2.205600 | 0.876917  |
| C | 2.082393  | -1.893352 | 0.293103  |
| C | 2.873499  | -0.737893 | 0.849410  |
| C | 2.418447  | 0.580375  | 0.179710  |
| C | 2.570951  | -2.479086 | -1.006146 |
| H | 0.226008  | 0.239187  | -1.578209 |
| H | 0.656485  | 0.819845  | 1.405749  |
| H | -1.591834 | 2.109548  | 0.020047  |
| H | -1.007138 | 2.345050  | -1.625863 |
| H | 1.060863  | 4.033238  | -1.441476 |
| H | 1.603871  | 2.441819  | -1.970894 |
| H | 2.497497  | 3.309492  | -0.714849 |
| H | 0.048580  | 4.392625  | 0.840376  |
| H | 1.421933  | 3.612592  | 1.634273  |
| H | -0.221100 | 3.021671  | 1.922198  |
| H | -0.421856 | -1.985383 | -1.681826 |
| H | -1.947001 | -2.495362 | -0.981164 |
| H | 0.105281  | -3.836749 | -0.288892 |
| H | -0.909784 | -3.303390 | 1.025912  |
| H | 0.703818  | -1.716549 | 1.824541  |
| H | 3.949394  | -0.866454 | 0.685080  |
| H | 2.719416  | -0.661260 | 1.930593  |
| H | 3.031139  | 1.390286  | 0.593477  |
| H | 2.657092  | 0.545256  | -0.888621 |
| H | 2.620922  | -1.721435 | -1.796610 |
| H | 1.943216  | -3.295187 | -1.365505 |
| H | 3.588376  | -2.867204 | -0.883182 |
| C | -1.914723 | -0.479952 | 1.120189  |
| H | -1.599908 | 0.431415  | 1.633990  |
| H | -1.716324 | -1.350719 | 1.741284  |
| O | -3.320025 | -0.465040 | 0.900719  |
| O | -3.403605 | 0.383029  | -0.253604 |
| O | -2.445356 | -0.229111 | -1.150652 |

Rotational constants (GHz): 0.4712000 0.4347000 0.2688900

Vibrational harmonic frequencies (cm-1):

|          |          |          |
|----------|----------|----------|
| 47.7155  | 60.5682  | 74.7303  |
| 84.9456  | 116.5585 | 159.6127 |
| 168.9789 | 192.1509 | 203.7933 |
| 215.6777 | 230.7148 | 254.8414 |
| 267.5379 | 270.2415 | 294.1488 |
| 316.8960 | 320.5279 | 356.8145 |
| 383.1637 | 397.9468 | 406.3408 |
| 413.6265 | 438.6656 | 479.1037 |
| 495.9757 | 527.4507 | 553.1757 |
| 576.6917 | 600.0341 | 651.5640 |
| 709.5067 | 722.5586 | 745.0610 |
| 775.3470 | 795.5586 | 816.2481 |

|           |           |           |
|-----------|-----------|-----------|
| 840.2891  | 869.5872  | 878.7002  |
| 896.4129  | 907.5026  | 918.2261  |
| 925.2252  | 950.5971  | 961.6762  |
| 966.3355  | 978.0010  | 986.1029  |
| 1000.8119 | 1007.7154 | 1012.6559 |
| 1016.4744 | 1037.9656 | 1051.3995 |
| 1063.0813 | 1074.6204 | 1090.7106 |
| 1116.7364 | 1138.7587 | 1157.5523 |
| 1175.2404 | 1185.0536 | 1206.5553 |
| 1225.1170 | 1232.0802 | 1250.4388 |
| 1255.3706 | 1264.0949 | 1270.2536 |
| 1279.1909 | 1284.2847 | 1311.9474 |
| 1328.8186 | 1345.1177 | 1355.4395 |
| 1364.3717 | 1367.5309 | 1381.3082 |
| 1389.5435 | 1402.6692 | 1404.7427 |
| 1421.7577 | 1424.6283 | 1479.5504 |
| 1483.0706 | 1484.9444 | 1488.0339 |
| 1489.8096 | 1494.4000 | 1495.5100 |
| 1498.6029 | 1504.8967 | 1508.7743 |
| 1510.4312 | 1515.7640 | 1735.9353 |
| 3007.8776 | 3009.2335 | 3013.3392 |
| 3017.5667 | 3020.1570 | 3023.0167 |
| 3034.3774 | 3038.0008 | 3043.3286 |
| 3046.0293 | 3054.1551 | 3055.4285 |
| 3062.1785 | 3063.4287 | 3063.8300 |
| 3066.9467 | 3076.2178 | 3079.3244 |
| 3088.0576 | 3088.9199 | 3110.4363 |
| 3113.3764 | 3116.2036 | 3147.7040 |

Zero-point correction (Hartree): 0.367300

POZ-4: MPW1B95

-----  
E(RmPW+HF-B95/6-31+G(d,p)) (Hartree): -811.148305986

Electronic state : 1-A

Cartesian coordinates (Angs):

|   |           |           |           |
|---|-----------|-----------|-----------|
| C | -0.129017 | -0.505002 | -0.606472 |
| C | -1.322936 | -0.252704 | 0.372063  |
| C | -0.510239 | -1.996593 | -0.607846 |
| C | -1.889232 | -1.649868 | -0.026670 |
| C | -2.939828 | -1.594845 | -1.127626 |
| C | -2.376296 | -2.503178 | 1.127677  |
| C | 1.364966  | -0.247080 | -0.315360 |
| C | 1.944269  | 1.105922  | -0.771379 |
| C | 1.896949  | 2.255075  | 0.243669  |
| C | 0.553806  | 2.313116  | 0.894621  |
| C | -0.580112 | 2.668819  | 0.286205  |
| C | -1.880571 | 2.230598  | 0.879408  |
| C | -2.302478 | 0.906986  | 0.232610  |
| C | -0.638343 | 3.286097  | -1.077364 |
| H | -0.356010 | -0.051921 | -1.577398 |
| H | -0.970159 | -0.300759 | 1.410164  |
| H | 0.096484  | -2.569145 | 0.095390  |
| H | -0.484340 | -2.509554 | -1.570071 |
| H | -3.137158 | -2.604901 | -1.494533 |
| H | -2.606036 | -0.996939 | -1.979280 |
| H | -3.886091 | -1.179091 | -0.774064 |
| H | -2.626399 | -3.513083 | 0.792444  |
| H | -3.273344 | -2.073459 | 1.583187  |
| H | -1.612712 | -2.588135 | 1.904779  |
| H | 1.409000  | 1.402683  | -1.677099 |
| H | 2.979377  | 0.920607  | -1.063285 |



|                                          |           |           |           |
|------------------------------------------|-----------|-----------|-----------|
| H                                        | 2.137012  | 3.184279  | -0.279618 |
| H                                        | 2.681146  | 2.127321  | 0.992919  |
| H                                        | 0.463411  | 1.861465  | 1.880669  |
| H                                        | -2.669272 | 2.974411  | 0.731440  |
| H                                        | -1.766931 | 2.082094  | 1.956902  |
| H                                        | -3.248419 | 0.590090  | 0.685874  |
| H                                        | -2.522603 | 1.070985  | -0.826889 |
| H                                        | -0.955403 | 2.555914  | -1.829723 |
| H                                        | 0.322118  | 3.689590  | -1.395932 |
| H                                        | -1.370729 | 4.096872  | -1.098842 |
| C                                        | 1.796509  | -0.663232 | 1.108088  |
| H                                        | 1.013415  | -1.236452 | 1.610555  |
| H                                        | 2.114401  | 0.166956  | 1.733277  |
| O                                        | 2.933807  | -1.471490 | 0.900672  |
| O                                        | 2.505370  | -2.225536 | -0.214285 |
| O                                        | 2.103893  | -1.206035 | -1.121464 |
| Rotational constants (GHz):              | 0.4841800 | 0.4507000 | 0.2799500 |
| Vibrational harmonic frequencies (cm-1): |           |           |           |
| 46.9159                                  | 71.5923   | 93.7625   |           |
| 98.8517                                  | 134.2435  | 159.8339  |           |
| 193.9550                                 | 201.2864  | 218.9526  |           |
| 228.1516                                 | 232.4709  | 264.9939  |           |
| 280.6813                                 | 292.3575  | 308.9339  |           |
| 324.1894                                 | 347.7413  | 357.9116  |           |
| 394.0404                                 | 402.9265  | 409.7088  |           |
| 423.3774                                 | 450.1078  | 483.8848  |           |
| 502.2340                                 | 537.6902  | 556.7285  |           |
| 574.8674                                 | 612.2282  | 667.2272  |           |
| 727.6353                                 | 765.5278  | 789.3026  |           |
| 809.3054                                 | 819.7912  | 828.3426  |           |
| 858.1830                                 | 880.6212  | 894.9523  |           |
| 918.2925                                 | 926.9981  | 936.9314  |           |
| 958.8372                                 | 971.8390  | 977.9929  |           |
| 989.6331                                 | 1000.4793 | 1007.9502 |           |
| 1018.3863                                | 1023.2736 | 1038.5567 |           |
| 1049.8465                                | 1057.7585 | 1058.9404 |           |
| 1081.9858                                | 1099.8665 | 1127.6486 |           |
| 1137.4888                                | 1145.4330 | 1158.6628 |           |
| 1185.3058                                | 1204.3048 | 1229.3224 |           |
| 1233.7234                                | 1236.9095 | 1254.7301 |           |
| 1258.4474                                | 1261.1331 | 1277.5118 |           |
| 1296.1795                                | 1305.3761 | 1326.8233 |           |
| 1335.4724                                | 1357.6334 | 1361.5787 |           |
| 1366.1513                                | 1374.3781 | 1393.0389 |           |
| 1397.7474                                | 1408.6994 | 1413.8333 |           |
| 1423.8401                                | 1435.3232 | 1476.4020 |           |
| 1484.8423                                | 1488.2743 | 1489.2451 |           |
| 1491.9331                                | 1497.0049 | 1499.9364 |           |
| 1511.8810                                | 1512.0772 | 1515.3717 |           |
| 1518.4492                                | 1532.1459 | 1775.7136 |           |
| 3050.0730                                | 3054.9812 | 3055.9954 |           |
| 3057.6373                                | 3065.7479 | 3069.5402 |           |
| 3078.2159                                | 3087.5196 | 3092.4019 |           |
| 3093.1512                                | 3105.0298 | 3108.3108 |           |
| 3120.8864                                | 3123.8707 | 3126.9234 |           |
| 3133.2259                                | 3140.2914 | 3144.1529 |           |
| 3148.5161                                | 3148.9572 | 3164.6357 |           |
| 3165.4432                                | 3175.0516 | 3198.3329 |           |
| Zero-point correction (Hartree):         | 0.373100  |           |           |

TS27

-----  
 E(RB+HF-LYP/6-311G(d,p)) (Hartree): -811.671172266

Electronic state : 1-A

Cartesian coordinates (Angs):

|   |           |           |           |
|---|-----------|-----------|-----------|
| C | 0.424129  | 0.161102  | 0.758792  |
| C | 0.222960  | 1.285023  | -0.333739 |
| C | 1.897167  | 0.606564  | 0.918232  |
| C | 1.617728  | 1.894409  | 0.095862  |
| C | 1.534304  | 3.131313  | 0.997940  |
| C | 2.577288  | 2.152064  | -1.065522 |
| C | 0.251369  | -1.397152 | 0.655584  |
| C | -1.167362 | -2.037867 | 0.857312  |
| C | -2.240120 | -2.009263 | -0.259018 |
| C | -2.307944 | -0.666469 | -0.928802 |
| C | -2.737444 | 0.475232  | -0.384641 |
| C | -2.274875 | 1.775221  | -0.988807 |
| C | -0.973601 | 2.250236  | -0.297104 |
| C | -3.509020 | 0.567440  | 0.906043  |
| H | -0.155507 | 0.432538  | 1.649421  |
| H | 0.316984  | 0.876462  | -1.345947 |
| H | 2.586566  | -0.076176 | 0.423124  |
| H | 2.248272  | 0.748992  | 1.942326  |
| H | 2.527397  | 3.355115  | 1.400320  |
| H | 0.866103  | 2.976156  | 1.849416  |
| H | 1.190917  | 4.017940  | 0.456545  |
| H | 3.572228  | 2.425299  | -0.698128 |
| H | 2.222332  | 2.971042  | -1.701661 |
| H | 2.688914  | 1.261638  | -1.690836 |
| H | -1.569111 | -1.524820 | 1.737350  |
| H | -0.971392 | -3.069002 | 1.160495  |
| H | -3.195809 | -2.288333 | 0.196810  |
| H | -2.035540 | -2.785660 | -1.002133 |
| H | -1.797191 | -0.586914 | -1.885710 |
| H | -3.033311 | 2.560743  | -0.893225 |
| H | -2.082069 | 1.641929  | -2.058272 |
| H | -0.664913 | 3.183800  | -0.781928 |
| H | -1.194459 | 2.516309  | 0.742011  |
| H | -2.933793 | 1.077559  | 1.686878  |
| H | -3.806609 | -0.408205 | 1.291998  |
| H | -4.418423 | 1.159712  | 0.754428  |
| C | 0.688436  | -1.951018 | -1.118074 |
| H | 0.301002  | -1.255536 | -1.851850 |
| H | 0.265843  | -2.947493 | -1.057229 |
| O | 2.012717  | -1.908469 | -1.053010 |
| O | 2.460550  | -2.776047 | -0.159028 |
| O | 1.158417  | -2.025997 | 1.310968  |

Rotational constants (GHz): 0.4716400 0.4345200 0.2753600

Vibrational harmonic frequencies (cm-1):

|           |          |          |
|-----------|----------|----------|
| -410.6785 | 33.8036  | 48.5390  |
| 88.4261   | 99.7012  | 123.7941 |
| 156.7758  | 170.4732 | 173.1089 |
| 202.0732  | 215.9478 | 231.9197 |
| 255.4787  | 258.6608 | 267.1851 |
| 288.6935  | 294.8548 | 316.8449 |
| 332.6405  | 351.4302 | 386.0946 |
| 397.0687  | 406.9083 | 442.6141 |
| 484.9105  | 495.8938 | 502.3017 |
| 523.2887  | 543.9417 | 564.1097 |
| 595.0036  | 609.5277 | 615.4217 |
| 720.7518  | 751.8059 | 811.4310 |

|           |           |           |
|-----------|-----------|-----------|
| 816.8928  | 850.0325  | 871.7347  |
| 884.1893  | 887.4547  | 896.6186  |
| 923.6835  | 946.5868  | 954.9863  |
| 972.1405  | 979.6500  | 988.0492  |
| 997.1738  | 1006.8100 | 1029.2850 |
| 1034.6173 | 1043.3720 | 1062.2419 |
| 1066.4061 | 1075.9424 | 1102.8855 |
| 1108.6203 | 1137.9433 | 1157.1322 |
| 1173.7743 | 1199.0139 | 1203.3554 |
| 1226.8779 | 1232.8612 | 1240.9732 |
| 1246.9974 | 1254.4137 | 1258.0551 |
| 1278.7869 | 1282.9958 | 1297.2739 |
| 1316.0050 | 1333.3643 | 1348.4142 |
| 1354.0585 | 1363.1647 | 1378.3608 |
| 1396.9637 | 1399.9819 | 1404.1356 |
| 1421.6346 | 1423.3073 | 1473.9359 |
| 1479.4466 | 1483.0350 | 1486.6954 |
| 1487.4634 | 1488.6367 | 1491.7822 |
| 1496.7164 | 1498.0832 | 1509.4700 |
| 1510.6835 | 1511.1914 | 1732.2576 |
| 3007.2524 | 3008.5582 | 3011.4305 |
| 3014.0478 | 3018.0058 | 3020.8684 |
| 3022.4704 | 3027.7188 | 3033.6851 |
| 3044.0034 | 3055.5315 | 3056.8416 |
| 3062.0185 | 3062.4956 | 3065.5366 |
| 3077.1079 | 3080.9717 | 3087.2604 |
| 3088.5019 | 3112.3822 | 3120.7716 |
| 3123.8316 | 3126.4927 | 3251.9149 |

Zero-point correction (Hartree): 0.364096

## TS26

-----  
E(RB+HF-LYP/6-311G(d,p)) (Hartree): -811.676870756

Electronic state : 1-A

Cartesian coordinates (Angs):

|   |           |           |           |
|---|-----------|-----------|-----------|
| C | -0.352269 | -0.557507 | -0.665221 |
| C | -1.427698 | 0.010880  | 0.346671  |
| C | -1.118832 | -1.908759 | -0.668227 |
| C | -2.344482 | -1.227450 | -0.003117 |
| C | -3.445199 | -0.939867 | -1.032098 |
| C | -2.931677 | -1.949403 | 1.208488  |
| C | 1.157479  | -0.647434 | -0.417331 |
| C | 2.086988  | 0.524960  | -0.762383 |
| C | 2.339968  | 1.625639  | 0.292951  |
| C | 1.044089  | 2.094275  | 0.897053  |
| C | 0.049943  | 2.714130  | 0.253917  |
| C | -1.344079 | 2.604212  | 0.813683  |
| C | -2.073629 | 1.396250  | 0.174655  |
| C | 0.182650  | 3.358653  | -1.101850 |
| H | -0.476814 | -0.048989 | -1.628301 |
| H | -1.068902 | -0.098727 | 1.374704  |
| H | -0.650464 | -2.651134 | -0.021090 |
| H | -1.280744 | -2.368511 | -1.645210 |
| H | -3.891941 | -1.883703 | -1.359983 |
| H | -3.059718 | -0.435508 | -1.922441 |
| H | -4.246783 | -0.322903 | -0.616730 |
| H | -3.421218 | -2.882120 | 0.909467  |
| H | -3.681136 | -1.329959 | 1.713275  |
| H | -2.156217 | -2.198954 | 1.938385  |
| H | 1.642446  | 0.988406  | -1.650418 |
| H | 3.039868  | 0.083948  | -1.052803 |

|                                          |           |           |           |
|------------------------------------------|-----------|-----------|-----------|
| H                                        | 2.886399  | 2.435317  | -0.201187 |
| H                                        | 3.006357  | 1.235011  | 1.065008  |
| H                                        | 0.821861  | 1.724458  | 1.895153  |
| H                                        | -1.934528 | 3.508481  | 0.625921  |
| H                                        | -1.302238 | 2.464098  | 1.898433  |
| H                                        | -3.075594 | 1.344582  | 0.616525  |
| H                                        | -2.231486 | 1.594266  | -0.890673 |
| H                                        | -0.400143 | 2.832661  | -1.867138 |
| H                                        | 1.216880  | 3.412230  | -1.443377 |
| H                                        | -0.209154 | 4.381363  | -1.065101 |
| C                                        | 1.594732  | -1.229203 | 1.331124  |
| H                                        | 0.761946  | -1.913353 | 1.558128  |
| H                                        | 1.490238  | -0.232731 | 1.777672  |
| O                                        | 2.771650  | -1.709558 | 1.239042  |
| O                                        | 2.864840  | -2.062111 | -0.781484 |
| O                                        | 1.577658  | -1.835141 | -0.959821 |
| Rotational constants (GHz):              | 0.4873800 | 0.4090500 | 0.2707900 |
| Vibrational harmonic frequencies (cm-1): |           |           |           |
| -434.9555                                | 51.3771   | 65.4886   |           |
| 92.4286                                  | 99.0088   | 130.6512  |           |
| 156.3917                                 | 164.3760  | 180.3498  |           |
| 194.9216                                 | 231.1622  | 239.0265  |           |
| 253.7791                                 | 272.4448  | 279.9306  |           |
| 298.0188                                 | 307.7556  | 318.0307  |           |
| 340.6432                                 | 355.3841  | 378.4938  |           |
| 399.8690                                 | 406.1460  | 425.8672  |           |
| 459.6297                                 | 487.1223  | 512.0789  |           |
| 539.0126                                 | 551.7212  | 561.0491  |           |
| 588.5584                                 | 613.5354  | 672.4884  |           |
| 731.5735                                 | 752.7064  | 807.4965  |           |
| 821.3472                                 | 848.5395  | 856.2670  |           |
| 881.5929                                 | 897.3645  | 906.2023  |           |
| 926.8193                                 | 952.4965  | 960.7105  |           |
| 971.7458                                 | 984.8894  | 986.6072  |           |
| 996.1530                                 | 1006.9275 | 1029.9607 |           |
| 1035.9475                                | 1059.4135 | 1074.4499 |           |
| 1084.0225                                | 1106.5720 | 1125.0049 |           |
| 1138.1298                                | 1150.3632 | 1160.4311 |           |
| 1182.2533                                | 1195.1915 | 1207.3629 |           |
| 1210.7364                                | 1228.0307 | 1233.3060 |           |
| 1248.9420                                | 1255.8460 | 1263.6430 |           |
| 1283.0651                                | 1302.0781 | 1310.2629 |           |
| 1324.3573                                | 1349.4936 | 1358.6051 |           |
| 1370.0928                                | 1374.4826 | 1382.6523 |           |
| 1387.9174                                | 1402.2640 | 1405.1173 |           |
| 1422.1309                                | 1423.6990 | 1470.8385 |           |
| 1479.0370                                | 1485.0810 | 1486.5843 |           |
| 1488.8514                                | 1492.4959 | 1497.6292 |           |
| 1499.2014                                | 1507.9739 | 1509.9560 |           |
| 1512.6974                                | 1539.0564 | 1727.4235 |           |
| 2944.6829                                | 3011.0595 | 3011.3205 |           |
| 3012.6959                                | 3013.5996 | 3020.4109 |           |
| 3025.5117                                | 3027.6077 | 3033.3470 |           |
| 3037.5542                                | 3038.7350 | 3048.5522 |           |
| 3053.5047                                | 3060.9199 | 3065.8477 |           |
| 3070.3618                                | 3081.6529 | 3082.8930 |           |
| 3083.1966                                | 3091.0328 | 3111.4516 |           |
| 3112.3611                                | 3118.8857 | 3127.0328 |           |
| Zero-point correction (Hartree):         | 0.364468  |           |           |

TS28

```

-----
E(RB+HF-LYP/6-311G(d,p)) (Hartree): -811.671377448
Electronic state : 1-A
Cartesian coordinates (Angs):
  C      0.282047    -0.493174     0.741820
  C      1.376808    -0.197050    -0.356932
  C      0.806296    -1.941257     0.855811
  C      2.065056    -1.570753     0.022373
  C      3.310361    -1.449312     0.908606
  C      2.358815    -2.479763    -1.170856
  C     -1.294789    -0.390676     0.668930
  C     -1.999267     0.983450     0.883340
  C     -2.050850     2.048049    -0.238627
  C     -0.712827     2.223911    -0.900981
  C      0.398412     2.709257    -0.340131
  C      1.727357     2.339348    -0.946940
  C      2.273914     1.050270    -0.286457
  C      0.436538     3.451214     0.970593
  H      0.526080     0.076126     1.645864
  H      0.962772    -0.277104    -1.367918
  H      0.151121    -2.662181     0.362539
  H      0.981013    -2.309708     1.868557
  H      3.595199    -2.440791     1.274673
  H      3.133807    -0.817848     1.783305
  H      4.166595    -1.039885     0.364470
  H      2.681950    -3.471947    -0.838679
  H      3.154463    -2.064050    -1.799124
  H      1.473818    -2.614264    -1.800518
  H     -1.505150     1.420007     1.758685
  H     -3.015220     0.732871     1.195592
  H     -2.413141     2.982055     0.203791
  H     -2.802351     1.762782    -0.980421
  H     -0.593552     1.749767    -1.873005
  H      2.467521     3.138711    -0.826195
  H      1.611838     2.166997    -2.021974
  H      3.223772     0.806362    -0.776266
  H      2.525677     1.259266     0.758693
  H      0.962542     2.882681     1.746075
  H     -0.558145     3.691424     1.347303
  H      0.985426     4.391985     0.850302
  C     -1.679561    -0.948519    -1.117128
  H     -0.990613    -1.783658    -1.166699
  H     -1.566861    -0.129597    -1.814982
  O     -2.952350    -1.283965    -0.953991
  O     -3.063686    -2.307648    -0.124146
  O     -1.852518    -1.340883     1.321314
Rotational constants (GHz):   0.4708900   0.4185700   0.2676900
Vibrational harmonic frequencies (cm-1):
-407.8898      46.1698      67.7334
 69.8875      92.1820     118.5751
160.2317     164.0243     183.6817
202.0007     214.2695     226.1928
251.8735     260.2808     266.4349
274.4898     292.8842     305.0187
333.9954     354.9866     390.9569
398.7479     410.9306     446.3203
471.6551     491.5696     494.6649
531.3421     550.8942     561.9739
594.6660     596.7300     633.1266
724.1229     751.8855     802.8606
815.9842     845.8507     863.6136

```

|           |           |           |
|-----------|-----------|-----------|
| 887.0010  | 892.7901  | 903.4585  |
| 924.1804  | 946.4068  | 953.9127  |
| 971.2698  | 982.3760  | 987.7444  |
| 997.7841  | 1005.1748 | 1030.0785 |
| 1038.2180 | 1042.7264 | 1061.1513 |
| 1072.5284 | 1079.2422 | 1097.4628 |
| 1106.3991 | 1132.4145 | 1159.1393 |
| 1173.8882 | 1199.4766 | 1200.8276 |
| 1227.1248 | 1232.2163 | 1245.8984 |
| 1249.3207 | 1252.6978 | 1261.0554 |
| 1271.0109 | 1280.9222 | 1293.3324 |
| 1311.1552 | 1332.7938 | 1351.1121 |
| 1358.7144 | 1364.9925 | 1380.4683 |
| 1397.8863 | 1402.4578 | 1413.2138 |
| 1421.1517 | 1422.8340 | 1472.6490 |
| 1476.6507 | 1479.9341 | 1485.3037 |
| 1486.9673 | 1489.5238 | 1493.9499 |
| 1496.3501 | 1500.8173 | 1508.7408 |
| 1510.9589 | 1513.4177 | 1730.5636 |
| 3007.9907 | 3009.9819 | 3014.1858 |
| 3017.9199 | 3019.6489 | 3023.4169 |
| 3024.6878 | 3028.2816 | 3030.7727 |
| 3044.8208 | 3055.2687 | 3056.0332 |
| 3060.1600 | 3062.2036 | 3067.9998 |
| 3074.5832 | 3078.9681 | 3089.8729 |
| 3090.2629 | 3097.5355 | 3112.6535 |
| 3116.5972 | 3131.1884 | 3260.9678 |

Zero-point correction (Hartree): 0.364053

## TS29

-----

E(RB+HF-LYP/6-311G(d,p)) (Hartree): -811.671674832

Electronic state : 1-A

Cartesian coordinates (Angs):

|   |           |           |           |
|---|-----------|-----------|-----------|
| C | -0.641151 | 0.028694  | -0.624646 |
| C | -0.192529 | 1.269793  | 0.254107  |
| C | -2.110024 | 0.497891  | -0.415388 |
| C | -1.605686 | 1.906671  | -0.025155 |
| C | -1.635600 | 2.866984  | -1.222211 |
| C | -2.272135 | 2.554033  | 1.187048  |
| C | -0.268394 | -1.457796 | -0.423035 |
| C | 1.146203  | -1.959789 | -0.745100 |
| C | 2.213798  | -1.957100 | 0.377972  |
| C | 2.323127  | -0.579628 | 0.962581  |
| C | 2.812087  | 0.490560  | 0.329005  |
| C | 2.324769  | 1.853198  | 0.740355  |
| C | 1.021102  | 2.172645  | -0.032705 |
| C | 3.652830  | 0.435075  | -0.920555 |
| H | -0.338487 | 0.222975  | -1.663024 |
| H | -0.175008 | 0.970430  | 1.306981  |
| H | -2.573244 | -0.018289 | 0.422582  |
| H | -2.772197 | 0.420847  | -1.277665 |
| H | -2.674322 | 3.088053  | -1.486370 |
| H | -1.157486 | 2.443199  | -2.109918 |
| H | -1.143787 | 3.818358  | -0.999775 |
| H | -3.301346 | 2.849193  | 0.957541  |
| H | -1.733883 | 3.455363  | 1.501833  |
| H | -2.305532 | 1.865333  | 2.035882  |
| H | 1.527081  | -1.352319 | -1.572747 |
| H | 1.027051  | -2.979020 | -1.122934 |
| H | 3.152812  | -2.295527 | -0.069739 |

|                                          |           |           |           |
|------------------------------------------|-----------|-----------|-----------|
| H                                        | 1.960142  | -2.690414 | 1.146114  |
| H                                        | 1.760307  | -0.406930 | 1.876212  |
| H                                        | 3.065515  | 2.633075  | 0.532113  |
| H                                        | 2.118061  | 1.880185  | 1.814992  |
| H                                        | 0.726786  | 3.195406  | 0.229515  |
| H                                        | 1.228201  | 2.193183  | -1.108042 |
| H                                        | 3.137544  | 0.883159  | -1.778107 |
| H                                        | 3.943803  | -0.579283 | -1.194898 |
| H                                        | 4.569933  | 1.016625  | -0.773981 |
| C                                        | -0.857125 | -1.981691 | 1.327405  |
| H                                        | -0.496325 | -1.061724 | 1.812894  |
| H                                        | -0.222419 | -2.865809 | 1.487386  |
| O                                        | -2.116032 | -2.153610 | 1.246208  |
| O                                        | -2.382201 | -2.179280 | -0.789798 |
| O                                        | -1.100620 | -2.357525 | -1.029525 |
| Rotational constants (GHz):              | 0.4763400 | 0.4272700 | 0.2742800 |
| Vibrational harmonic frequencies (cm-1): |           |           |           |
| -425.2497                                | 43.7018   |           | 66.8442   |
| 84.8488                                  | 127.4910  |           | 153.6063  |
| 156.5695                                 | 162.1809  |           | 170.6846  |
| 194.1104                                 | 217.7545  |           | 219.8087  |
| 245.4913                                 | 258.1778  |           | 263.5943  |
| 275.6153                                 | 299.2904  |           | 327.2775  |
| 352.7247                                 | 355.5174  |           | 373.9114  |
| 389.2556                                 | 414.7975  |           | 428.0316  |
| 456.9883                                 | 488.2828  |           | 509.8893  |
| 526.1910                                 | 542.4634  |           | 558.6327  |
| 583.0859                                 | 593.0408  |           | 654.3243  |
| 720.2230                                 | 757.4098  |           | 807.0549  |
| 822.0161                                 | 850.7632  |           | 870.2674  |
| 892.3243                                 | 897.0675  |           | 910.5241  |
| 930.8118                                 | 942.3025  |           | 952.8805  |
| 974.5820                                 | 978.9561  |           | 988.7186  |
| 997.1141                                 | 1008.6147 |           | 1027.6862 |
| 1036.7698                                | 1059.4454 |           | 1073.3039 |
| 1094.2417                                | 1107.4973 |           | 1125.8151 |
| 1142.7760                                | 1155.6398 |           | 1158.1388 |
| 1179.9635                                | 1182.3940 |           | 1200.4388 |
| 1212.4242                                | 1229.8088 |           | 1233.0113 |
| 1248.3148                                | 1253.5881 |           | 1263.8813 |
| 1283.8665                                | 1297.7809 |           | 1310.0712 |
| 1327.0229                                | 1345.1003 |           | 1356.3509 |
| 1369.2173                                | 1372.1554 |           | 1387.1997 |
| 1388.1619                                | 1400.8861 |           | 1405.4839 |
| 1418.3623                                | 1423.2690 |           | 1476.8087 |
| 1479.0918                                | 1485.6722 |           | 1486.3818 |
| 1488.2781                                | 1492.9493 |           | 1497.7812 |
| 1505.0911                                | 1509.6414 |           | 1510.1885 |
| 1510.7572                                | 1538.7510 |           | 1728.2156 |
| 2934.8911                                | 2993.2320 |           | 3001.4967 |
| 3009.9839                                | 3012.8126 |           | 3014.2550 |
| 3021.4163                                | 3024.9991 |           | 3028.8610 |
| 3031.4116                                | 3044.4533 |           | 3048.3192 |
| 3053.6442                                | 3065.6283 |           | 3067.5853 |
| 3073.2370                                | 3079.6901 |           | 3081.1991 |
| 3083.4165                                | 3087.2912 |           | 3088.1845 |
| 3113.0218                                | 3136.0208 |           | 3142.6955 |
| Zero-point correction (Hartree):         | 0.364081  |           |           |

CI-3

-----

E(RB+HF-LYP/6-311G(d,p)) (Hartree): -697.190567154

Electronic state : 1-A

Cartesian coordinates (Angs):

|   |           |           |           |
|---|-----------|-----------|-----------|
| C | 0.505274  | -0.570596 | 0.760704  |
| C | 1.148337  | 0.352115  | -0.360942 |
| C | 1.845260  | -1.360993 | 0.792292  |
| C | 2.563047  | -0.186215 | 0.067907  |
| C | 3.298121  | 0.720065  | 1.062899  |
| C | 3.487544  | -0.572764 | -1.084142 |
| C | -0.752119 | -1.320566 | 0.457755  |
| C | -2.095824 | -1.035114 | 1.043996  |
| C | -3.021280 | -0.283400 | 0.028946  |
| C | -2.159691 | 0.646881  | -0.784972 |
| C | -1.609376 | 1.795274  | -0.375089 |
| C | -0.394392 | 2.329641  | -1.096490 |
| C | 0.916110  | 1.865503  | -0.408858 |
| C | -2.019202 | 2.533808  | 0.874009  |
| H | 0.355767  | 0.001996  | 1.677903  |
| H | 0.898005  | -0.088210 | -1.331478 |
| H | 1.788830  | -2.254025 | 0.169205  |
| H | 2.216702  | -1.636519 | 1.781817  |
| H | 4.176030  | 0.200149  | 1.458655  |
| H | 2.671522  | 0.999457  | 1.914805  |
| H | 3.646312  | 1.641809  | 0.588173  |
| H | 4.382572  | -1.083331 | -0.713236 |
| H | 3.819569  | 0.311327  | -1.639296 |
| H | 2.985754  | -1.243431 | -1.786891 |
| H | -1.958505 | -0.426329 | 1.939910  |
| H | -2.548483 | -1.997778 | 1.302826  |
| H | -3.804355 | 0.231845  | 0.590172  |
| H | -3.489721 | -1.023726 | -0.616215 |
| H | -1.792722 | 0.216583  | -1.715093 |
| H | -0.400562 | 3.425434  | -1.128155 |
| H | -0.392962 | 1.977852  | -2.132928 |
| H | 1.755918  | 2.310740  | -0.956808 |
| H | 0.968214  | 2.282102  | 0.602755  |
| H | -1.204631 | 2.580035  | 1.606111  |
| H | -2.885682 | 2.087777  | 1.363279  |
| H | -2.271905 | 3.571816  | 0.629244  |
| O | -1.764938 | -2.941003 | -0.789309 |
| O | -0.633376 | -2.254922 | -0.394797 |

Rotational constants (GHz): 0.6852300 0.4651000 0.3307400

Vibrational harmonic frequencies (cm-1):

|           |           |           |
|-----------|-----------|-----------|
| 44.6299   | 54.8066   | 71.2537   |
| 116.4949  | 154.5262  | 159.8081  |
| 182.3486  | 203.8977  | 220.0375  |
| 233.5453  | 261.9595  | 281.6552  |
| 289.1429  | 298.5692  | 310.3795  |
| 337.8614  | 343.3537  | 354.2324  |
| 400.4202  | 421.7969  | 433.7099  |
| 455.2994  | 493.7189  | 549.4797  |
| 555.0173  | 579.8773  | 614.8912  |
| 675.7204  | 747.1835  | 769.1798  |
| 811.1971  | 818.5789  | 842.3501  |
| 865.9470  | 896.5239  | 901.0855  |
| 917.0841  | 932.4426  | 945.8365  |
| 954.8027  | 966.0994  | 979.4302  |
| 999.7815  | 1005.5900 | 1013.4121 |
| 1032.9118 | 1036.0074 | 1061.6791 |
| 1076.4960 | 1101.7465 | 1133.0797 |
| 1160.0454 | 1167.4958 | 1188.2050 |



|           |           |           |
|-----------|-----------|-----------|
| 1194.3593 | 1210.8366 | 1226.5586 |
| 1237.9901 | 1251.9022 | 1256.0387 |
| 1257.1879 | 1283.5848 | 1313.4719 |
| 1325.6873 | 1331.3377 | 1349.0347 |
| 1362.2385 | 1378.2399 | 1391.9384 |
| 1396.7242 | 1405.6802 | 1420.2657 |
| 1421.9989 | 1455.1522 | 1477.7914 |
| 1484.5762 | 1484.8540 | 1487.1225 |
| 1489.7503 | 1495.6237 | 1497.8647 |
| 1504.5915 | 1510.2528 | 1510.7705 |
| 1526.5445 | 1725.1328 | 3007.4364 |
| 3011.5023 | 3012.3908 | 3018.6946 |
| 3022.0670 | 3034.6398 | 3035.0307 |
| 3045.7890 | 3051.2054 | 3055.6375 |
| 3056.3287 | 3065.2815 | 3070.5355 |
| 3073.7282 | 3081.4657 | 3085.7156 |
| 3087.0261 | 3097.5403 | 3113.0223 |
| 3117.0086 | 3119.7440 | 3136.6523 |

Zero-point correction (Hartree): 0.333720

#### CI-4

-----  
E(RB+HF-LYP/6-311G(d,p)) (Hartree): -697.187936905

Electronic state : 1-A

Cartesian coordinates (Angs):

|   |           |           |           |
|---|-----------|-----------|-----------|
| C | 0.393515  | -0.433051 | 0.765326  |
| C | 0.961658  | 0.506594  | -0.373750 |
| C | 1.857700  | -0.886257 | 1.080809  |
| C | 2.410933  | 0.282568  | 0.209766  |
| C | 2.941367  | 1.431775  | 1.073725  |
| C | 3.446622  | -0.126125 | -0.836126 |
| C | -0.603626 | -1.485595 | 0.439879  |
| C | -1.988762 | -1.538492 | 1.040581  |
| C | -3.039120 | -0.930746 | 0.049115  |
| C | -2.358494 | 0.119534  | -0.794927 |
| C | -2.028106 | 1.362405  | -0.427090 |
| C | -0.948593 | 2.092264  | -1.193058 |
| C | 0.434576  | 1.938592  | -0.506672 |
| C | -2.557579 | 2.052435  | 0.803786  |
| H | -0.012648 | 0.168622  | 1.579892  |
| H | 0.886760  | -0.017415 | -1.326662 |
| H | 2.079987  | -1.862389 | 0.658309  |
| H | 2.118104  | -0.861828 | 2.141635  |
| H | 3.864355  | 1.120752  | 1.573463  |
| H | 2.233356  | 1.730271  | 1.852676  |
| H | 3.173192  | 2.317275  | 0.474376  |
| H | 4.387929  | -0.420943 | -0.359136 |
| H | 3.667478  | 0.704022  | -1.516837 |
| H | 3.081818  | -0.969502 | -1.425301 |
| H | -1.982720 | -0.963029 | 1.967993  |
| H | -2.245837 | -2.572781 | 1.282484  |
| H | -3.886767 | -0.543464 | 0.619301  |
| H | -3.419629 | -1.728257 | -0.591989 |
| H | -1.919954 | -0.257699 | -1.716300 |
| H | -1.178080 | 3.161104  | -1.276778 |
| H | -0.885023 | 1.694633  | -2.210354 |
| H | 1.162620  | 2.506473  | -1.098591 |
| H | 0.407650  | 2.423229  | 0.475376  |
| H | -1.751024 | 2.325611  | 1.493165  |

|                                          |           |           |           |  |
|------------------------------------------|-----------|-----------|-----------|--|
| H                                        | -3.279111 | 1.446315  | 1.352966  |  |
| H                                        | -3.052433 | 2.989277  | 0.523285  |  |
| O                                        | 0.771327  | -2.428072 | -1.151573 |  |
| O                                        | -0.394148 | -2.410138 | -0.406071 |  |
| Rotational constants (GHz):              | 0.7270200 | 0.4740900 | 0.3525800 |  |
| Vibrational harmonic frequencies (cm-1): |           |           |           |  |
| 43.4919                                  | 67.3500   |           | 73.2934   |  |
| 101.8595                                 | 147.1429  |           | 163.8936  |  |
| 188.5922                                 | 202.1832  |           | 211.4917  |  |
| 242.1910                                 | 268.3786  |           | 274.0408  |  |
| 281.0215                                 | 291.9193  |           | 304.8096  |  |
| 335.7739                                 | 351.0170  |           | 382.7384  |  |
| 393.5857                                 | 397.6362  |           | 445.4220  |  |
| 458.3936                                 | 490.5906  |           | 534.1752  |  |
| 562.7067                                 | 581.4031  |           | 608.5576  |  |
| 686.5393                                 | 742.8889  |           | 750.9670  |  |
| 811.1251                                 | 821.5786  |           | 862.5977  |  |
| 872.7497                                 | 886.3374  |           | 908.5238  |  |
| 913.7775                                 | 922.5075  |           | 932.3455  |  |
| 949.1013                                 | 966.6705  |           | 971.8489  |  |
| 996.9374                                 | 1000.0963 |           | 1014.9005 |  |
| 1029.0029                                | 1040.4637 |           | 1060.9675 |  |
| 1075.2443                                | 1097.4783 |           | 1133.0873 |  |
| 1155.8886                                | 1180.8790 |           | 1192.9420 |  |
| 1197.2565                                | 1208.7931 |           | 1226.5012 |  |
| 1234.9570                                | 1248.6603 |           | 1256.7094 |  |
| 1265.1205                                | 1284.1613 |           | 1313.8984 |  |
| 1320.2975                                | 1341.4639 |           | 1349.7572 |  |
| 1360.0279                                | 1381.4004 |           | 1397.2595 |  |
| 1399.6247                                | 1407.7987 |           | 1415.6933 |  |
| 1420.6441                                | 1472.8678 |           | 1474.9344 |  |
| 1478.9359                                | 1486.5068 |           | 1488.0125 |  |
| 1492.9685                                | 1494.1528 |           | 1496.6573 |  |
| 1505.4714                                | 1507.0522 |           | 1515.7898 |  |
| 1528.2751                                | 1724.6298 |           | 3008.7861 |  |
| 3009.3459                                | 3014.3741 |           | 3017.2014 |  |
| 3021.9679                                | 3043.6911 |           | 3049.8450 |  |
| 3052.8619                                | 3055.4472 |           | 3056.8434 |  |
| 3062.7720                                | 3067.3480 |           | 3072.7759 |  |
| 3076.6126                                | 3082.2800 |           | 3087.2222 |  |
| 3099.0971                                | 3105.7114 |           | 3108.1235 |  |
| 3110.4247                                | 3127.4961 |           | 3150.4632 |  |
| Zero-point correction (Hartree):         | 0.333884  |           |           |  |

### beta-nocaryophyllone

-----  
E(RB+HF-LYP/6-311G(d,p)) (Hartree): -622.087215309

Electronic state : 1-A

Cartesian coordinates (Angs):

|   |           |           |           |
|---|-----------|-----------|-----------|
| C | 0.470600  | -0.764919 | 0.643294  |
| C | 0.979716  | 0.361632  | -0.344587 |
| C | 1.916563  | -1.328743 | 0.656522  |
| C | 2.458457  | -0.000943 | 0.055409  |
| C | 3.052731  | 0.904368  | 1.140700  |
| C | 3.431104  | -0.140028 | -1.113932 |
| C | -0.599679 | -1.730427 | 0.141178  |
| C | -2.011901 | -1.669696 | 0.735436  |
| C | -2.990016 | -0.975720 | -0.257919 |
| C | -2.282422 | 0.197149  | -0.889653 |
| C | -1.949931 | 1.347660  | -0.294710 |
| C | -0.828554 | 2.174837  | -0.877247 |

|                                          |           |           |           |
|------------------------------------------|-----------|-----------|-----------|
| C                                        | 0.528480  | 1.820957  | -0.214657 |
| C                                        | -2.506725 | 1.811850  | 1.027022  |
| H                                        | 0.180261  | -0.333157 | 1.603679  |
| H                                        | 0.807394  | 0.011971  | -1.367895 |
| H                                        | 1.996533  | -2.162338 | -0.043192 |
| H                                        | 2.315157  | -1.629217 | 1.628604  |
| H                                        | 3.990690  | 0.475330  | 1.507450  |
| H                                        | 2.384547  | 1.013331  | 1.999700  |
| H                                        | 3.274640  | 1.905545  | 0.759398  |
| H                                        | 4.392044  | -0.545665 | -0.779290 |
| H                                        | 3.628508  | 0.830371  | -1.583258 |
| H                                        | 3.032891  | -0.810829 | -1.880061 |
| H                                        | -1.998945 | -1.118524 | 1.678816  |
| H                                        | -2.338212 | -2.693889 | 0.936921  |
| H                                        | -3.902201 | -0.691403 | 0.273631  |
| H                                        | -3.277060 | -1.691909 | -1.030171 |
| H                                        | -1.819885 | -0.016457 | -1.850618 |
| H                                        | -1.013298 | 3.247510  | -0.745739 |
| H                                        | -0.753443 | 1.990619  | -1.953535 |
| H                                        | 1.297588  | 2.451260  | -0.677999 |
| H                                        | 0.506324  | 2.108448  | 0.842012  |
| H                                        | -1.726716 | 1.882945  | 1.793750  |
| H                                        | -3.292744 | 1.158132  | 1.406781  |
| H                                        | -2.929561 | 2.817667  | 0.922733  |
| O                                        | -0.345632 | -2.530950 | -0.735356 |
| Rotational constants (GHz):              | 0.8759000 | 0.4941000 | 0.3782800 |
| Vibrational harmonic frequencies (cm-1): |           |           |           |
| 50.3439                                  | 56.9878   |           | 84.9034   |
| 110.1279                                 | 157.7444  |           | 169.6033  |
| 198.4210                                 | 210.6209  |           | 228.7445  |
| 233.7909                                 | 261.9368  |           | 280.2903  |
| 288.0362                                 | 297.1993  |           | 325.9079  |
| 356.6552                                 | 395.1164  |           | 404.5990  |
| 436.9710                                 | 444.0319  |           | 489.3504  |
| 542.1412                                 | 558.9786  |           | 584.0333  |
| 603.3578                                 | 688.9533  |           | 745.6699  |
| 761.3917                                 | 815.9841  |           | 823.1196  |
| 862.9872                                 | 874.5852  |           | 900.1279  |
| 912.3324                                 | 918.4773  |           | 935.5416  |
| 953.6205                                 | 961.7022  |           | 972.5614  |
| 994.0203                                 | 1002.1138 |           | 1009.2057 |
| 1033.2570                                | 1035.5107 |           | 1061.0394 |
| 1070.2503                                | 1100.9392 |           | 1103.5314 |
| 1137.0689                                | 1166.7918 |           | 1176.0614 |
| 1195.3721                                | 1209.1155 |           | 1213.9645 |
| 1226.7268                                | 1245.9847 |           | 1253.8474 |
| 1255.2994                                | 1281.7129 |           | 1309.5697 |
| 1326.8103                                | 1329.9797 |           | 1345.0095 |
| 1358.6716                                | 1364.3303 |           | 1386.5490 |
| 1397.0648                                | 1404.7906 |           | 1420.3853 |
| 1421.1802                                | 1476.2457 |           | 1478.4419 |
| 1483.5802                                | 1486.0898 |           | 1488.4071 |
| 1489.9527                                | 1495.2945 |           | 1497.3330 |
| 1505.0437                                | 1507.5043 |           | 1509.1446 |
| 1726.6387                                | 1768.6720 |           | 3005.6258 |
| 3008.9653                                | 3011.6396 |           | 3017.2293 |
| 3020.5397                                | 3031.6961 |           | 3038.8061 |
| 3042.8836                                | 3047.2659 |           | 3047.7171 |
| 3052.1541                                | 3062.4628 |           | 3064.7344 |
| 3066.2132                                | 3077.4520 |           | 3081.2218 |
| 3084.1717                                | 3085.6714 |           | 3098.1416 |

3109.4829                      3111.0774                      3131.0738  
 Zero-point correction (Hartree): 0.330201

**TS30**

-----  
 E(RB+HF-LYP/6-311G(d,p)) (Hartree): -697.154819296  
 Electronic state : 1-A

Cartesian coordinates (Angs):

|   |           |           |           |
|---|-----------|-----------|-----------|
| C | 0.551922  | -0.646417 | 0.760232  |
| C | 1.148086  | 0.362874  | -0.320348 |
| C | 1.880150  | -1.441283 | 0.669402  |
| C | 2.574717  | -0.208029 | 0.023177  |
| C | 3.330933  | 0.617724  | 1.071126  |
| C | 3.466709  | -0.488159 | -1.183663 |
| C | -0.741554 | -1.298414 | 0.432344  |
| C | -2.044374 | -0.994934 | 0.905300  |
| C | -3.002906 | -0.255040 | -0.094272 |
| C | -2.155028 | 0.742724  | -0.847415 |
| C | -1.608119 | 1.858846  | -0.352128 |
| C | -0.351540 | 2.409384  | -0.983153 |
| C | 0.920777  | 1.879054  | -0.265741 |
| C | -2.043324 | 2.509542  | 0.936084  |
| H | 0.437711  | -0.135182 | 1.718384  |
| H | 0.867211  | -0.011181 | -1.310303 |
| H | 1.795211  | -2.276781 | -0.026417 |
| H | 2.291044  | -1.804637 | 1.613729  |
| H | 4.214475  | 0.067656  | 1.409369  |
| H | 2.719761  | 0.830313  | 1.952812  |
| H | 3.672419  | 1.573379  | 0.663410  |
| H | 4.380298  | -1.011974 | -0.883417 |
| H | 3.767710  | 0.442649  | -1.676574 |
| H | 2.951112  | -1.108927 | -1.921713 |
| H | -2.007386 | -0.465425 | 1.855788  |
| H | -2.364672 | -2.293631 | 0.494211  |
| H | -3.797226 | 0.207661  | 0.494147  |
| H | -3.465810 | -0.958288 | -0.785600 |
| H | -1.759886 | 0.367533  | -1.790624 |
| H | -0.332773 | 3.505149  | -0.948293 |
| H | -0.305648 | 2.121225  | -2.038325 |
| H | 1.789413  | 2.356278  | -0.736837 |
| H | 0.925497  | 2.220350  | 0.774869  |
| H | -1.265769 | 2.449370  | 1.707257  |
| H | -2.951830 | 2.066469  | 1.344791  |
| H | -2.235548 | 3.576270  | 0.773865  |
| O | -1.947148 | -2.919974 | -0.525168 |
| O | -0.663353 | -2.330714 | -0.373609 |

Rotational constants (GHz):    0.6845300    0.4652400    0.3256400

Vibrational harmonic frequencies (cm-1):

|            |          |          |
|------------|----------|----------|
| -1573.5287 | 50.4487  | 57.8202  |
| 74.8330    | 131.1962 | 157.2613 |
| 167.0136   | 191.4932 | 211.2752 |
| 220.3824   | 225.3154 | 262.7849 |
| 276.6082   | 299.6308 | 304.6095 |
| 321.3586   | 344.6247 | 360.8329 |
| 399.3757   | 419.2492 | 430.4582 |
| 465.8780   | 493.8782 | 549.3082 |
| 555.7572   | 580.1924 | 658.7849 |
| 685.5443   | 728.0472 | 759.4859 |
| 791.2522   | 827.0372 | 835.8938 |
| 859.2391   | 893.0828 | 903.4528 |
| 906.2936   | 922.9378 | 938.2659 |

|           |           |           |
|-----------|-----------|-----------|
| 944.1565  | 952.9616  | 958.8335  |
| 984.3276  | 992.8964  | 1002.8527 |
| 1021.8121 | 1031.3820 | 1048.8817 |
| 1060.1102 | 1071.8167 | 1098.3586 |
| 1127.8738 | 1151.5500 | 1167.3845 |
| 1184.1469 | 1208.0627 | 1223.6009 |
| 1237.7665 | 1241.6657 | 1250.2873 |
| 1257.8556 | 1282.0710 | 1298.1068 |
| 1311.6121 | 1316.8787 | 1330.9195 |
| 1342.7273 | 1360.2141 | 1379.9079 |
| 1395.4737 | 1403.7878 | 1415.8679 |

|           |           |           |
|-----------|-----------|-----------|
| 1416.4498 | 1421.7687 | 1476.8446 |
| 1479.4977 | 1485.3720 | 1486.8746 |
| 1487.5819 | 1492.0049 | 1495.9209 |
| 1500.1220 | 1508.2644 | 1509.7598 |
| 1511.4106 | 1719.0288 | 1858.0841 |
| 3005.0332 | 3008.0943 | 3011.6034 |
| 3016.7636 | 3022.0512 | 3033.2968 |
| 3044.3339 | 3048.6235 | 3057.7794 |
| 3062.7201 | 3067.1059 | 3070.1632 |
| 3074.4718 | 3082.3024 | 3084.4220 |
| 3087.7787 | 3101.5458 | 3110.4447 |
| 3112.9293 | 3117.4861 | 3123.6809 |

Zero-point correction (Hartree): 0.329215

### TS31

-----  
 E(RB+HF-LYP/6-311G(d,p)) (Hartree): -697.147523382

Electronic state : 1-A

Cartesian coordinates (Angs):

|   |           |           |           |
|---|-----------|-----------|-----------|
| C | -0.362654 | 0.392313  | 0.722744  |
| C | -0.967221 | -0.513220 | -0.417553 |
| C | -1.809396 | 0.685133  | 1.238142  |
| C | -2.414091 | -0.283215 | 0.173911  |
| C | -3.095415 | -1.505098 | 0.794527  |
| C | -3.348809 | 0.407516  | -0.820812 |
| C | 0.591811  | 1.460502  | 0.265768  |
| C | 1.922977  | 1.616651  | 0.956889  |
| C | 3.040872  | 0.939897  | 0.075276  |
| C | 2.416099  | -0.154942 | -0.760159 |
| C | 2.028521  | -1.368575 | -0.350694 |
| C | 0.979844  | -2.111224 | -1.149189 |
| C | -0.438866 | -1.949377 | -0.534935 |
| C | 2.462944  | -2.005647 | 0.944427  |
| H | 0.182309  | -0.203845 | 1.456514  |
| H | -0.876109 | -0.004634 | -1.379686 |
| H | -2.083586 | 1.726885  | 1.103691  |
| H | -1.970902 | 0.379972  | 2.275475  |
| H | -4.008181 | -1.192973 | 1.312125  |
| H | -2.461216 | -2.010033 | 1.528520  |
| H | -3.383267 | -2.238994 | 0.035325  |
| H | -4.284082 | 0.704427  | -0.333423 |
| H | -3.603274 | -0.264066 | -1.648902 |
| H | -2.871950 | 1.302324  | -1.226335 |
| H | 1.887168  | 1.145613  | 1.939905  |
| H | 2.130803  | 2.681830  | 1.086324  |
| H | 3.828898  | 0.579691  | 0.739606  |
| H | 3.485340  | 1.693032  | -0.576449 |
| H | 2.054640  | 0.179356  | -1.728765 |
| H | 1.208557  | -3.182445 | -1.201040 |

|                                          |           |           |           |
|------------------------------------------|-----------|-----------|-----------|
| H                                        | 0.966716  | -1.733751 | -2.176001 |
| H                                        | -1.136173 | -2.516632 | -1.162382 |
| H                                        | -0.461784 | -2.435487 | 0.446136  |
| H                                        | 1.613005  | -2.212401 | 1.603821  |
| H                                        | 3.177511  | -1.394746 | 1.497631  |
| H                                        | 2.937009  | -2.972853 | 0.742019  |
| O                                        | -0.802578 | 2.705124  | -0.532457 |
| O                                        | 0.506188  | 2.083058  | -0.863062 |
| Rotational constants (GHz):              | 0.7389800 | 0.4814300 | 0.3527200 |
| Vibrational harmonic frequencies (cm-1): |           |           |           |
| -423.5339                                | 43.2647   |           | 78.6885   |
| 91.8862                                  | 114.5473  |           | 155.3110  |
| 163.1602                                 | 204.2854  |           | 209.9701  |
| 218.0347                                 | 263.4715  |           | 271.8929  |
| 283.9923                                 | 290.7898  |           | 295.9619  |
| 321.9766                                 | 344.9423  |           | 380.7559  |
| 397.2196                                 | 400.4427  |           | 436.1718  |
| 459.0645                                 | 480.5469  |           | 524.3430  |
| 558.8826                                 | 560.4271  |           | 602.1944  |
| 678.7677                                 | 738.1553  |           | 743.3854  |
| 805.7093                                 | 809.9915  |           | 826.9198  |
| 843.4504                                 | 869.9918  |           | 878.4809  |
| 901.1277                                 | 912.0293  |           | 931.1501  |
| 954.2372                                 | 960.3730  |           | 980.6089  |
| 992.1758                                 | 999.2636  |           | 1015.6986 |
| 1031.5449                                | 1035.4098 |           | 1060.7958 |
| 1066.8027                                | 1086.6129 |           | 1126.4857 |
| 1131.9379                                | 1167.1536 |           | 1182.4562 |
| 1192.9717                                | 1203.5822 |           | 1210.3828 |
| 1229.7941                                | 1241.9435 |           | 1251.5825 |
| 1259.5680                                | 1284.4601 |           | 1305.9266 |
| 1309.4735                                | 1330.9151 |           | 1341.7249 |
| 1358.6613                                | 1374.8700 |           | 1389.2827 |
| 1398.4838                                | 1401.1219 |           | 1419.1062 |
| 1420.5736                                | 1464.8794 |           | 1476.5163 |
| 1479.0994                                | 1486.1007 |           | 1487.0726 |
| 1492.4863                                | 1494.9556 |           | 1498.1408 |
| 1500.6802                                | 1507.0442 |           | 1508.7275 |
| 1521.1025                                | 1721.4576 |           | 3005.5415 |
| 3010.1863                                | 3014.9419 |           | 3017.9781 |
| 3023.9748                                | 3045.1507 |           | 3045.9783 |
| 3054.7712                                | 3056.2186 |           | 3062.4399 |
| 3063.9582                                | 3065.6519 |           | 3070.6385 |
| 3076.6097                                | 3077.9072 |           | 3086.4674 |
| 3097.6482                                | 3101.4253 |           | 3109.7565 |
| 3117.7498                                | 3141.6061 |           | 3160.3126 |
| Zero-point correction (Hartree):         | 0.332504  |           |           |

### Rad-3

-----  
E(UB+HF-LYP/6-311G(d,p)) (Hartree): -621.422411136

Electronic state : 2-A

Cartesian coordinates (Angs):

|   |           |           |           |
|---|-----------|-----------|-----------|
| C | -0.611533 | 0.849509  | 0.721779  |
| C | -0.949080 | -0.340330 | -0.270936 |
| C | -2.073322 | 1.323040  | 0.556559  |
| C | -2.472848 | -0.084908 | 0.024040  |
| C | -3.038707 | -0.967822 | 1.142715  |
| C | -3.390222 | -0.116721 | -1.196187 |
| C | 0.512036  | 1.750139  | 0.234912  |
| C | 1.840022  | 1.479118  | 0.790649  |

|   |           |           |           |
|---|-----------|-----------|-----------|
| C | 2.970834  | 1.192558  | -0.158475 |
| C | 2.362317  | -0.006215 | -0.879007 |
| C | 2.097746  | -1.205251 | -0.333448 |
| C | 0.963502  | -2.033703 | -0.889590 |
| C | -0.370390 | -1.757309 | -0.133767 |
| C | 2.742775  | -1.722143 | 0.926058  |
| H | -0.404619 | 0.468721  | 1.725178  |
| H | -0.752161 | 0.030531  | -1.282691 |
| H | -2.129256 | 2.087991  | -0.220394 |
| H | -2.583100 | 1.677561  | 1.455504  |
| H | -4.029918 | -0.607886 | 1.436165  |
| H | -2.408756 | -0.958835 | 2.036604  |
| H | -3.147885 | -2.007822 | 0.820616  |
| H | -4.399153 | 0.222055  | -0.937270 |
| H | -3.478017 | -1.131353 | -1.600863 |
| H | -3.012356 | 0.532552  | -1.990720 |
| H | 1.888724  | 1.026443  | 1.776912  |
| H | 3.903423  | 0.979558  | 0.365439  |
| H | 3.137702  | 2.012768  | -0.858400 |
| H | 1.831009  | 0.257913  | -1.789327 |
| H | 1.184537  | -3.104873 | -0.816391 |
| H | 0.817178  | -1.806462 | -1.950148 |
| H | -1.113844 | -2.460418 | -0.529746 |
| H | -0.252075 | -2.017566 | 0.923584  |
| H | 2.007394  | -1.878981 | 1.723258  |
| H | 3.518847  | -1.057746 | 1.307566  |
| H | 3.203342  | -2.697886 | 0.733673  |
| O | 0.340026  | 2.534244  | -0.692545 |

Rotational constants (GHz): 0.9185800 0.4856600 0.3796300

Vibrational harmonic frequencies (cm<sup>-1</sup>):

|           |           |           |
|-----------|-----------|-----------|
| 58.9055   | 70.2649   | 104.9023  |
| 136.1977  | 165.7162  | 179.4495  |
| 205.1040  | 213.6812  | 226.8911  |
| 240.4529  | 266.3425  | 286.0611  |
| 297.1063  | 307.9402  | 313.8316  |
| 352.3022  | 385.0774  | 402.2443  |
| 434.0700  | 435.5242  | 489.6581  |
| 525.5299  | 558.0062  | 585.0807  |
| 623.7552  | 669.2614  | 733.1277  |
| 750.1556  | 762.9650  | 820.2499  |
| 840.8779  | 883.4954  | 894.4115  |
| 913.9354  | 929.5274  | 934.3741  |
| 948.0215  | 952.5842  | 985.7749  |
| 987.4962  | 999.8776  | 1012.7923 |
| 1029.0759 | 1052.2691 | 1061.2370 |
| 1063.9049 | 1097.2056 | 1111.7298 |
| 1132.4616 | 1164.7903 | 1178.7509 |
| 1189.6889 | 1208.1360 | 1226.3207 |
| 1237.9399 | 1243.5759 | 1255.2859 |
| 1260.3689 | 1282.2677 | 1308.8559 |
| 1330.4600 | 1356.2213 | 1361.6270 |
| 1379.5668 | 1395.4669 | 1398.9254 |
| 1404.8113 | 1417.2678 | 1419.5528 |
| 1474.7596 | 1478.5153 | 1485.0094 |
| 1487.2860 | 1490.2207 | 1493.1144 |
| 1497.0994 | 1500.9451 | 1507.9417 |
| 1510.1492 | 1666.1256 | 1681.6412 |
| 3006.3145 | 3009.1220 | 3012.6784 |
| 3018.8966 | 3021.5149 | 3027.4013 |
| 3045.0238 | 3048.1863 | 3053.3433 |
| 3059.3230 | 3064.4836 | 3065.5262 |

|           |           |           |
|-----------|-----------|-----------|
| 3067.3979 | 3078.4081 | 3084.1058 |
| 3086.6671 | 3106.6200 | 3108.8956 |
| 3113.9814 | 3146.8504 | 3155.4213 |

Zero-point correction (Hartree): 0.316902

**Ester CH<sub>3</sub>C(O)OCH<sub>3</sub>**

-----  
E(RB+HF-LYP/CBSB7) (Hartree): -268.467105133

Electronic state : 1-A

Cartesian coordinates (Angs):

|   |           |           |           |
|---|-----------|-----------|-----------|
| C | -0.462493 | 0.179445  | -0.000014 |
| O | 0.548713  | -0.719222 | -0.000020 |
| O | -0.290182 | 1.371439  | -0.000001 |
| C | -1.799096 | -0.519426 | 0.000005  |
| H | -2.595021 | 0.222029  | -0.000264 |
| H | -1.884073 | -1.160696 | -0.880065 |
| H | -1.884265 | -1.160215 | 0.880414  |
| C | 1.874934  | -0.161634 | 0.000013  |
| H | 2.549722  | -1.014801 | 0.000016  |
| H | 2.032678  | 0.452828  | -0.887826 |
| H | 2.032640  | 0.452808  | 0.887872  |

Rotational constants (GHz): 10.2157000 4.1474400 3.0624800

Vibrational harmonic frequencies (cm-1):

|           |           |           |
|-----------|-----------|-----------|
| 50.8520   | 121.2861  | 180.4749  |
| 282.3992  | 423.1571  | 606.7493  |
| 645.2878  | 858.5963  | 982.8974  |
| 1065.7800 | 1070.1374 | 1173.6199 |
| 1208.9474 | 1264.4403 | 1396.7738 |
| 1471.3790 | 1474.8110 | 1477.1089 |
| 1483.4773 | 1500.8411 | 1816.6629 |
| 3047.5606 | 3050.9079 | 3110.9711 |
| 3117.7114 | 3154.4319 | 3157.7604 |

Zero-point correction (Hartree): 0.089293

**TS of CO<sub>2</sub>-elimination**

-----  
E(RHF/6-31+(d')) (Hartree): -266.637262537

E(CCS(D(T)/6-31+(d')) (Hartree): -267.50706344

E(MP2/6-31+(d')) (Hartree): -267.44663873

E(MP3/6-31+(d')) (Hartree): -267.44694226

Electronic state : 1-A

Cartesian coordinates (Angs):

|   |           |           |           |
|---|-----------|-----------|-----------|
| C | 0.085994  | -0.430323 | 0.000016  |
| O | -0.046492 | -0.888325 | 1.150501  |
| O | -0.046299 | -0.888421 | -1.150449 |
| C | 1.242043  | 0.840549  | 0.000058  |
| H | 1.169060  | 1.424687  | -0.910432 |
| H | 1.169790  | 1.423534  | 0.911346  |
| H | 2.141506  | 0.229347  | -0.000733 |
| C | -1.241194 | 0.919838  | -0.000110 |
| H | -1.088728 | 1.459578  | 0.923214  |
| H | -1.089370 | 1.458405  | -0.924224 |
| H | -2.080987 | 0.238031  | 0.000637  |

Rotational constants (GHz): 5.2093893 5.0630342 4.7965546

Vibrational harmonic frequencies (cm-1):

|           |           |           |
|-----------|-----------|-----------|
| -348.6615 | 124.6903  | 186.0628  |
| 272.0867  | 290.7115  | 356.9734  |
| 362.0994  | 462.1389  | 641.9806  |
| 784.6271  | 801.6118  | 927.7804  |
| 981.7468  | 1156.9650 | 1225.1395 |
| 1314.7584 | 1426.3859 | 1447.6377 |



|                                           |           |           |
|-------------------------------------------|-----------|-----------|
| 1460.1689                                 | 1471.7139 | 1629.6463 |
| 3080.4111                                 | 3116.3792 | 3187.0429 |
| 3217.8083                                 | 3269.5699 | 3285.6003 |
| Zero-point correction (Hartree): 0.083112 |           |           |
